# 1 Orphanhood and caregiver death among children in the United 2 States due to all-cause mortality 2000-2021: A Modeling Study

3  
4  
5 Andrés Villaveces, MD, PhD<sup>\*†1</sup>, Yu Chen, MS<sup>\*2</sup>, Sydney Tucker, MS<sup>2</sup>, Alexandra Blenkinsop, PhD<sup>2</sup>, Prof  
6 Lucie Cluver, PhD<sup>3</sup>, Prof Lorraine Sherr, PhD<sup>4</sup>, Jan L. Losby, PhD<sup>1</sup>, Linden Graves, Mr<sup>2</sup>, Rita Noonan,  
7 PhD<sup>1</sup>, Francis Annor, PhD<sup>1</sup>, Victor Kojey-Merle, Mr<sup>2</sup>, Douhan Wang, Mr<sup>2</sup>, Greta Massetti, PhD<sup>1</sup>, Laura  
8 Rawlins, PhD<sup>5</sup>, Charles A. Nelson, PhD<sup>6</sup>, H Juliette T Unwin, PhD<sup>7</sup>, Seth Flaxman, PhD<sup>8</sup>, Susan Hillis,  
9 PhD<sup>§9</sup>, Oliver Ratmann PhD<sup>§2</sup>

10  
11 1 National Center for Injury Prevention and Control, Centers for Disease Control and Prevention,  
12 Atlanta, Georgia, USA

13 2 Department of Mathematics, Imperial College London, London, UK

14 3 Centre for Evidence-Based Social Intervention, Department of Social Policy and Intervention,  
15 University of Oxford, Oxford, UK

16 4 Institute of Global Health, University College London, London, UK

17 5 Gender Group, World Bank, Washington DC, USA

18 6 Harvard Medical School and Boston Children's Hospital, Harvard University, Boston, MA, USA

19 7 School of Mathematics, University of Bristol, Bristol, UK

20 8 Department of Computer Science, University of Oxford, Oxford, UK

21 9 Global Reference Group on Children Affected by COVID-19 and in Crisis, University of Oxford,  
22 Oxford, UK

23  
24 \* Joint first authors

25 § Joint senior authors

26  
27  
28  
29  
30  
31 † **Corresponding author:** Andrés Villaveces, Division of Violence Prevention, National Center for Injury

32 Prevention and Control, Centers for Disease Control and Prevention, 4770 Buford Hwy, NE, MS-F64,

33 Atlanta GA, 30341, USA. Email: [nnp4@cdc.gov](mailto:nnp4@cdc.gov)

34  
35  
36  
37  
38  
39  
40  
41  
42  
43 **Disclaimer:** The findings in this report are those of the authors. They do not necessarily represent  
44 the official position of the US Centers for Disease Control and Prevention. For the purpose of open  
45 access, the authors have applied a 'Creative Commons Attribution' (CC-BY) license to any Author  
46 Accepted Manuscript version arising.

47 **NOTE:** This preprint reports new research that has not been certified by peer review and should not be used to guide clinical practice.

48 **Key Point** (99 of 100 words)

49

50 **Question:** What are U.S. trends in all-cause and cause-specific orphanhood and caregiver death  
51 among children <18?

52

53 **Findings:** From 2000-2021, orphanhood and caregiver loss incidence and prevalence increased  
54 49.2% and 8.3%, respectively. By 2021, 2.9 million children (4% of all children) were affected.  
55 Populations disproportionately affected by orphanhood included 1.7 million adolescents ages 10-17;  
56 6.5%, 4.8%, and 3.9% respectively of non-Hispanic American Indian/Alaska Native, non-Hispanic  
57 Black, and non-Hispanic White children; and children in New Mexico, Southern and Eastern States.  
58 Drug overdose was the leading cause of orphanhood during the COVID-19 pandemic.

59

60 **Meaning:** Evidence-based programs and policies are needed to prevent orphanhood and support  
61 these bereaved children.

62

63

64

65 **Abstract: (349 of 350 words)**

66

67 **Importance:** Deaths of parents and grandparent caregivers linked to social and health crises  
68 threaten child wellbeing due to losses of nurturance, financial support, physical safety, family  
69 stability, and care. Little is known about the full burden of all-causes and leading cause-specific  
70 orphanhood and caregiver death beyond estimates from select causes.

71

72 **Objective:** To estimate 2000-2021 prevalence and incidence trends of all-cause orphanhood and  
73 caregiver death among children <18, by cause, age, race/ethnicity, and state.

74

75 **Data Sources:** National Center for Health Statistics (NCHS) birth, death, race/ethnicity, and  
76 population data to estimate fertility rates and identify causes of death; 1983-1998 ICD-9 causes-of-  
77 death harmonized to ICD-10 classifications; 1999-2021 ICD-10 causes-of-death; CDC WONDER for  
78 state-specific estimates; and American Community Survey for grandparent population estimates.

79

80 **Data extraction and synthesis:** We extracted U.S. population-level death, birth, population size,  
81 race, and ethnicity data from NCHS and attributed to each deceased individual the average number  
82 of children left behind according to subgroup-specific fertility rates in the previous 0-17 years. We  
83 examined prevalence and incidence of orphanhood by leading causes-of-death, including COVID-19,  
84 the leading 5 causes-of-death for 1983-2021, and additional leading causes for ages 15-44. We  
85 extended these to obtain state-level outcome estimates.

86

87 **Main outcome measures:** National incidence and prevalence of orphanhood and caregiver death  
88 from 2000-2021, with orphanhood by year, parental cause-of-death and sex, child age,  
89 race/ethnicity, and state.

90

91 **Results:** From 2000-2021, orphanhood and custodial/co-residing grandparent caregiver loss annual  
92 incidence and prevalence trends increased 49.2% and 8.3%, respectively. By 2021, 2.9 million  
93 children (4% of all children) had experienced prevalent orphanhood and caregiver death.  
94 Populations disproportionately affected by orphanhood included 5.0% of all adolescents; 6.5%, 4.8%,  
95 and 3.9% respectively of non-Hispanic American Indian/Alaska Native, non-Hispanic Black, and non-  
96 Hispanic White children; and children in New Mexico and Southern and Eastern States. Parental  
97 death due to drug overdose during 2020-2021 surpassed COVID-19 as the leading cause of incident  
98 and prevalent orphanhood during the COVID-19 pandemic.

99

100 **Conclusions and Relevance:** Policies, programs, and practices aimed at orphanhood prevention,  
101 identification, and linkage to services and support of nearly 3 million bereaved children are needed,  
102 foremost prioritizing rapidly increasing overdose-linked orphanhood.

103

104

105 “The death of a parent is one of the last taboos in public health. The acute and chronic pain of  
106 parental loss and the resulting tragedy for the children ... left behind are almost too distressing to  
107 contemplate.”

108 *The Editorial, The Lancet Public Health, August 2022.*

109  
110 (3,030 of 3,000 words)

## 111 **Introduction**

112 Deaths of parents and co-residing/custodial grandparent caregivers, in the context of  
113 intersecting social and health crises, threaten child wellbeing<sup>1</sup> due to losses of nurturance, financial  
114 support, housing, and care.<sup>2-4</sup> Orphanhood (death of one or both parents)<sup>5,6</sup> and caregiver loss  
115 (death of co-resident/custodial grandparents) are considered Adverse Childhood Experiences  
116 (ACEs),<sup>7,8</sup> and may have enduring consequences that persist well into adulthood.<sup>9-12</sup> ACE’s are  
117 associated with increased chronic stress and lifelong risks of mental health illness, suicide, post-  
118 traumatic stress disorder, violence, insecure housing,<sup>13</sup> and chronic and infectious diseases.<sup>14,15</sup>  
119 These impacts often lead to ongoing needs for mental health, parenting, educational, and economic  
120 support for affected children, and for foster care or adoption services for children bereft of care.<sup>15</sup>

121 In the United States, mortality data informs public health prevention and response policies  
122 according to leading causes-of-death.<sup>16</sup> However, one disproportionately affected population often  
123 remains largely invisible – those children left behind by adult deaths.<sup>2,6,17</sup> One exception are children  
124 experiencing COVID-19-associated orphanhood, where real-time incidence estimates<sup>18-20</sup> led to  
125 policies to support children, including recommendations in the National COVID-19 Pandemic  
126 Preparedness Plan<sup>21</sup> and investments in some states,<sup>22</sup> such as financial, bereavement, and mental  
127 health support for bereaved children and surviving caregivers. These established frameworks raise  
128 the possibility that new standards of care can be extended for any child experiencing orphanhood,  
129 regardless of cause.<sup>23</sup>

130 To inform evidence-based, compassionate prevention and response strategies for affected  
131 children and families, understanding the numbers, time-trends, causes, locations and disparities in  
132 all-cause orphanhood is essential. Reports show COVID-19 excess deaths caused a surge in  
133 orphanhood and caregiver death, affecting over 10.5 million children globally.<sup>24</sup> In the U.S., the  
134 pandemic was linked to increased challenges including substance use, economic crises, mental  
135 health distress, and may have been linked to deaths due to overdose, suicide, and excessive alcohol  
136 use.<sup>25,26</sup> Though reports have described the U.S. orphanhood burden related to HIV,<sup>27</sup> maternal  
137 cancers,<sup>23</sup> COVID-19,<sup>15</sup> and child bereavement,<sup>28</sup> up-to-date estimates on all-cause orphanhood do  
138 not exist.

139

140 Therefore, we estimate prevalence, incidence, and trends from 2000-2021 in all-cause  
141 orphanhood and caregiver death among children in the U.S. We further characterize leading causes  
142 of orphanhood and caregiver loss and identify whether the compound crises of the COVID-19  
143 pandemic and drug overdose epidemic in 2020 and 2021 were associated with escalating  
144 orphanhood. We aim to identify populations disproportionately affected, by age, race/ethnicity, and  
145 state, to strengthen evidence-based response strategies. Our findings can contribute to identifying  
146 children at risk among population subgroups and geographic areas, and to targeting effective  
147 prevention and protection programming for affected children and parents/caregivers.

148

## 149 **Methods**

150

### 151 **Overview**

152 We adapted methods from Hillis et al<sup>19</sup> to estimate the magnitude of orphanhood and  
153 caregiver loss among children ages 0-17 from all causes of deaths, according to Guidelines for  
154 Accurate and Transparent Health Estimates Reporting (GATHER). We extracted subgroup-specific  
155 individual live birth and death data from National Center for Health Statistics (NCHS), along with  
156 population size estimates. We then attributed to each deceased individual the average number of  
157 children orphaned using subgroup-specific fertility rates in the previous 0-17 years. Our outcomes  
158 were orphanhood incidence and prevalence from 2000 through 2021, disaggregated by year, child  
159 age, and sex, race/ethnicity, cause-of-death of the deceased parent (numbers and percent of child  
160 population). We extended these estimates to include loss of co-residing/custodial grandparent  
161 caregivers, and state-level estimates of incidence and prevalence of orphanhood and grandparent  
162 caregiver loss (Supplementary Text (ST) S1, Fig. S2). We calculated 95% uncertainty intervals around  
163 estimates using bootstrap resampling (ST S1).

164

### 165 **National mortality data**

166 We extracted mortality data of U.S. residents by underlying cause-of-death from NCHS Vital  
167 Statistics for 1983-2021.<sup>29</sup> The World Health Organization (WHO) defines underlying cause-of-death  
168 as "the disease or injury which initiated the train of events leading directly to death, or the  
169 circumstances of the accident or violence which produced the fatal injury".<sup>30</sup> Mortality records<sup>29</sup>  
170 were mapped and aggregated to one of 53 caregiver loss causes-of-death that are closely related to  
171 the 52 rankable causes-of-death in the NCHS 113 cause-of-death list<sup>31</sup>, or 'Other' caregiver loss  
172 cause-of-death (ST S1). Cause-of-death classifications changed with the Tenth Revision of the

173 International Classification of Disease (ICD-10), and we harmonized 1983-1998 cause-of-death data  
174 to ICD-10 classifications to avoid discontinuities in orphanhood estimates from 1998-1999 (ST S1).

175 Our cause-specific analyses for orphanhood estimates focused on leading causes of death in  
176 2021: COVID-19, drug overdose, the remaining top five causes-of-death overall (heart disease,  
177 cancer, unintentional injuries, cerebrovascular diseases, chronic lung disease), and any additional  
178 causes of death in the top five for men and women ages 15-44 (suicide and homicide), as these ages  
179 include those more likely to be parents. We used a hierarchical approach for classifying cause of  
180 death; therefore, we consistently excluded drug overdose from each of these three categories:  
181 suicide, homicide, and unintentional injuries. Race and ethnicity in death certificates are typically  
182 reported by next of kin. We converted data that were incrementally reported by multiple races to  
183 standardised race categories (Table S7).

184

### 185 **National orphanhood estimates**

186 To estimate the number of children each death leaves behind, we obtained age, race, and  
187 ethnicity data of fathers and mothers from NCHS live birth records.<sup>29,31</sup> We used corresponding  
188 1990-2021 population sizes<sup>32</sup> to calculate annualized age- and sex-specific national-level fertility  
189 rates by standardised race/ethnicity categories (ST S1). Before 1990, we assumed fertility rates of  
190 1990 because population sizes by race/ethnicity were unavailable before 1990, and report  
191 corresponding sensitivity analyses (ST S2).

192

#### 193 *Incidence*

194 We estimated annual incidence of orphanhood for a given year among children by  
195 multiplying the number of cause-specific deaths among adults stratified by sex, race/ethnicity, and  
196 five-year age bands in each year 1983-2021, with the expected number of children aged 0-17 born to  
197 each adult, with the corresponding characteristics in the same year. Calculations were performed by  
198 race/ethnicity groups and then aggregated to U.S. totals due to correlations between mortality and  
199 fertility rates by race/ethnicity (ST S1). Age of child was attributed by considering fertility rates in  
200 each of the current and preceding 17 years, after adjustment for pediatric survival probabilities  
201 (Table S4).

202

#### 203 *Prevalence*

204 We estimated annual prevalence of orphanhood among children in any given year in 2000-  
205 2021 by cumulatively summing incidence estimates by one-year age of child in the current and  
206 previous 17 years, excluding children who would have since turned 18; calculations of orphanhood

207 prevalence for 2000-2015 required including annual orphanhood incidence estimates for 1983-1999,  
208 in order to include the cumulative prior 17-year risk for experiencing prevalent parental death. We  
209 removed duplicate orphanhood counts by adjusting for those who had lost both parents (ST 1, Table  
210 S5). Incidence and prevalence rates were calculated relative to child population sizes in the  
211 corresponding year.

212

### 213 **National grandparent caregiver loss**

214 We estimated annual incidence of children losing grandparent caregivers in 1983-2021 by  
215 multiplying the number of cause-specific deaths in each year in adults aged 30 years and above  
216 stratified by sex and race/ethnicity with the corresponding proportions of adults co-residing with  
217 their grandchild(ren) and providing some or all basic needs for grandchild(ren), using U.S. Census  
218 American Community Surveys (ACS) 2010-2021 data (ST S1).<sup>33</sup> We assumed only one child was  
219 affected by each grandparent caregiver death. We also developed estimates for the age of children  
220 affected (Fig S21).

221

### 222 **State-level orphanhood and grandparent caregiver death estimates**

223 We generated state-level estimates of cause-specific incidence and prevalence of  
224 orphanhood and caregiver death for 2021, using data from CDC WONDER.<sup>34,35</sup> (ST S1). State-level  
225 orphanhood and caregiver death were calculated as above, with exceptions for male fertility rates  
226 for 2005-2015 (ST S1). We developed correction factors to adjust for bias resulting from data not  
227 stratified by race and ethnicity (ST S1).

228

## 229 **Results**

230

### 231 **All-cause orphanhood and caregiver loss**

232 In 2021, we estimate 498,249 (95% CI, 496,938-499,639) children experienced incident  
233 orphanhood or caregiver death from any cause (0.72% of children, Table 1, Fig. S2). Most children  
234 lost a parent (81.6%), while the remainder lost a grandparent caregiver (18.4%). Before the COVID-  
235 19 pandemic, incidence of orphanhood, and of orphanhood/caregiver loss (combined) increased  
236 rapidly from 2000 to 2019 by 11.4% and 11.7%, respectively (Table 1). Through the pandemic,  
237 incidence of orphanhood, and of orphanhood/caregiver loss (combined) increased further from 2019  
238 to 2021 by 39.5% and 33.6%, respectively. Prevalence of orphanhood, and of orphanhood/caregiver  
239 loss decreased slightly by 2.4% and 0.9% from 2000 to 2019, then increased by 10.1% and 9.3%  
240 during the period spanning the pandemic years (2019 to 2021). In 2021, we estimate 2,966,008



241 (95%CI, 2,963,030-2,968,931) children experienced prevalent orphanhood or caregiver death,  
242 representing 4.0% of all children.

243

#### 244 **Cause-specific trends**

245 From 2000-2021, orphanhood caused by drug overdose increased markedly, as did  
246 orphanhood due to COVID-19 between 2019-2021. Orphanhood due to suicide decreased until 2010  
247 and subsequently increased. Orphanhood due to unintentional injuries and homicide decreased  
248 until 2019, then increased until 2021; orphanhood due to diseases of the heart remained relatively  
249 unchanged until 2019, then increased. Only orphanhood due to malignant neoplasms consistently  
250 decreased from 2000-2021. By 2021, both incidence and prevalence of orphanhood due to fatal  
251 injuries – including drug overdose, suicide, homicide, and unintentional injuries (e.g. motor vehicle  
252 crashes) – exceeded orphanhood due to chronic diseases (Fig 1A, B and Table S1). Orphanhood  
253 caused by drug overdose rose substantially from 2012-2019, then jumped sharply during 2020-2021  
254 (Fig 1C). From 2000-2019, orphanhood incidence due to drug overdose increased from an estimated  
255 0.015% of children in 2000, to 0.06% in 2019, 0.085% in 2020 after the pandemic onset, and 0.09%  
256 in 2021. Drug overdose was the leading cause of orphanhood incidence and prevalence in 2020 and  
257 2021, surpassing both chronic diseases and COVID-19 (Fig 1C, D). The disproportionate impact of  
258 fatal injuries on orphanhood was evident in 2021, with drug overdose contributing 17.5% to  
259 orphanhood incidence, yet only 3.1% to adult mortality (Fig 1E); similarly, unintentional injuries,  
260 suicide, and homicide contributed 8.3%, 5.0%, and 3.7% to orphanhood, versus 3.6%, 1.2% and 0.7%,  
261 respectively, to adult deaths.

262

#### 263 **Disparities by age and race/ethnicity**

264 From 2000-2021, children ages 10-17 years were 5.4 times more likely than children ages 0-4  
265 to experience prevalent orphanhood (Fig 2A, Table S2). By 2021, orphanhood prevalence among  
266 ages 10-17 was 5.0%, affecting 1,704,671 children. Substantial disparities across race and ethnicity  
267 occurred, accentuated by the COVID-19 pandemic. By 2021, orphanhood affected 6.5% of non-  
268 Hispanic American Indian or Alaska Native children, 4.8% of non-Hispanic Black children, 3.9% of  
269 non-Hispanic White children, 1.7% of Hispanic children, and 1.9% of non-Hispanic Asian children (Fig  
270 2C).

271 Causes underpinning these disparities differed by parental race/ethnicity and sex (Fig 2D,  
272 Table S3). Among non-Hispanic American Indian or Alaska Native children, leading causes of  
273 maternal orphanhood in 2021 were, in order, COVID-19, drug overdose, and chronic liver disease  
274 and cirrhosis; while leading causes of paternal orphanhood were chronic liver disease and cirrhosis,

275 unintentional injuries, and diseases of the heart – all of which increased as causes of orphanhood  
276 since 2000. Among non-Hispanic Black children, leading causes of maternal orphanhood were  
277 COVID-19, diseases of heart, and drug overdose; while paternal orphanhood was primarily caused by  
278 diseases of heart, drug overdose, and homicide. In non-Hispanic White children, drug overdose  
279 deaths among fathers increased substantially over the past two decades; in Hispanic children,  
280 COVID-19 deaths among fathers predominated. In non-Hispanic Asian children, primary causes of  
281 orphanhood were heart disease, malignant neoplasms, and COVID-19.

282

### 283 **State-level Estimates**

284 In 2021, 33 states had >3% of all children experiencing prevalent orphanhood; Southeastern,  
285 Northeastern, Southern Border, and Midwest states were most affected (Table 2, Fig. 3, and Tables  
286 S4-S6). California, Texas, and Florida had the highest numbers of children experiencing orphanhood  
287 incidence and prevalence in 2021. West Virginia and New Mexico had the highest incidence (0.8-  
288 0.9%) and prevalence rates (4.5-5.0%) of orphanhood in 2021. Injury-associated parental deaths –  
289 including overdose, suicide, and/or unintentional injury – were among the top two causes of  
290 orphanhood prevalence in 47 states (Table 2). Drug overdose was the leading cause of orphanhood  
291 prevalence in 30 states, particularly affecting Southeastern, Southwestern, Southern Border, and  
292 Midwest states, and Southwestern States with large American Indian and Alaska Native populations.

293

### 294 **Discussion**

295

296 Over the past two decades, prevalence of all-cause orphanhood and caregiver death  
297 decreased slightly until 2019 and then increased markedly during 2020-2021 with intersecting  
298 crises of the overdose epidemic and COVID-19 pandemic.<sup>36,37</sup> Parental death due to drug overdose  
299 was the leading cause of orphanhood incidence and prevalence during the pandemic. By 2021,  
300 over 2.9 million children – 4.0% of all children in the U.S. – had lost a parent or caregiver in their  
301 lifetime. Populations disproportionately affected by orphanhood included over 1.7 million  
302 adolescents ages 10-17 years (1 of every 20 adolescents); and children of non-Hispanic American  
303 Indian or Alaska Native, non-Hispanic Black, and non-Hispanic White race/ethnicities  
304 (approximately 1 of 15, 1 of 20, and 1 of 25 children, respectively). Orphanhood prevalence was  
305 highest in West Virginia, New Mexico, Mississippi, Louisiana, and Kentucky, affecting 1 of every 25  
306 children. Compared to previous cause-specific reports (an estimated 97,376 children orphaned by  
307 HIV/AIDS (1998),<sup>27</sup> 157,183 by maternal cancers (2020),<sup>23</sup> and 218,800 by COVID-19 in 2020-  
308 2022<sup>38</sup>), data on all-cause orphanhood and co-residing grandparent caregiver death are over ten  
309 times greater, quantifying the full burden.

310

311 By 2021, orphanhood incidence and prevalence due to fatal injuries (drug overdose, suicide,  
312 homicide, and unintentional injuries), exceeded those linked to chronic diseases. Together, injuries  
313 and chronic diseases accounted for over half of all children orphaned. Fatalities due to injuries and  
314 chronic diseases among minoritized populations, are more common among younger adults still  
315 caring for children. For 47 states, drug overdose, suicide, and/or unintentional injuries were  
316 among the top two causes of orphanhood. Although drug overdose deaths were increasing before  
317 2020, pandemic-linked increases of these deaths exceeded those forecasted; and the pandemic  
318 appeared to increase drug overdose risk.<sup>39,40</sup> The evolving nature of drug supply, including the  
319 proliferation of illegally made fentanyl and resurgence of stimulants such as methamphetamine,  
320 has affected almost every state.<sup>41,42</sup> By 2021, our data show drug overdose contributed 17.5% to  
321 orphanhood compared to 3.1% to mortality; establishing comprehensive care programs for  
322 children orphaned due to drug overdose could better mitigate the long-term negative effects that  
323 these children are disproportionately facing.

324 Our findings reveal social and health disparities in orphanhood rates and leading caregiver  
325 causes-of-death between age, sex, and racial/ethnic groups, and across geographies. These results  
326 can inform and contextualize prevention and response programming for children affected by  
327 orphanhood. For non-Hispanic American Indian or Alaska Native persons, for example, alcohol-  
328 related deaths were a leading cause, while non-Hispanic Black populations showed homicide among  
329 fathers as a leading cause. Many of these disparities are related to historical racism and derived  
330 practices that foster inequitable access to housing, education, and employment. Populations most  
331 affected in different states may have been exposed to such inequalities.<sup>43</sup> In parts of the  
332 northeastern and midwestern U.S., rising unemployment, limited access to health and social services  
333 during the pandemic, increased access to a more lethal supply of illicit drugs or availability of other  
334 substances such as alcohol particularly among affected white men, may be linked to drug overdose  
335 emerging as the top cause of incident orphanhood in these regions.<sup>44</sup> Circumstances of parental  
336 death influence grief-related psychopathology in surviving children,<sup>45</sup> and evidence-based responses  
337 can improve short- and long-term outcomes.<sup>9,11,12</sup> It is paramount to keep children in their families,  
338 whenever possible. This requires ensuring bereaved families receive support, and those needing  
339 kinship or foster care are served rapidly.<sup>46</sup> Child resilience after parental loss can be strengthened by  
340 programs and policies that promote safe, stable, and nurturing relationships and environments, and  
341 that address childhood adversity, including preventing violence and abuse.<sup>46</sup>

342

343           Despite serious risks for bereaved children,<sup>47</sup> timely, multifaceted responses using an age-  
344 and life-stage approach may restore hope and build resilience.<sup>48</sup> As grief is an immediate reaction  
345 that can extend years after parental loss, healing and support are urgent needs for children, who  
346 may be less equipped to recover than adults, particularly when the loss is sudden and  
347 unexpected.<sup>11,27</sup> The governor of Utah<sup>49</sup> and others<sup>50</sup> have called for the addition to the death  
348 certificate of a checkbox to identify children living in the home of the deceased, so that bereaved  
349 children can be linked to support and services. Such responses typically provide parenting,  
350 economic, and education support, and are consistent with the WHO INSPIRE package for ending  
351 violence against children.<sup>51,52</sup>

352  
353           Our study has several limitations. First, cause-specific estimates of children experiencing  
354 orphanhood and caregiver deaths are derived from mortality statistics on underlying causes-of-  
355 death, and may be underestimates<sup>53</sup> for causes associated with erroneous or incomplete reporting,  
356 uncertainty in the chain of events preceding death, or coding limitations - such as for COVID-19, drug  
357 overdose, or suicide.<sup>54</sup> Second, as we attributed only one child per grandparent caregiver death, our  
358 estimates of grandparent caregiver loss are minimum estimates. Third, we assumed current  
359 mortality is unrelated to historic fertility for years before 1990, and sensitivity analyses suggest this  
360 may lead to inaccuracies in orphanhood prevalence estimates until 2007 (ST S2). Fourth, publicly  
361 available state-specific data were partly suppressed due to small counts; therefore, we cannot  
362 exclude bias in state-specific orphanhood estimates. Finally, to characterise orphanhood prevalence  
363 in 2000-2021, we had to consider vital statistics since 1983 and consolidate changes in cause-of-  
364 death and race/ethnicity coding. Our sensitivity analyses, including detailed comparisons of NCHS  
365 death data to CDC WONDER vital statistics for each of the 21 years' calculations (ST S2), suggest our  
366 incidence and prevalence estimates are robust, and should be interpreted as minimum estimates of  
367 orphanhood and caregiver death.

368           In conclusion, evidence-based policies and programs that provide healing and support for  
369 nearly 3 million children and adolescents in the U.S. who have experienced orphanhood and  
370 caregiver loss are urgently needed to reduce longterm negative affectsof this adverse childhood  
371 experience. This is especially relevant given unprecedented rates of drug overdoses, increasing the  
372 possibility that children who are living in a household where a parent or caregiver is negatively  
373 affected by substance use, may also experience the loss of a parent.<sup>52,55</sup> Evidence highlights three  
374 essential components of orphanhood prevention and response that effectively promote their  
375 recovery and resilience: (1) prevent death of parents and caregivers through timely prevention and  
376 treatment of leading causes of death and ensured access to affordable compassionate health and

377 mental health care for all; (2) prepare families to provide safe and nurturing alternative care; and (3)  
378 protect children affected by orphanhood and vulnerabilities, through grief and mental health  
379 counseling, and parenting, economic, and educational support that can be contextualized and  
380 delivered at scale.<sup>19,56</sup>

381

382 **Ethical approval:**

383 All data used for this study are publicly available through U.S. Government websites.

384

385 **Data sharing statement:**

386 All data used to calculate estimates of mortality and orphanhood are publicly available.

387

388 **Code availability:**

389 Code to reproduce all analyses is freely available on Github version 1.1.2 under the GNU General  
390 Public License version 3.0 at the repository ([https://github.com/MLGlobalHealth/orphanhood-  
391 caregiver-death-in-US-from-all-causes-of-mortality](https://github.com/MLGlobalHealth/orphanhood-caregiver-death-in-US-from-all-causes-of-mortality)).

392

393 **Acknowledgements:**

394 We thank the Global Reference Group for Children In Crisis, reviewers at the CDC and NCHS  
395 especially Dr. Robert Anderson for his helpful suggestions on interpreting and classifying disease  
396 groups and race groups using existing NCHS data. We also thank Prof. Chris Desmond for his  
397 comments on early versions of this work. We thank the Imperial College Research Computing Service  
398 (<https://doi.org/10.14469/hpc/2232>) for providing the computational resources to perform this  
399 study; and Zulip for sponsoring team communications through the Zulip Cloud Standard chat app.  
400 This study was supported by the Oak Foundation (to LC, LS); the Moderna Charitable Foundation (to  
401 OR); the World Health Organisation (to SF); the Engineering and Physical Sciences Research Council  
402 (EPSRC) through the EPSRC Centre for Doctoral Training in Modern Statistics and Statistical Machine  
403 Learning at Imperial College London and Oxford University (EP/S023151/1 to A. Gandy); the Imperial  
404 College London President's PhD Scholarship fund to YC; Imperial College London Undergraduate  
405 Research Bursaries to LG and VKM; and London Mathematical Society Undergraduate Research  
406 Bursary to DW (URB-2023-86). The funders had no role in study design, data collection and analysis,  
407 decision to publish or preparation of the manuscript. The findings and conclusions in this report are  
408 those of the author(s) and do not necessarily represent the official position of the Centers for  
409 Disease Control and Prevention.

410

411 **Competing interests:**

412 OR reports grants from the Bill & Melinda Gates Foundation, the EPSRC, the AIDSFonds, and the NIH  
413 during the conduct of this study.

414

415 **Copyright statement:**

416 For the purpose of open access, the authors have applied a 'Creative Commons Attribution' (CC BY)  
417 license to any Author Accepted Manuscript version arising.

418

419 **Author contributions:**

420 AV, SH and OR designed the study; AV, YC, ST, AB, LG, VKM, DW, SH and OR performed the analysis;  
421 LG, VKM, DW, JTU and SF checked analysis; AV, LC, LS, FA, GM, JL, LR, RN, CAN, SF, JTU, SH and OR  
422 oversaw data interpretation; AV, YC, ST, SH and OR wrote the first draft; All authors discussed the  
423 first draft and contributed to the final manuscript.

424

## 425 References

426

- 427 1. Bhutta ZA, Bhavnani S, Betancourt TS, Tomlinson M, Patel V. Adverse childhood  
428 experiences and lifelong health. *Nat Med*. Jul 2023;29(7):1639-1648. doi:10.1038/s41591-  
429 023-02426-0
- 430 2. Hillis SD, Unwin HJT, Chen Y, et al. Global minimum estimates of children affected  
431 by COVID-19-associated orphanhood and deaths of caregivers: a modelling study. *Lancet*.  
432 Jul 31 2021;398(10298):391-402. doi:10.1016/S0140-6736(21)01253-8
- 433 3. Kidman R, Margolis R, Smith-Greenaway E, Verdery AM. Estimates and Projections  
434 of COVID-19 and Parental Death in the US. *JAMA Pediatr*. Apr 5  
435 2021;doi:10.1001/jamapediatrics.2021.0161
- 436 4. Sadruddin AFA, Ponguta LA, Zonderman AL, Wiley KS, Grimshaw A, Panter-Brick  
437 C. How do grandparents influence child health and development? A systematic review. *Soc*  
438 *Sci Med*. Oct 2019;239:112476. doi:10.1016/j.socscimed.2019.112476
- 439 5. Sherr L, Varrall R, Mueller J, et al. A systematic review on the meaning of the  
440 concept 'AIDS Orphan': confusion over definitions and implications for care. *AIDS Care*.  
441 May 2008;20(5):527-36. doi:10.1080/09540120701867248
- 442 6. Unwin HJT, Hillis S, Cluver L, et al. Global, regional, and national minimum  
443 estimates of children affected by COVID-19-associated orphanhood and caregiver death, by  
444 age and family circumstance up to Oct 31, 2021: an updated modelling study. *Lancet Child*  
445 *Adolesc Health*. Apr 2022;6(4):249-259. doi:10.1016/S2352-4642(22)00005-0
- 446 7. California Surgeon General's Clinical Advisory Committee. Adverse Childhood  
447 Experience Questionnaire for Adults. California Surgeon General's Clinical Advisory  
448 Committee. Updated 2020. Accessed Nov 23, 2023. [https://www.acesaware.org/wp-](https://www.acesaware.org/wp-content/uploads/2022/07/ACE-Questionnaire-for-Adults-Identified-English-rev.7.26.22.pdf)  
449 [content/uploads/2022/07/ACE-Questionnaire-for-Adults-Identified-English-rev.7.26.22.pdf](https://www.acesaware.org/wp-content/uploads/2022/07/ACE-Questionnaire-for-Adults-Identified-English-rev.7.26.22.pdf)
- 450 8. Kessler RC, McLaughlin KA, Green JG, et al. Childhood adversities and adult  
451 psychopathology in the WHO World Mental Health Surveys. *The British Journal of*  
452 *Psychiatry*. 2010;197(5):378-385. doi:10.1192/bjp.bp.110.080499
- 453 9. Atwoli L, Stein DJ, King A, et al. Posttraumatic stress disorder associated with  
454 unexpected death of a loved one: Cross-national findings from the world mental health  
455 surveys. *Depress Anxiety*. Apr 2017;34(4):315-326. doi:10.1002/da.22579
- 456 10. Children's Collaborative. About Children's Collaborative. Children's Collaborative.  
457 Accessed Sep 20, 2023. <https://www.childrenscollaborative.us/about#crisis>
- 458 11. Farella Guzzo M, Gobbi G. Parental Death During Adolescence: A Review of the  
459 Literature. *Omega (Westport)*. Sep 2023;87(4):1207-1237. doi:10.1177/00302228211033661
- 460 12. Kentor RA, Kaplow JB. Supporting children and adolescents following parental  
461 bereavement: guidance for health-care professionals. *Lancet Child Adolesc Health*. Dec  
462 2020;4(12):889-898. doi:10.1016/S2352-4642(20)30184-X
- 463 13. Gibbs DJ, Villodas ML, Kainz K, Francis AM. Insecure housing, substance abuse,  
464 and incarceration among emerging adults aging out of foster care: Examining associations  
465 with legal orphan status. *Children and Youth Services Review*. 2023/02/01/ 2023;145:106805.  
466 doi:<https://doi.org/10.1016/j.chilyouth.2022.106805>
- 467 14. Black RE, Liu L, Hartwig FP, et al. Health and development from preconception to 20  
468 years of age and human capital. *Lancet*. Apr 30 2022;399(10336):1730-1740.  
469 doi:10.1016/S0140-6736(21)02533-2
- 470 15. de Walque D. Conflicts, epidemics, and orphanhood: The impact of extreme events  
471 on the health and educational achievements of children. In: Alderman H, ed. *No Small Matter*  
472 *The Impact of Poverty, Shocks, and Human Capital Investments in Early Childhood*  
473 *Development*. World Bank; 2011:99-109:chap 3.

- 474 16. Ahmad FB, Cisewski JA, Xu J, Anderson RN. Provisional Mortality Data - United  
475 States, 2022. *MMWR Morb Mortal Wkly Rep*. May 5 2023;72(18):488-492.  
476 doi:10.15585/mmwr.mm7218a3
- 477 17. Bergman AS, Axberg U, Hanson E. When a parent dies - a systematic review of the  
478 effects of support programs for parentally bereaved children and their caregivers. *BMC*  
479 *Palliat Care*. Aug 10 2017;16(1):39. doi:10.1186/s12904-017-0223-y
- 480 18. Ahmad FB. Provisional Mortality Data—United States, 2021. *Morbidity and*  
481 *Mortality Weekly Report*. 2022;71
- 482 19. Hillis SD, Blenkinsop A, Villaveces A, et al. COVID-19-Associated Orphanhood and  
483 Caregiver Death in the United States. *Pediatrics*. Oct 7 2021;doi:10.1542/peds.2021-053760
- 484 20. U.S. Department of Health and Human Services. *Services and Supports for Longer-*  
485 *Term Impacts of COVID-19*. 2022. Aug. [https://www.covid.gov/assets/files/Services-and-](https://www.covid.gov/assets/files/Services-and-Supports-for-Longer-Term-Impacts-of-COVID-19-08012022.pdf)  
486 [Supports-for-Longer-Term-Impacts-of-COVID-19-08012022.pdf](https://www.covid.gov/assets/files/Services-and-Supports-for-Longer-Term-Impacts-of-COVID-19-08012022.pdf)
- 487 21. The White House. National COVID-19 Preparedness Plan. The White House.  
488 Accessed Sep 20, 2023. <https://www.whitehouse.gov/covidplan/>
- 489 22. State of California. Hope, Opportunity, Perseverance, and Empowerment (HOPE) for  
490 Children Act of 2022. In: California So, editor. Sacramento, CA: Senate of California; 2022.
- 491 23. Guida F, Kidman R, Ferlay J, et al. Global and regional estimates of orphans  
492 attributed to maternal cancer mortality in 2020. *Nat Med*. Dec 2022;28(12):2563-2572.  
493 doi:10.1038/s41591-022-02109-2
- 494 24. Hillis S, Ntwali N'konzi J, Msemburi W, et al. Orphanhood and caregiver loss among  
495 children based on new global excess COVID-19 death estimates. . *JAMA Pediatrics*.  
496 2022;(Online.)
- 497 25. COVID-19 Mental Disorders Collaborators. Global prevalence and burden of  
498 depressive and anxiety disorders in 204 countries and territories in 2020 due to the COVID-  
499 19 pandemic. *Lancet*. Nov 6 2021;398(10312):1700-1712. doi:10.1016/s0140-  
500 6736(21)02143-7
- 501 26. Triggs A, Kharas H. The triple economic shock of COVID-19 and priorities for an  
502 emergency G-20 leaders meeting. Brookings Institution. Updated March 17. Accessed Nov,  
503 2023. [https://www.brookings.edu/articles/the-triple-economic-shock-of-covid-19-and-](https://www.brookings.edu/articles/the-triple-economic-shock-of-covid-19-and-priorities-for-an-emergency-g-20-leaders-meeting/)  
504 [priorities-for-an-emergency-g-20-leaders-meeting/](https://www.brookings.edu/articles/the-triple-economic-shock-of-covid-19-and-priorities-for-an-emergency-g-20-leaders-meeting/)
- 505 27. Lee LM, Fleming PL. Estimated number of children left motherless by AIDS in the  
506 United States, 1978-1998. *J Acquir Immune Defic Syndr*. Oct 1 2003;34(2):231-6.  
507 doi:10.1097/00126334-200310010-00014
- 508 28. Burns M, Griese B, King S, Talmi A. Childhood Bereavement: Understanding  
509 Prevalence and Related Adversity in the United States. *Am J Orthopsychiatry*.  
510 2020;90(4):391– 405. doi:<http://dx.doi.org/10.1037/ort0000442>
- 511 29. National Bureau of Economic Research. Mortality Data - Vital Statistics NCHS  
512 Multiple Cause of Death Data. National Bureau of Economic Research. Accessed Sep 20,  
513 2023. [https://www.nber.org/research/data/mortality-data-vital-statistics-nchs-multiple-cause-](https://www.nber.org/research/data/mortality-data-vital-statistics-nchs-multiple-cause-death-data)  
514 [death-data](https://www.nber.org/research/data/mortality-data-vital-statistics-nchs-multiple-cause-death-data)
- 515 30. World Health Organization. ICD-11 Mortality tooling. World Health Organization.  
516 Updated 2023. Accessed Nov 8, 2023.  
517 <https://www.who.int/standards/classifications/classification-of-diseases/cause-of-death>
- 518 31. National Bureau of Economic Research. Vital Statistics Natality Birth Data. National  
519 Bureau of Economic Research. Accessed Sep 20, 2023.  
520 <https://www.nber.org/research/data/vital-statistics-natality-birth-data>
- 521 32. U.S. Centers for Disease Control and Prevention, CDC WONDER. Bridged-Race  
522 Resident Population Estimates United States, State and County for the years 1990 - 2020 U.S.



- 523 Centers for Disease Control and Prevention. [https://wonder.cdc.gov/wonder/help/bridged-](https://wonder.cdc.gov/wonder/help/bridged-race.html#About%201990-2020)  
524 [race.html#About%201990-2020](https://wonder.cdc.gov/wonder/help/bridged-race.html#About%201990-2020)
- 525 33. U.S. Census Bureau. Explore Census data. U.S. Census Bureau. Accessed Jun 16,  
526 2023. <https://data.census.gov/>
- 527 34. U.S. Centers for Disease Control and Prevention, CDC WONDER. Underlying Cause  
528 of Death, 1999-2020. National Center for Health Statistics. Accessed Jun 16, 2023.  
529 <https://wonder.cdc.gov/ucd-icd10.html>
- 530 35. U.S. Centers for Disease Control and Prevention, CDC WONDER. Provisional  
531 Mortality Statistics, 2018 through Last Month Request Form [16/06/2023]. . U.S. Centers for  
532 Disease Control and Prevention. Accessed Jun 16, 2023.  
533 <https://wonder.cdc.gov/controller/datarequest/D176>
- 534 36. Osborne J, Chosewood LC, Howard J. The COVID-19 Pandemic and the Opioid  
535 Overdose Epidemic: A Perfect Storm for Workers? CDC. Accessed Sep 20, 2023.  
536 <https://blogs.cdc.gov/niosh-science-blog/2020/09/14/covid-19-and-oud/>
- 537 37. U.S. Centers for Disease Control and Prevention. Increase in Fatal Drug Overdoses  
538 Across the United States Driven by Synthetic Opioids Before and During the COVID-19  
539 Pandemic. CDC. Updated Dec 17, 2020. Accessed Sep 20, 2023.  
540 <https://emergency.cdc.gov/han/2020/han00438.asp>
- 541 38. Imperial College London. Global Orphanhood estimates real time calculator. Imperial  
542 College London. February 14, 2022. Accessed May 6, 2022.  
543 [https://imperialcollegelondon.github.io/orphanhood\\_calculator/#/country/Global](https://imperialcollegelondon.github.io/orphanhood_calculator/#/country/Global)
- 544 39. Cartus AR, Li Y, Macmadu A, et al. Forecasted and Observed Drug Overdose Deaths  
545 in the US During the COVID-19 Pandemic in 2020. *JAMA Netw Open*. Mar 1  
546 2022;5(3):e223418. doi:10.1001/jamanetworkopen.2022.3418
- 547 40. U.S. Centers for Disease Control and Prevention. Overdose Deaths Accelerating  
548 During COVID-19. CDC. Accessed Sep 20, 2023.  
549 <https://www.cdc.gov/media/releases/2020/p1218-overdose-deaths-covid-19.html>
- 550 41. U.S. Centers for Disease Control and Prevention. *CDC Health Advisory: Rising*  
551 *Numbers of Deaths Involving Fentanyl and Fentanyl Analogs, Including Carfentanil, and*  
552 *Increased Usage and Mixing with Non-opioids*. 2018. *Health Alert Network Advisory*. July  
553 11. <https://emergency.cdc.gov/han/han00413.asp>
- 554 42. U.S. Centers for Disease Control and Prevention. SUDORS Dashboard: Fatal  
555 Overdose Data. National Center for Injury Prevention and Control. Updated Dec 26, 2023.  
556 Accessed October 23, 2023. <https://www.cdc.gov/drugoverdose/fatal/dashboard/index.html>
- 557 43. U.S. Centers for Disease Control and Prevention. Racism and health. U.S. Centers for  
558 Disease Control and Prevention. Updated Sep 18 2023. Accessed Feb 20, 2024.  
559 <https://www.cdc.gov/minorityhealth/racism-disparities/index.html>
- 560 44. Trust for America's Health (TFAH). *Pain in the nation: The epidemics of alcohol,*  
561 *drug, and suicide deaths*. 2022:47. [https://www.tfah.org/wp-](https://www.tfah.org/wp-content/uploads/2022/05/TFAH_2022_PainIntheNation_Fnl.pdf)  
562 [content/uploads/2022/05/TFAH\\_2022\\_PainIntheNation\\_Fnl.pdf](https://www.tfah.org/wp-content/uploads/2022/05/TFAH_2022_PainIntheNation_Fnl.pdf)
- 563 45. Kaplow JB, Howell KH, Layne CM. Do circumstances of the death matter?  
564 Identifying socioenvironmental risks for grief-related psychopathology in bereaved youth. *J*  
565 *Trauma Stress*. Feb 2014;27(1):42-9. doi:10.1002/jts.21877
- 566 46. Better Care Network, Save the Children, The Alliance for Child Protection in  
567 Humanitarian Action, UNICEF. *Guidance for Alternative Care Provision During COVID-19*.  
568 2020:69. [https://bettercarenetwork.org/sites/default/files/2020-](https://bettercarenetwork.org/sites/default/files/2020-09/GuidanceforAlternativeCareCOVID19final.pdf)  
569 [09/GuidanceforAlternativeCareCOVID19final.pdf](https://bettercarenetwork.org/sites/default/files/2020-09/GuidanceforAlternativeCareCOVID19final.pdf)
- 570 47. Feigelman W, Rosen Z, Joiner T, Silva C, Mueller AS. Examining longer-term effects  
571 of parental death in adolescents and young adults: Evidence from the national longitudinal

- 572 survey of adolescent to adult health. *Death Stud.* Mar 2017;41(3):133-143.  
573 doi:10.1080/07481187.2016.1226990
- 574 48. Bray R. Predicting the social consequences of orphanhood in South Africa. *Afr J*  
575 *AIDS Res.* 2003;2(1):39-55. doi:10.2989/16085906.2003.9626558
- 576 49. Children's Collaborative. Utah Children's Collaborative. Children's Collaborative.  
577 Accessed Sep 20, 2023. <https://www.childrenscollaborative.us/utah>
- 578 50. Flaxman S, Kasonka L, Cluver L, et al. List child dependents on death certificates.  
579 *Science.* 2023;380(6644):467-467. doi:doi:10.1126/science.adh8784
- 580 51. World Health Organization. INSPIRE: Seven strategies for Ending Violence Against  
581 Children. Accessed Sep 9, 2020. [https://www.who.int/publications/i/item/inspire-seven-](https://www.who.int/publications/i/item/inspire-seven-strategies-for-ending-violence-against-children)  
582 [strategies-for-ending-violence-against-children](https://www.who.int/publications/i/item/inspire-seven-strategies-for-ending-violence-against-children)
- 583 52. U.S. Centers for Disease Control and Prevention. *Adverse childhood experiences*  
584 *prevention: Resource for Action. A compilation of the best available evidence.* Prevention  
585 DoV; 2019:35. [https://www.cdc.gov/violenceprevention/pdf/ACEs-Prevention-](https://www.cdc.gov/violenceprevention/pdf/ACEs-Prevention-Resource_508.pdf)  
586 [Resource\\_508.pdf](https://www.cdc.gov/violenceprevention/pdf/ACEs-Prevention-Resource_508.pdf)
- 587 53. Institute for Health Metrics and Evaluation. Estimation of total mortality due to  
588 COVID-19. Institute for Health Metrics and Evaluation (IHME). Accessed June 24, 2021.  
589 [http://www.healthdata.org/special-analysis/estimation-excess-mortality-due-covid-19-and-](http://www.healthdata.org/special-analysis/estimation-excess-mortality-due-covid-19-and-scalars-reported-covid-19-deaths)  
590 [scalars-reported-covid-19-deaths](http://www.healthdata.org/special-analysis/estimation-excess-mortality-due-covid-19-and-scalars-reported-covid-19-deaths)
- 591 54. Peppin JF, Coleman JJ, Paladini A, Varrassi G. What Your Death Certificate Says  
592 About You May Be Wrong: A Narrative Review on CDC's Efforts to Quantify Prescription  
593 Opioid Overdose Deaths. *Cureus.* Sep 2021;13(9):e18012. doi:10.7759/cureus.18012
- 594 55. Winstanley EL, Stover AN. The Impact of the Opioid Epidemic on Children and  
595 Adolescents. *Clin Ther.* Sep 2019;41(9):1655-1662. doi:10.1016/j.clinthera.2019.06.003
- 596 56. Hillis S, Unwin J, Cluver L, et al. *Children : the hidden pandemic 2021 : a joint*  
597 *report of COVID-19- associated orphanhood and a strategy for action.* 2021. July 19.  
598 <https://stacks.cdc.gov/view/cdc/108199>  
599  
600

Figures and Tables

Table 1 - Trends in All-cause Orphanhood and Caregiver (Co-Residing/custodial Grandparent) Loss from 2000 to 2021, before and during the COVID-19 pandemic

|                                                                           | Before the COVID-19 pandemic                     |                                        |                                        | Since the COVID-19 pandemic        |                                        |                                        |                               |                               |
|---------------------------------------------------------------------------|--------------------------------------------------|----------------------------------------|----------------------------------------|------------------------------------|----------------------------------------|----------------------------------------|-------------------------------|-------------------------------|
|                                                                           | 2000<br>(Number<br>of<br>Children)               | 2019<br>(Number<br>of<br>Children)     | 2000-2019<br>change                    | 2020<br>(Number<br>of<br>Children) | 2021<br>(Number<br>of<br>Children)     | 2019-2021<br>change                    | 2000-2021<br>change           |                               |
| <b>Incidence (n, (95% uncertainty interval))</b>                          |                                                  |                                        |                                        |                                    |                                        |                                        |                               |                               |
|                                                                           | <b>Orphanhood</b>                                | 261,633<br>(260,485,<br>262,656)       | 291,574<br>(290,613,<br>292,657)       | +11.4%<br>(+10.9%,<br>+12.1%)      | 359,431<br>(358,301,<br>360,531)       | 406,733<br>(405,437,<br>407,928)       | +39.5%<br>(+38.8%,<br>+40.1%) | +55.5%<br>(+54.7%,<br>+56.3%) |
|                                                                           | <b>Orphanhood<br/>and<br/>Caregiver<br/>Loss</b> | 333,959<br>(332,701,<br>335,049)       | 372,869<br>(371,737,<br>374,132)       | +11.7%<br>(+11.2%,<br>+12.2%)      | 454,403<br>(453,107,<br>455,706)       | 498,249<br>(496,938,<br>499,639)       | +33.6%<br>(+33.1%,<br>+34.2%) | +49.2%<br>(+48.5%,<br>+49.9%) |
| <b>Incidence rate per 100 children (rate, (95% uncertainty interval))</b> |                                                  |                                        |                                        |                                    |                                        |                                        |                               |                               |
|                                                                           | <b>Orphanhood</b>                                | 0.36 (0.36,<br>0.36)                   | 0.40 (0.40,<br>0.40)                   | +10.2%<br>(+9.9%,<br>+11.1%)       | 0.49 (0.49,<br>0.50)                   | 0.59 (0.58,<br>0.59)                   | +46.9%<br>(+46.2%,<br>+47.6%) | +62.2%<br>(+61.3%,<br>+63.1%) |
|                                                                           | <b>Orphanhood<br/>and<br/>Caregiver<br/>Loss</b> | 0.46 (0.46,<br>0.46)                   | 0.51 (0.51,<br>0.51)                   | +10.6%<br>(+10.2%,<br>+11.1%)      | 0.62 (0.62,<br>0.63)                   | 0.72 (0.72,<br>0.72)                   | +40.8%<br>(+40.1%,<br>+41.3%) | +55.6%<br>(+54.9%,<br>+56.3%) |
| <b>Prevalence (n, (95% uncertainty interval))</b>                         |                                                  |                                        |                                        |                                    |                                        |                                        |                               |                               |
|                                                                           | <b>Orphanhood</b>                                | 2,228,940<br>(2,225,912,<br>2,232,100) | 2,174,707<br>(2,172,340,<br>2,177,566) | -2.4 (-2.6, -<br>2.3)              | 2,266,808<br>(2,264,259,<br>2,269,533) | 2,394,604<br>(2,391,948,<br>2,397,308) | +10.1%<br>(+10.0%,<br>+10.2%) | +7.4%<br>(+7.2%,<br>+7.6%)    |

|                                                                            |                                      |                                     |                                     |                   |                                     |                                     |                            |                            |
|----------------------------------------------------------------------------|--------------------------------------|-------------------------------------|-------------------------------------|-------------------|-------------------------------------|-------------------------------------|----------------------------|----------------------------|
|                                                                            | <b>Orphanhood and Caregiver Loss</b> | 2,738,807<br>(2,735,607, 2,742,282) | 2,712,927<br>(2,710,251, 2,715,769) | -0.9 (-1.1, -0.8) | 2,824,422<br>(2,821,579, 2,827,337) | 2,966,008<br>(2,963,030, 2,968,931) | +9.3%<br>(+9.3%, +9.4%)    | +8.3%<br>(+8.1%, +8.5%)    |
| <b>Prevalence rate per 100 children (rate, (95% uncertainty interval))</b> |                                      |                                     |                                     |                   |                                     |                                     |                            |                            |
|                                                                            | <b>Orphanhood</b>                    | 3.08 (3.08, 3.08)                   | 2.98 (2.97, 2.98)                   | -3.4 (-3.6, -3.2) | 3.11 (3.11, 3.12)                   | 3.45 (3.45, 3.45)                   | +16.0%<br>(+15.9%, +16.1%) | +12.0%<br>(+11.8%, +12.3%) |
|                                                                            | <b>Orphanhood and Caregiver Loss</b> | 3.78 (3.78, 3.79)                   | 3.71 (3.71, 3.72)                   | -1.9 (-2.1, -1.8) | 3.88 (3.87, 3.88)                   | 4.27 (4.27, 4.28)                   | +15.1%<br>(+15.1%, +15.2%) | +12.9%<br>(+12.8%, +13.1%) |

**Figure 1. Magnitude of children experiencing orphanhood in the United States.** (A) Estimated number of U.S. children newly experiencing orphanhood by any cause and over time. (B) Estimated number of U.S. children experiencing orphanhood in their lifetime (over the past 18 years) by any cause and over time. (C) Incidence rates of orphanhood among US children. (D) Prevalence rates of orphanhood among US children. (E) Main contributors to children experiencing orphanhood (parental death) versus the main contributors to adult deaths in 2021.

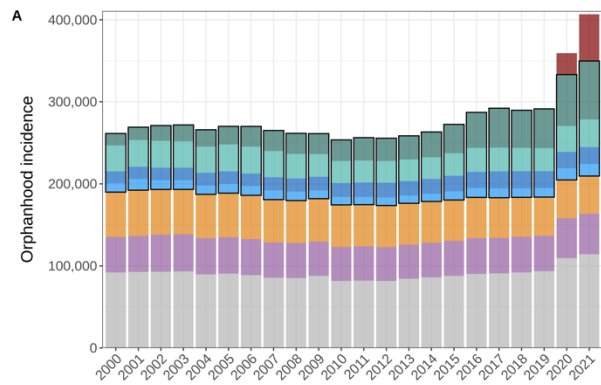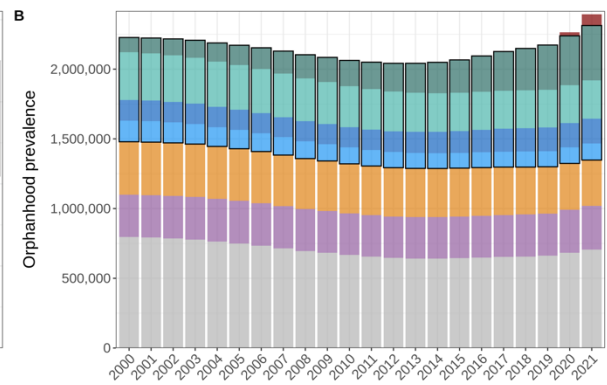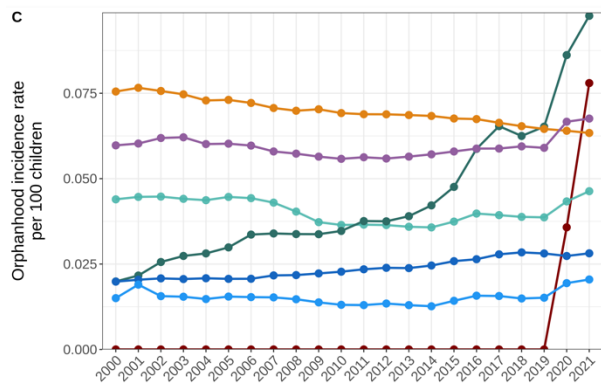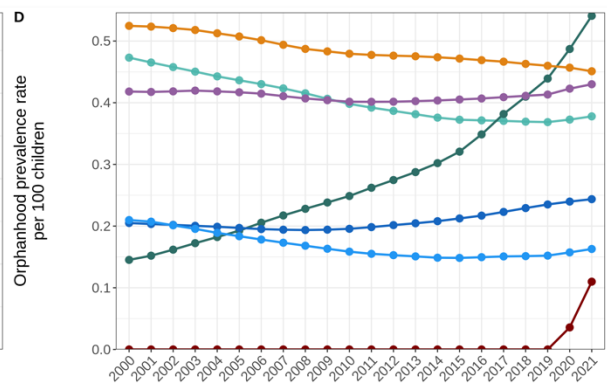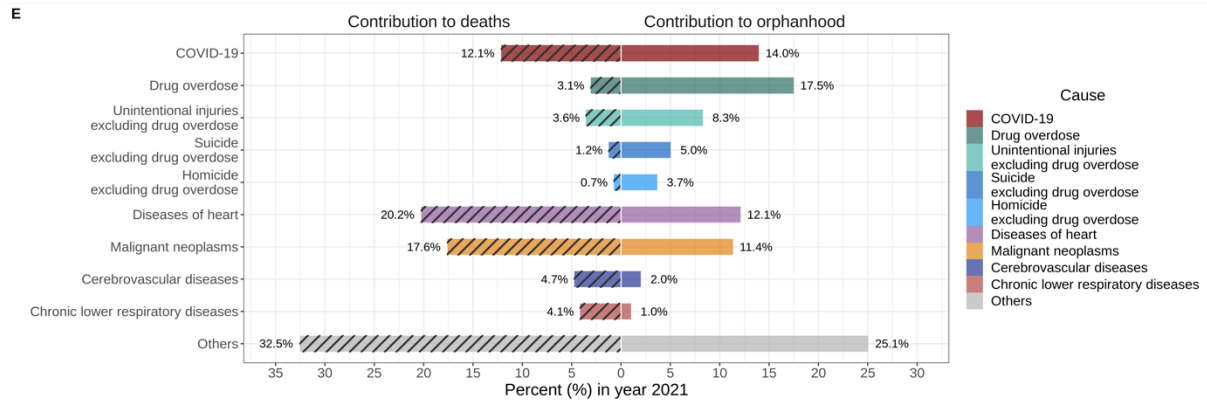

**Figure 2. Time trends in orphanhood in the United States by age of child, standardized race & ethnicity, and cause.** (A) Prevalence rates of orphanhood among US children aged 0-4 years, 5-9 years, and 10-17 years. (B) Prevalence rates of orphanhood among children by race and ethnicity of the deceased parent. (C) Prevalence rate of all-cause orphanhood by age and standardized race & ethnicity in 2021. (D) Time trends in sex and cause-specific incidence rates of orphanhood according to race among US children. On the y-axis are shown 2021 incidence rates of orphanhood among US children, by sex and cause of death of the deceased parent. On the x-axis are shown the differences in incidence rates in 2021 minus those in 2000, with positive differences indicating increases in incidence rates and negative differences indicating decreases in incidence rates. Numbers show the cause of orphanhood. Shapes show the sex of the deceased parent. The size of points indicates the contribution of each cause to new cases of orphanhood respectively among US children in 2021.

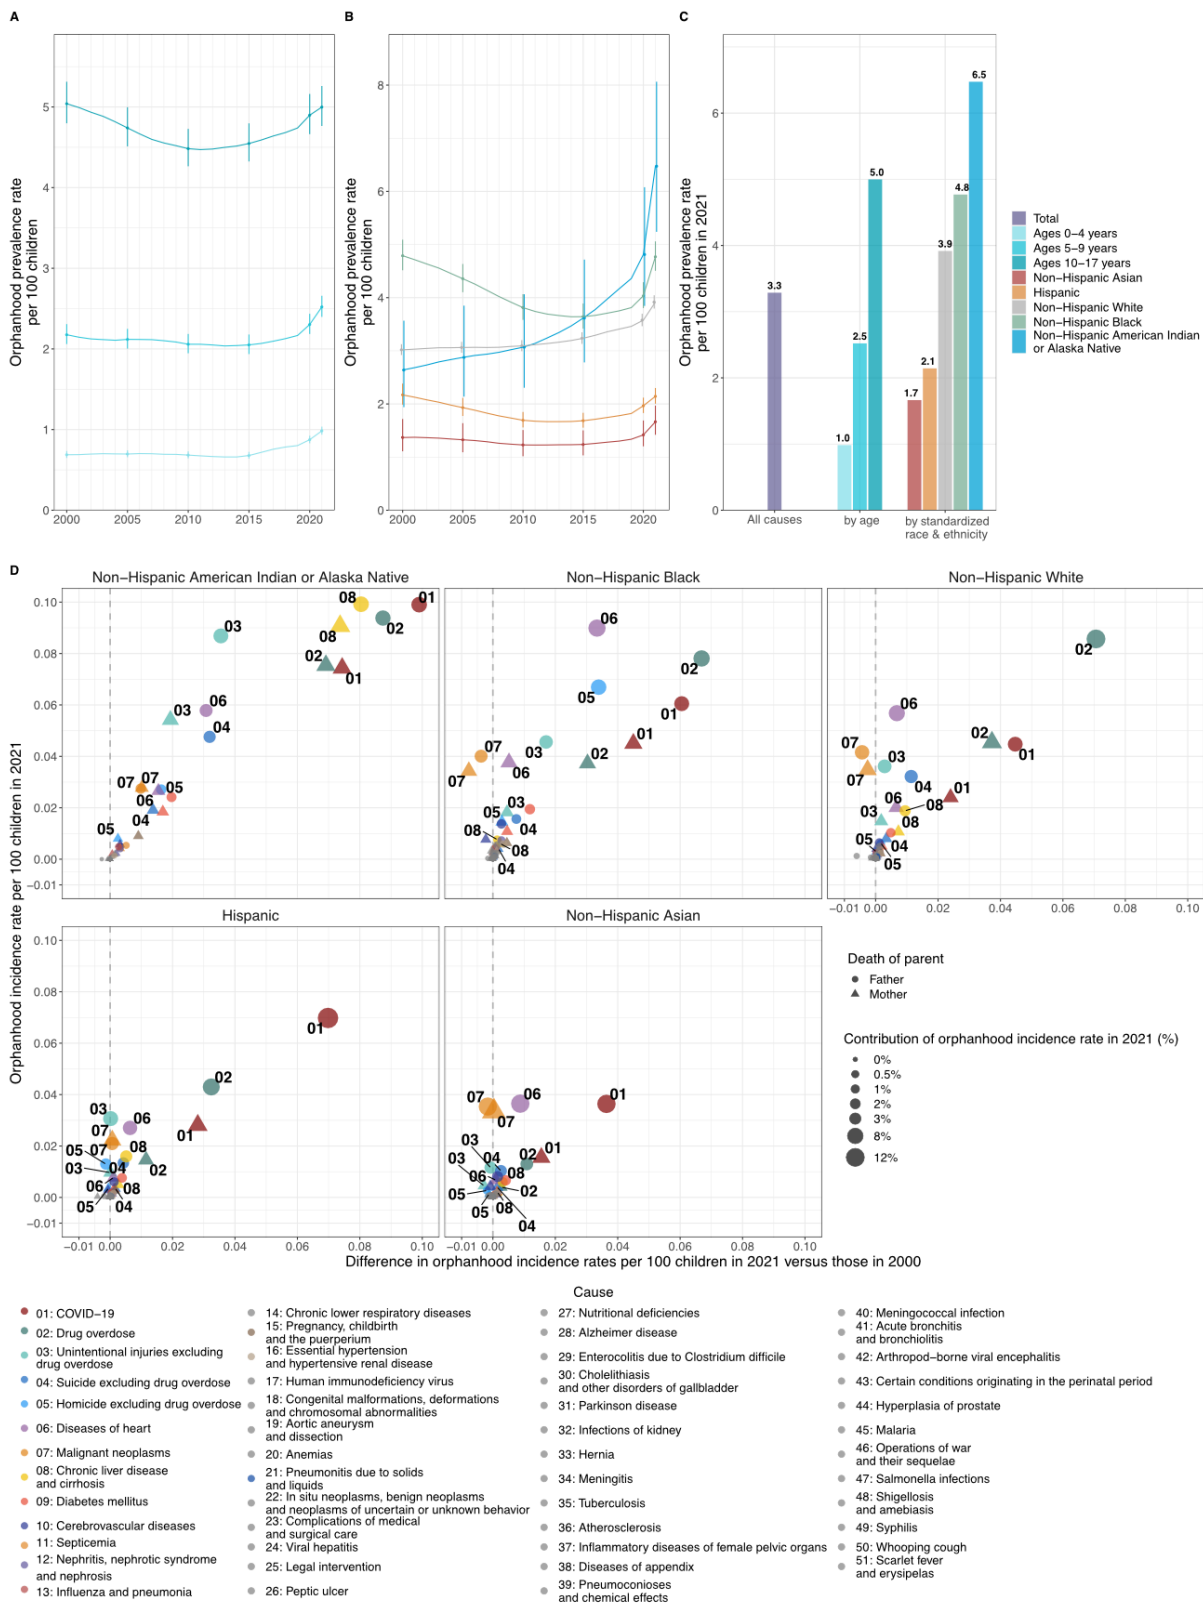



**Table 2. Primary contributors to orphanhood in each US state in 2021.**

|            | Orphanhood in 2021            |                                                            |                                                        |                                                                    |                               |                                                             |                                                                    |                                                                    |
|------------|-------------------------------|------------------------------------------------------------|--------------------------------------------------------|--------------------------------------------------------------------|-------------------------------|-------------------------------------------------------------|--------------------------------------------------------------------|--------------------------------------------------------------------|
|            | Orphanhood Incidence in 2021  |                                                            |                                                        |                                                                    | Orphanhood Prevalence in 2021 |                                                             |                                                                    |                                                                    |
| U.S. state | Incidence<br><br>(n, 95% UI)  | Incidence rate<br>per 100<br>children<br>(rate, 95%<br>UI) | First ranked<br>cause<br><br>(name,<br>% contribution) | Second ranked<br>cause<br><br>(name,<br>% contribution)            | Prevalence<br><br>(n, 95% UI) | Prevalence rate<br>per 100<br>children<br>(rate, 95%<br>UI) | First ranked<br>cause<br><br>(name,<br>% contribution)             | Second ranked<br>cause<br><br>(name,<br>% contribution)            |
| Alabama    | 7,991<br>(7,585,<br>8,397)    | 0.71 (0.68,<br>0.75)                                       | Diseases of<br>heart<br>(16.4%)                        | COVID-19<br>(16.2%)                                                | 45,696<br>(42,504,<br>49,079) | 4.07 (3.79,<br>4.37)                                        | Diseases of<br>heart<br>(16.9%)                                    | Unintentional<br>injuries<br>excluding drug<br>overdose<br>(14.0%) |
| Alaska     | 1,122 (795,<br>1,478)         | 0.63 (0.44,<br>0.82)                                       | Drug overdose<br>(16.0%)                               | Unintentional<br>injuries<br>excluding drug<br>overdose<br>(15.2%) | 5,922<br>(3,970,<br>9,170)    | 3.30 (2.21,<br>5.11)                                        | Unintentional<br>injuries<br>excluding drug<br>overdose<br>(23.8%) | Suicide<br>excluding drug<br>overdose<br>(10.7%)                   |
| Arizona    | 10,898<br>(10,511,<br>11,250) | 0.68 (0.65,<br>0.70)                                       | COVID-19<br>(17.8%)                                    | Drug overdose<br>(16.5%)                                           | 59,002<br>(55,837,<br>62,261) | 3.66 (3.46,<br>3.86)                                        | Drug overdose<br>(16.4%)                                           | Unintentional<br>injuries<br>excluding drug<br>overdose<br>(12.9%) |

|                         |                               |                      |                                 |                                   |                                  |                      |                                                                    |                                                                    |
|-------------------------|-------------------------------|----------------------|---------------------------------|-----------------------------------|----------------------------------|----------------------|--------------------------------------------------------------------|--------------------------------------------------------------------|
| Arkansas                | 4,461<br>(4,053,<br>4,945)    | 0.63 (0.58,<br>0.70) | Diseases of<br>heart<br>(15.2%) | COVID-19<br>(13.2%)               | 25,644<br>(22,348,<br>29,481)    | 3.65 (3.18,<br>4.19) | Unintentional<br>injuries<br>excluding drug<br>overdose<br>(16.6%) | Diseases of<br>heart<br>(15.4%)                                    |
| California              | 45,004<br>(45,713,<br>44,534) | 0.51 (0.52,<br>0.51) | COVID-19<br>(16.5%)             | Drug overdose<br>(14.6%)          | 264,622<br>(268,326,<br>261,397) | 3.02 (3.06,<br>2.98) | Malignant<br>neoplasms<br>(16.8%)                                  | Diseases of<br>heart<br>(12.8%)                                    |
| Colorado                | 6,587<br>(6,178,<br>6,985)    | 0.53 (0.50,<br>0.56) | Drug overdose<br>(18.0%)        | COVID-19<br>(10.4%)               | 37,868<br>(34,890,<br>41,412)    | 3.05 (2.81,<br>3.33) | Drug overdose<br>(16.6%)                                           | Suicide<br>excluding drug<br>overdose<br>(13.5%)                   |
| Connecticut             | 3,330<br>(2,922,<br>3,741)    | 0.46 (0.40,<br>0.51) | Drug overdose<br>(29.0%)        | Malignant<br>neoplasms<br>(13.3%) | 20,874<br>(17,911,<br>24,220)    | 2.86 (2.45,<br>3.32) | Drug overdose<br>(26.5%)                                           | Malignant<br>neoplasms<br>(14.9%)                                  |
| Delaware                | 962 (667,<br>1,279)           | 0.46 (0.32,<br>0.61) | Drug overdose<br>(34.4%)        | Malignant<br>neoplasms<br>(9.7%)  | 5,467<br>(3,582,<br>7,985)       | 2.62 (1.72,<br>3.83) | Drug overdose<br>(29.4%)                                           | Unintentional<br>injuries<br>excluding drug<br>overdose<br>(10.2%) |
| District of<br>Columbia | 612 (432,<br>823)             | 0.49 (0.34,<br>0.65) | Drug overdose<br>(18.3%)        | Diseases of<br>heart<br>(10.8%)   | 3,828<br>(2,465,<br>5,519)       | 3.04 (1.96,<br>4.39) | Diseases of<br>heart<br>(13.0%)                                    | Drug overdose<br>(12.4%)                                           |
| Florida                 | 28,456<br>(28,600,<br>28,393) | 0.66 (0.67,<br>0.66) | Drug overdose<br>(19.0%)        | COVID-19<br>(17.9%)               | 159,629<br>(159,761,<br>159,719) | 3.72 (3.72,<br>3.72) | Drug overdose<br>(18.2%)                                           | Malignant<br>neoplasms<br>(14.1%)                                  |

|          |                               |                      |                                   |                                   |                               |                      |                                                                    |                                                  |
|----------|-------------------------------|----------------------|-----------------------------------|-----------------------------------|-------------------------------|----------------------|--------------------------------------------------------------------|--------------------------------------------------|
| Georgia  | 15,723<br>(15,459,<br>16,039) | 0.62 (0.61,<br>0.64) | COVID-19<br>(16.5%)               | Diseases of<br>heart<br>(15.2%)   | 87,557<br>(84,749,<br>90,515) | 3.47 (3.36,<br>3.59) | Diseases of<br>heart<br>(15.6%)                                    | Malignant<br>neoplasms<br>(13.0%)                |
| Hawaii   | 1,231 (950,<br>1,580)         | 0.40 (0.31,<br>0.52) | Malignant<br>neoplasms<br>(16.2%) | Diseases of<br>heart<br>(15.4%)   | 7,692<br>(5,510,<br>10,706)   | 2.53 (1.81,<br>3.52) | Diseases of<br>heart<br>(15.3%)                                    | Malignant<br>neoplasms<br>(15.3%)                |
| Idaho    | 1,940<br>(1,544,<br>2,372)    | 0.41 (0.33,<br>0.51) | COVID-19<br>(14.5%)               | Drug overdose<br>(13.0%)          | 10,474<br>(7,785,<br>14,079)  | 2.23 (1.66,<br>3.00) | Unintentional<br>injuries<br>excluding drug<br>overdose<br>(20.3%) | Suicide<br>excluding drug<br>overdose<br>(13.0%) |
| Illinois | 13,831<br>(13,528,<br>14,158) | 0.49 (0.48,<br>0.51) | Drug overdose<br>(16.4%)          | Diseases of<br>heart<br>(13.9%)   | 89,775<br>(87,129,<br>92,407) | 3.20 (3.11,<br>3.30) | Drug overdose<br>(16.5%)                                           | Malignant<br>neoplasms<br>(15.1%)                |
| Indiana  | 9,148<br>(8,705,<br>9,532)    | 0.58 (0.55,<br>0.60) | Drug overdose<br>(22.6%)          | Diseases of<br>heart<br>(11.9%)   | 54,889<br>(51,659,<br>58,427) | 3.46 (3.26,<br>3.68) | Drug overdose<br>(20.2%)                                           | Diseases of<br>heart<br>(13.0%)                  |
| Iowa     | 2,784<br>(2,381,<br>3,218)    | 0.38 (0.32,<br>0.44) | Diseases of<br>heart<br>(14.8%)   | Malignant<br>neoplasms<br>(12.5%) | 16,673<br>(13,710,<br>20,323) | 2.26 (1.86,<br>2.76) | Unintentional<br>injuries<br>excluding drug<br>overdose<br>(15.7%) | Malignant<br>neoplasms<br>(14.5%)                |
| Kansas   | 3,455<br>(3,041,<br>3,947)    | 0.49 (0.43,<br>0.56) | Drug overdose<br>(14.4%)          | COVID-19<br>(13.1%)               | 19,915<br>(16,740,<br>23,836) | 2.83 (2.38,<br>3.39) | Unintentional<br>injuries<br>excluding drug<br>overdose<br>(15.8%) | Malignant<br>neoplasms<br>(12.5%)                |

|               |                               |                      |                          |                                   |                               |                      |                                   |                                                                    |
|---------------|-------------------------------|----------------------|--------------------------|-----------------------------------|-------------------------------|----------------------|-----------------------------------|--------------------------------------------------------------------|
| Kentucky      | 7,183<br>(6,792,<br>7,634)    | 0.71 (0.67,<br>0.75) | Drug overdose<br>(24.3%) | Diseases of<br>heart<br>(13.9%)   | 42,002<br>(38,999,<br>45,578) | 4.13 (3.84,<br>4.49) | Drug overdose<br>(22.9%)          | Diseases of<br>heart<br>(14.0%)                                    |
| Louisiana     | 8,108<br>(7,719,<br>8,511)    | 0.75 (0.71,<br>0.79) | Drug overdose<br>(23.3%) | Diseases of<br>heart<br>(12.7%)   | 46,778<br>(43,522,<br>50,175) | 4.32 (4.02,<br>4.63) | Drug overdose<br>(17.3%)          | Diseases of<br>heart<br>(14.2%)                                    |
| Maine         | 1,347<br>(1,056,<br>1,679)    | 0.53 (0.42,<br>0.67) | Drug overdose<br>(30.1%) | Diseases of<br>heart<br>(10.8%)   | 7,245<br>(5,099,<br>9,975)    | 2.88 (2.02,<br>3.96) | Drug overdose<br>(26.8%)          | Unintentional<br>injuries<br>excluding drug<br>overdose<br>(13.6%) |
| Maryland      | 7,419<br>(6,996,<br>7,815)    | 0.54 (0.51,<br>0.57) | Drug overdose<br>(23.5%) | Diseases of<br>heart<br>(13.8%)   | 48,147<br>(44,993,<br>51,637) | 3.53 (3.30,<br>3.79) | Drug overdose<br>(22.7%)          | Diseases of<br>heart<br>(14.6%)                                    |
| Massachusetts | 6,038<br>(5,612,<br>6,457)    | 0.44 (0.41,<br>0.47) | Drug overdose<br>(27.6%) | Malignant<br>neoplasms<br>(14.7%) | 41,234<br>(38,098,<br>44,636) | 3.03 (2.80,<br>3.28) | Drug overdose<br>(27.4%)          | Malignant<br>neoplasms<br>(15.8%)                                  |
| Michigan      | 12,179<br>(11,820,<br>12,509) | 0.57 (0.55,<br>0.58) | Drug overdose<br>(17.0%) | Diseases of<br>heart<br>(13.6%)   | 75,255<br>(72,209,<br>78,059) | 3.49 (3.35,<br>3.62) | Drug overdose<br>(17.9%)          | Diseases of<br>heart<br>(14.4%)                                    |
| Minnesota     | 5,403<br>(4,951,<br>5,883)    | 0.41 (0.38,<br>0.45) | Drug overdose<br>(17.6%) | Malignant<br>neoplasms<br>(13.8%) | 30,442<br>(27,178,<br>34,423) | 2.31 (2.06,<br>2.61) | Malignant<br>neoplasms<br>(16.8%) | Drug overdose<br>(14.6%)                                           |

|                  |                             |                      |                                                                    |                                                                    |                               |                      |                                                                    |                                                  |
|------------------|-----------------------------|----------------------|--------------------------------------------------------------------|--------------------------------------------------------------------|-------------------------------|----------------------|--------------------------------------------------------------------|--------------------------------------------------|
| Mississippi      | 5,251<br>(4,791,<br>5,668)  | 0.76 (0.69,<br>0.82) | COVID-19<br>(15.0%)                                                | Diseases of<br>heart<br>(14.7%)                                    | 30,280<br>(26,942,<br>33,913) | 4.37 (3.89,<br>4.89) | Unintentional<br>injuries<br>excluding drug<br>overdose<br>(16.7%) | Diseases of<br>heart<br>(15.5%)                  |
| Missouri         | 8,128<br>(7,727,<br>8,525)  | 0.59 (0.56,<br>0.62) | Drug overdose<br>(18.3%)                                           | Diseases of<br>heart<br>(13.5%)                                    | 49,665<br>(46,695,<br>52,986) | 3.59 (3.37,<br>3.83) | Drug overdose<br>(18.1%)                                           | Diseases of<br>heart<br>(13.9%)                  |
| Montana          | 1,216 (912,<br>1,568)       | 0.52 (0.39,<br>0.67) | Unintentional<br>injuries<br>excluding drug<br>overdose<br>(17.3%) | Suicide<br>excluding drug<br>overdose<br>(10.7%)                   | 6,553<br>(4,473,<br>9,605)    | 2.79 (1.90,<br>4.09) | Unintentional<br>injuries<br>excluding drug<br>overdose<br>(24.6%) | Suicide<br>excluding drug<br>overdose<br>(12.7%) |
| Nebraska         | 1,809<br>(1,412,<br>2,261)  | 0.37 (0.29,<br>0.47) | Malignant<br>neoplasms<br>(13.7%)                                  | Unintentional<br>injuries<br>excluding drug<br>overdose<br>(12.1%) | 10,680<br>(8,043,<br>14,384)  | 2.21 (1.67,<br>2.98) | Unintentional<br>injuries<br>excluding drug<br>overdose<br>(18.6%) | Malignant<br>neoplasms<br>(14.3%)                |
| Nevada           | 4,034<br>(3,650,<br>4,450)  | 0.58 (0.52,<br>0.64) | COVID-19<br>(19.3%)                                                | Diseases of<br>heart<br>(13.6%)                                    | 21,946<br>(18,876,<br>25,409) | 3.14 (2.70,<br>3.64) | Drug overdose<br>(15.5%)                                           | Diseases of<br>heart<br>(14.8%)                  |
| New<br>Hampshire | 1,094 (814,<br>1,405)       | 0.43 (0.32,<br>0.55) | Drug overdose<br>(25.4%)                                           | Malignant<br>neoplasms<br>(10.9%)                                  | 6,869<br>(4,778,<br>9,552)    | 2.68 (1.86,<br>3.73) | Drug overdose<br>(30.8%)                                           | Malignant<br>neoplasms<br>(11.4%)                |
| New Jersey       | 9,644<br>(9,235,<br>10,114) | 0.48 (0.46,<br>0.50) | Drug overdose<br>(21.9%)                                           | Malignant<br>neoplasms<br>(13.7%)                                  | 63,595<br>(60,303,<br>67,269) | 3.14 (2.98,<br>3.32) | Drug overdose<br>(21.5%)                                           | Malignant<br>neoplasms<br>(15.3%)                |

|                |                               |                      |                                                                    |                                   |                                  |                      |                                                                    |                                                                    |
|----------------|-------------------------------|----------------------|--------------------------------------------------------------------|-----------------------------------|----------------------------------|----------------------|--------------------------------------------------------------------|--------------------------------------------------------------------|
| New Mexico     | 4,137<br>(3,701,<br>4,558)    | 0.87 (0.78,<br>0.96) | Drug overdose<br>(16.7%)                                           | COVID-19<br>(16.2%)               | 21,632<br>(18,554,<br>25,154)    | 4.57 (3.92,<br>5.32) | Drug overdose<br>(17.6%)                                           | Unintentional<br>injuries<br>excluding drug<br>overdose<br>(15.1%) |
| New York       | 19,199<br>(19,000,<br>19,436) | 0.47 (0.46,<br>0.47) | Drug overdose<br>(19.2%)                                           | Malignant<br>neoplasms<br>(14.8%) | 124,546<br>(122,607,<br>126,477) | 3.03 (2.98,<br>3.07) | Malignant<br>neoplasms<br>(17.8%)                                  | Drug overdose<br>(15.9%)                                           |
| North Carolina | 14,097<br>(13,786,<br>14,457) | 0.61 (0.60,<br>0.63) | Drug overdose<br>(20.5%)                                           | COVID-19<br>(12.4%)               | 79,120<br>(76,394,<br>82,029)    | 3.44 (3.32,<br>3.56) | Drug overdose<br>(17.7%)                                           | Malignant<br>neoplasms<br>(12.6%)                                  |
| North Dakota   | 695 (469,<br>1,081)           | 0.37 (0.25,<br>0.58) | Unintentional<br>injuries<br>excluding drug<br>overdose<br>(15.0%) | Drug overdose<br>(10.2%)          | 3,808<br>(2,409,<br>6,887)       | 2.05 (1.30,<br>3.71) | Unintentional<br>injuries<br>excluding drug<br>overdose<br>(17.7%) | Suicide<br>excluding drug<br>overdose<br>(7.9%)                    |
| Ohio           | 15,767<br>(15,525,<br>16,051) | 0.61 (0.60,<br>0.62) | Drug overdose<br>(24.9%)                                           | Diseases of<br>heart<br>(12.2%)   | 97,161<br>(94,914,<br>99,413)    | 3.73 (3.64,<br>3.82) | Drug overdose<br>(26.0%)                                           | Diseases of<br>heart<br>(12.9%)                                    |
| Oklahoma       | 6,119<br>(5,684,<br>6,576)    | 0.64 (0.59,<br>0.68) | COVID-19<br>(16.9%)                                                | Diseases of<br>heart<br>(14.3%)   | 36,240<br>(32,901,<br>39,983)    | 3.77 (3.42,<br>4.16) | Unintentional<br>injuries<br>excluding drug<br>overdose<br>(14.8%) | Diseases of<br>heart<br>(14.7%)                                    |

|                |                               |                      |                                                      |                                                                    |                                  |                      |                                                                    |                                                                    |
|----------------|-------------------------------|----------------------|------------------------------------------------------|--------------------------------------------------------------------|----------------------------------|----------------------|--------------------------------------------------------------------|--------------------------------------------------------------------|
| Oregon         | 4,153<br>(3,757,<br>4,561)    | 0.48 (0.44,<br>0.53) | Drug overdose<br>(15.7%)                             | Malignant<br>neoplasms<br>(13.3%)                                  | 22,994<br>(19,901,<br>26,282)    | 2.67 (2.31,<br>3.05) | Malignant<br>neoplasms<br>(14.9%)                                  | Unintentional<br>injuries<br>excluding drug<br>overdose<br>(13.6%) |
| Pennsylvania   | 14,609<br>(14,349,<br>14,918) | 0.55 (0.54,<br>0.56) | Drug overdose<br>(24.7%)                             | Malignant<br>neoplasms<br>(12.0%)                                  | 95,425<br>(93,303,<br>97,704)    | 3.57 (3.49,<br>3.65) | Drug overdose<br>(26.3%)                                           | Malignant<br>neoplasms<br>(13.2%)                                  |
| Rhode Island   | 791 (565,<br>1,048)           | 0.38 (0.27,<br>0.50) | Drug overdose<br>(35.7%)                             | Diseases of<br>heart<br>(9.6%)                                     | 4,826<br>(3,084,<br>7,091)       | 2.31 (1.48,<br>3.40) | Drug overdose<br>(30.3%)                                           | Malignant<br>neoplasms<br>(11.3%)                                  |
| South Carolina | 7,274<br>(6,907,<br>7,638)    | 0.65 (0.62,<br>0.68) | Drug overdose<br>(18.1%)                             | COVID-19<br>(14.6%)                                                | 39,654<br>(36,661,<br>42,890)    | 3.55 (3.28,<br>3.84) | Drug overdose<br>(14.8%)                                           | Unintentional<br>injuries<br>excluding drug<br>overdose<br>(14.7%) |
| South Dakota   | 1,093 (794,<br>1,510)         | 0.50 (0.36,<br>0.69) | Chronic liver<br>disease and<br>cirrhosis<br>(17.7%) | Unintentional<br>injuries<br>excluding drug<br>overdose<br>(11.7%) | 5,552<br>(3,631,<br>9,040)       | 2.52 (1.65,<br>4.10) | Unintentional<br>injuries<br>excluding drug<br>overdose<br>(19.5%) | Suicide<br>excluding drug<br>overdose<br>(8.6%)                    |
| Tennessee      | 11,908<br>(11,590,<br>12,260) | 0.77 (0.75,<br>0.80) | Drug overdose<br>(23.3%)                             | COVID-19<br>(13.5%)                                                | 63,260<br>(60,342,<br>66,515)    | 4.11 (3.92,<br>4.32) | Drug overdose<br>(18.8%)                                           | Diseases of<br>heart<br>(14.5%)                                    |
| Texas          | 40,272<br>(40,738,<br>39,926) | 0.54 (0.54,<br>0.53) | COVID-19<br>(23.2%)                                  | Diseases of<br>heart<br>(12.0%)                                    | 224,453<br>(226,165,<br>223,024) | 3.00 (3.03,<br>2.98) | Malignant<br>neoplasms<br>(13.9%)                                  | Diseases of<br>heart<br>(13.7%)                                    |

|               |                             |                      |                          |                                                                    |                               |                      |                          |                                                                    |
|---------------|-----------------------------|----------------------|--------------------------|--------------------------------------------------------------------|-------------------------------|----------------------|--------------------------|--------------------------------------------------------------------|
| Utah          | 3,772<br>(3,283,<br>4,293)  | 0.40 (0.35,<br>0.45) | Drug overdose<br>(14.5%) | COVID-19<br>(14.2%)                                                | 24,529<br>(20,856,<br>29,053) | 2.59 (2.20,<br>3.07) | Drug overdose<br>(19.9%) | Suicide<br>excluding drug<br>overdose<br>(15.6%)                   |
| Vermont       | 479 (308,<br>678)           | 0.41 (0.26,<br>0.58) | Drug overdose<br>(32.8%) | Unintentional<br>injuries<br>excluding drug<br>overdose<br>(10.4%) | 2,394<br>(1,244,<br>4,255)    | 2.05 (1.06,<br>3.64) | Drug overdose<br>(21.0%) | Unintentional<br>injuries<br>excluding drug<br>overdose<br>(11.3%) |
| Virginia      | 9,638<br>(9,245,<br>10,045) | 0.51 (0.49,<br>0.53) | Drug overdose<br>(18.6%) | Diseases of<br>heart<br>(13.9%)                                    | 56,961<br>(53,825,<br>60,501) | 3.02 (2.86,<br>3.21) | Drug overdose<br>(16.2%) | Malignant<br>neoplasms<br>(15.3%)                                  |
| Washington    | 7,386<br>(6,998,<br>7,814)  | 0.44 (0.42,<br>0.47) | Drug overdose<br>(17.8%) | Malignant<br>neoplasms<br>(13.6%)                                  | 42,455<br>(39,491,<br>46,039) | 2.53 (2.36,<br>2.75) | Drug overdose<br>(15.9%) | Malignant<br>neoplasms<br>(15.6%)                                  |
| West Virginia | 3,142<br>(2,754,<br>3,552)  | 0.88 (0.77,<br>0.99) | Drug overdose<br>(35.2%) | COVID-19<br>(10.6%)                                                | 17,888<br>(15,069,<br>21,094) | 4.98 (4.20,<br>5.88) | Drug overdose<br>(32.8%) | Unintentional<br>injuries<br>excluding drug<br>overdose<br>(11.2%) |
| Wisconsin     | 4,913<br>(4,528,<br>5,358)  | 0.39 (0.36,<br>0.42) | Drug overdose<br>(21.6%) | Malignant<br>neoplasms<br>(12.1%)                                  | 29,802<br>(26,821,<br>33,307) | 2.34 (2.10,<br>2.61) | Drug overdose<br>(19.9%) | Malignant<br>neoplasms<br>(14.7%)                                  |



|         |                |                   |                                                        |                                         |                      |                   |                                                        |                                         |
|---------|----------------|-------------------|--------------------------------------------------------|-----------------------------------------|----------------------|-------------------|--------------------------------------------------------|-----------------------------------------|
| Wyoming | 542 (348, 880) | 0.41 (0.26, 0.66) | Unintentional injuries excluding drug overdose (13.5%) | Suicide excluding drug overdose (10.3%) | 3,021 (1,734, 5,830) | 2.28 (1.31, 4.40) | Unintentional injuries excluding drug overdose (25.4%) | Suicide excluding drug overdose (11.2%) |
|---------|----------------|-------------------|--------------------------------------------------------|-----------------------------------------|----------------------|-------------------|--------------------------------------------------------|-----------------------------------------|

UI = Uncertainty interval.

**Figure 3.** Spatial distribution of US children experiencing orphanhood in 2021. **(A)** Estimated number of U.S. children newly experiencing parental death as the sum of orphanhood, by state and cause. **(B)** Estimated number of U.S. children experiencing parental death in their lifetime (over the past 18 years), by state and cause. Throughout (A) and (B), the leading cause of orphanhood in each state is indicated with hatch marks. **(C)** Map of orphanhood incidence rates per 100 children, by state and leading cause. **(D)** Map of orphanhood prevalence rate per 100 children, by state and leading cause.

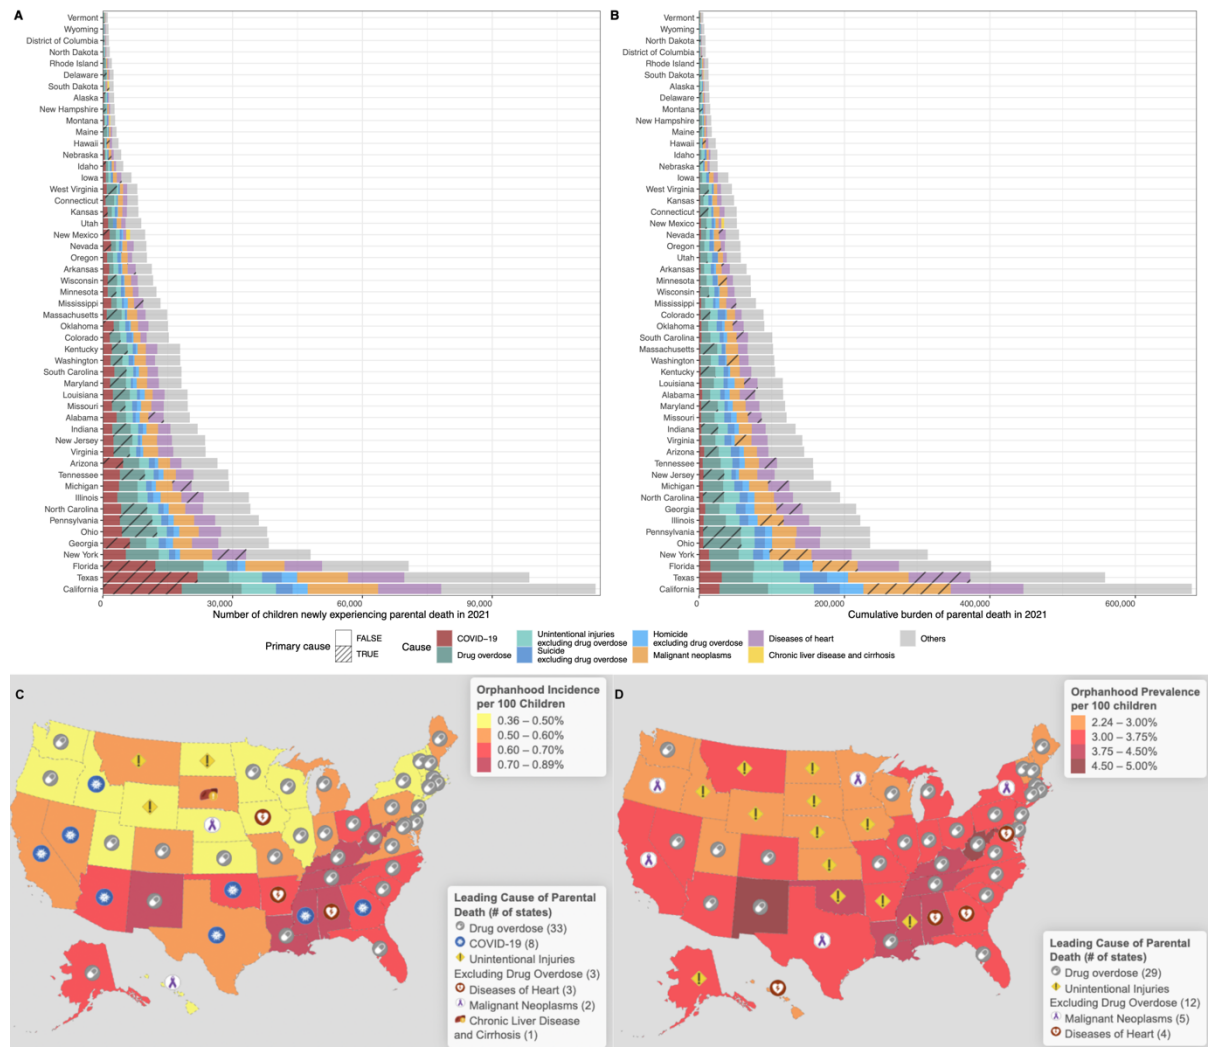



1 Orphanhood and caregiver death among children in the United  
2 States due to all-cause mortality 2000-2021: A Modeling Study

3 Supplementary Materials

4 Andrés Villaveces\*, Yu Chen\*, Sydney Tucker, Alexandra Blenkinsop Lucie Cluver,  
Lorraine Sherr, Linden Graves, Victor Kojey-Merle, Douhan Wang, Greta Massetti, Jan  
Losby, Francis Annor, Leandris Liburd, Rita Noonan, Charles A. Nelson, Seth Flaxman, H  
Juliette T Unwin, Susan Hillis§, Oliver Ratmann§

5 Contents

6 **S0 Supplementary Figures and Tables** 2

7 **S1 Extended methods** 14

8 S1.1 National-level NCHS mortality data by rankable causes of death, 1983-2021 . . . . . 14

9 S1.2 National-level live births data, 1969-2021 . . . . . 23

10 S1.3 National-level population size data, 1990-2021 . . . . . 26

11 S1.4 Estimates of national-level fertility rates, 1990-2021 . . . . . 27

12 S1.5 Estimates of national-level orphanhood, 1983-2021 . . . . . 30

13 S1.6 Estimates of national-level grandparent caregiver loss, 1983-2021 . . . . . 32

14 S1.7 Uncertainty quantification in national estimates . . . . . 34

15 S1.8 Estimates of state-level orphanhood, 2021 . . . . . 35

16 S1.9 Uncertainty quantification in state-level estimates . . . . . 40

17 S1.10 Estimates of racial & ethnic groups impacted by leading causes of caregiver loss in U.S. states,  
18 2021 . . . . . 41

19 **S2 Sensitivity analyses** 49

## S0 Supplementary Figures and Tables

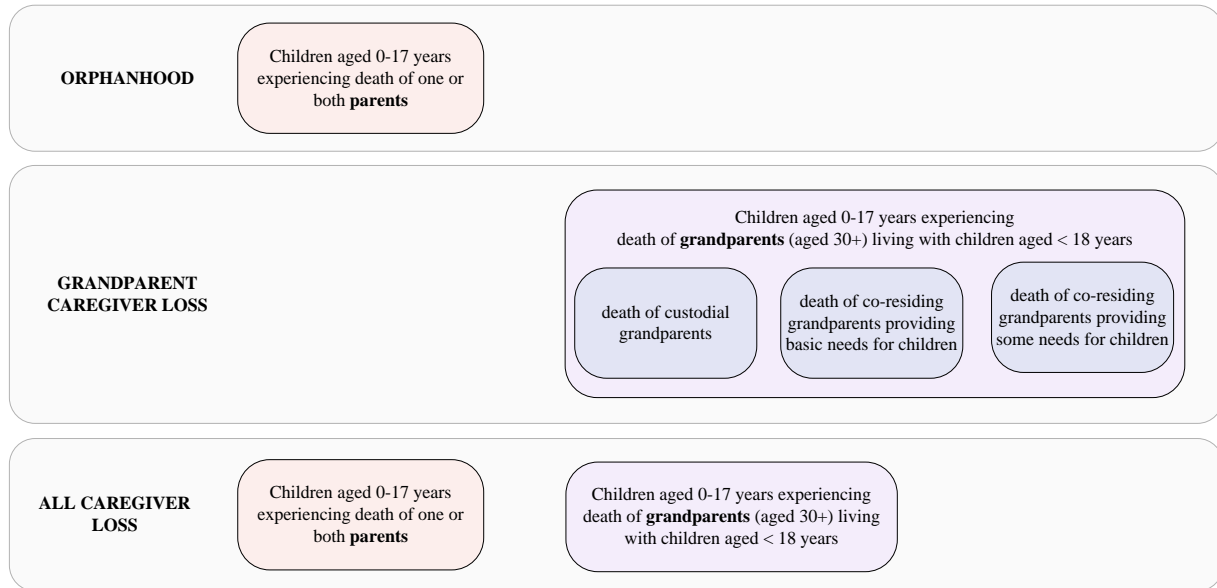

Supplementary Fig. S1: Definitions of orphanhood and grandparent caregiver loss used in this study (orange and purple), with comparison to definitions in previous studies [Hillis et al. 2021a](#) (blue).

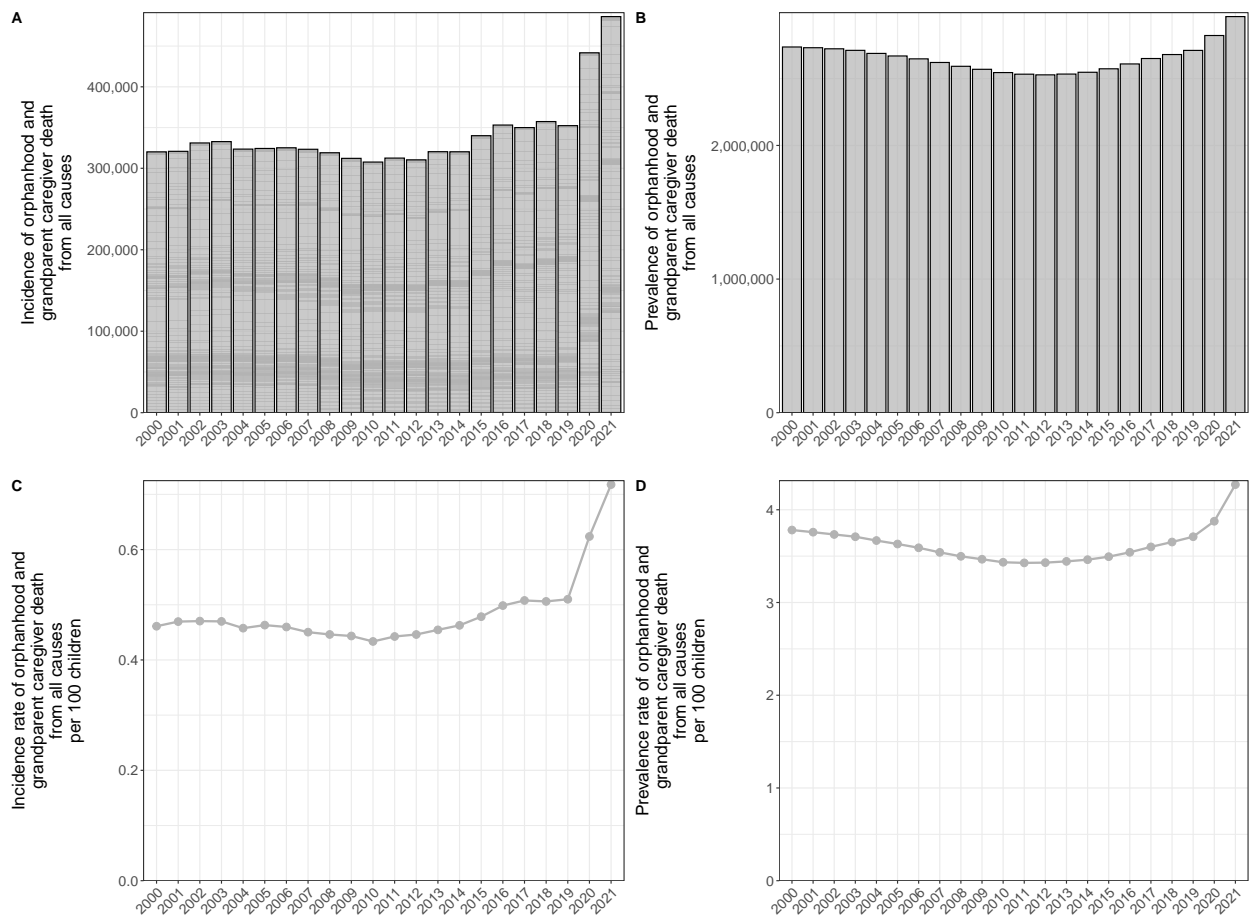

Supplementary Fig. S2: Magnitude of children experiencing the death of a caregiver in the U.S. (A) Estimated number of U.S. children newly experiencing caregiver death as the sum of orphanhood and grandparent caregiver death from all causes (incidence). (B) Estimated number of U.S. children experiencing caregiver death from all causes in their lifetime (prevalence). (C) Incidence rates of caregiver death from all causes among U.S. children. (D) Prevalence rates of caregiver death from all causes among U.S. children.

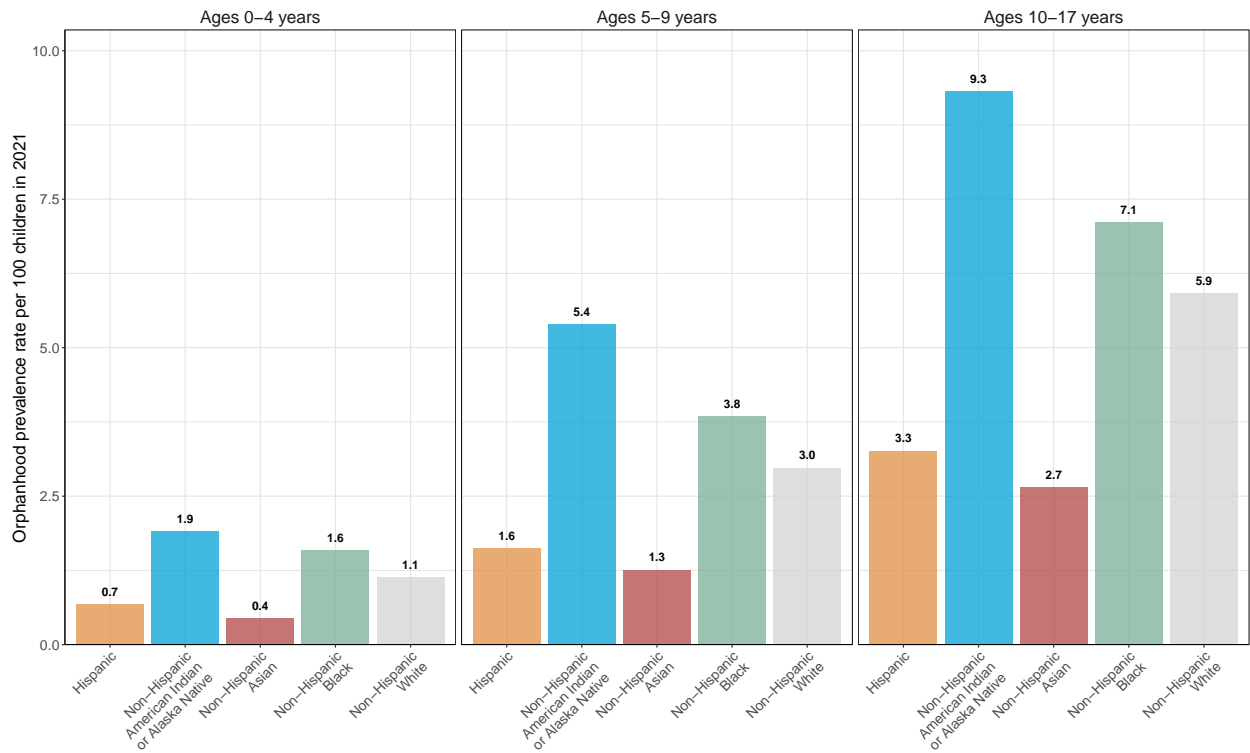

Supplementary Fig. S3: Orphanhood prevalence rates by standardized race & ethnicity in each age group among U.S. children.

| Caregiver loss<br>cause-of-death                                                      | Children newly experiencing<br>orphanhood |        |              | Adult deaths |         |              | Ratio |
|---------------------------------------------------------------------------------------|-------------------------------------------|--------|--------------|--------------|---------|--------------|-------|
|                                                                                       | (rank)                                    | (n)    | (proportion) | (rank)       | (n)     | (proportion) |       |
| Drug overdose                                                                         | #1                                        | 71,112 | 17.5%        | #8           | 105,143 | 3.1%         | 0.68  |
| COVID-19                                                                              | #2                                        | 56,778 | 14.0%        | #3           | 414,781 | 12.1%        | 0.14  |
| Diseases of heart                                                                     | #3                                        | 49,213 | 12.1%        | #1           | 692,150 | 20.2%        | 0.07  |
| Malignant neoplasms                                                                   | #4                                        | 46,145 | 11.4%        | #2           | 601,370 | 17.6%        | 0.08  |
| Unintentional injuries excluding drug overdose                                        | #5                                        | 33,732 | 8.3%         | #6           | 121,610 | 3.6%         | 0.28  |
| Suicide excluding drug overdose                                                       | #6                                        | 20,493 | 5.0%         | #12          | 42,681  | 1.2%         | 0.48  |
| Chronic liver disease and cirrhosis                                                   | #7                                        | 17,311 | 4.3%         | #10          | 56,196  | 1.6%         | 0.31  |
| Homicide excluding drug overdose                                                      | #8                                        | 14,917 | 3.7%         | #17          | 24,548  | 0.7%         | 0.61  |
| Diabetes mellitus                                                                     | #9                                        | 11,182 | 2.8%         | #9           | 102,641 | 3.0%         | 0.11  |
| Cerebrovascular diseases                                                              | #10                                       | 8,171  | 2.0%         | #4           | 161,922 | 4.7%         | 0.05  |
| Chronic lower respiratory diseases                                                    | #11                                       | 4,137  | 1.0%         | #5           | 141,656 | 4.1%         | 0.03  |
| Septicemia                                                                            | #12                                       | 3,663  | 0.9%         | #15          | 40,947  | 1.2%         | 0.09  |
| Nephritis, nephrotic syndrome and nephrosis                                           | #13                                       | 3,619  | 0.9%         | #11          | 54,085  | 1.6%         | 0.07  |
| Influenza and pneumonia                                                               | #14                                       | 2,810  | 0.7%         | #14          | 41,520  | 1.2%         | 0.07  |
| Essential hypertension and<br>hypertensive renal disease                              | #15                                       | 2,514  | 0.6%         | #13          | 42,625  | 1.2%         | 0.06  |
| Human immunodeficiency virus                                                          | #16                                       | 2,178  | 0.5%         | #24          | 4,938   | 0.1%         | 0.44  |
| Pregnancy, childbirth and the puerperium                                              | #17                                       | 2,014  | 0.5%         | #32          | 1,659   | 0.0%         | 1.21  |
| Congenital malformations, deformations<br>and chromosomal abnormalities               | #18                                       | 1,578  | 0.4%         | #25          | 4,905   | 0.1%         | 0.32  |
| Aortic aneurysm and dissection                                                        | #19                                       | 1,107  | 0.3%         | #21          | 9,962   | 0.3%         | 0.11  |
| Pneumonitis due to solids and liquids                                                 | #20                                       | 947    | 0.2%         | #18          | 19,879  | 0.6%         | 0.05  |
| In situ neoplasms, benign neoplasms and<br>neoplasms of uncertain or unknown behavior | #21                                       | 789    | 0.2%         | #20          | 16,067  | 0.5%         | 0.05  |
| Complications of medical and surgical care                                            | #22                                       | 738    | 0.2%         | #22          | 5,971   | 0.2%         | 0.12  |
| Anemias                                                                               | #23                                       | 630    | 0.2%         | #23          | 5,928   | 0.2%         | 0.11  |
| Viral hepatitis                                                                       | #24                                       | 558    | 0.1%         | #30          | 3,557   | 0.1%         | 0.16  |
| Legal intervention                                                                    | #25                                       | 420    | 0.1%         | #35          | 648     | 0.0%         | 0.65  |
| Peptic ulcer                                                                          | #26                                       | 333    | 0.1%         | #29          | 3,972   | 0.1%         | 0.08  |
| Nutritional deficiencies                                                              | #27                                       | 316    | 0.1%         | #19          | 17,433  | 0.5%         | 0.02  |
| Alzheimer disease                                                                     | #28                                       | 184    | 0.0%         | #7           | 119,072 | 3.5%         | 0.00  |
| Parkinson disease                                                                     | #29                                       | 128    | 0.0%         | #16          | 38,446  | 1.1%         | 0.00  |
| Cholelithiasis and other disorders of gallbladder                                     | #30                                       | 123    | 0.0%         | #26          | 4,480   | 0.1%         | 0.03  |
| Enterocolitis due to Clostridium difficile                                            | #31                                       | 119    | 0.0%         | #28          | 4,094   | 0.1%         | 0.03  |
| Infections of kidney                                                                  | #32                                       | 89     | 0.0%         | #33          | 1,232   | 0.0%         | 0.07  |
| Hernia                                                                                | #33                                       | 85     | 0.0%         | #31          | 2,452   | 0.1%         | 0.03  |
| Meningitis                                                                            | #34                                       | 45     | 0.0%         | #38          | 454     | 0.0%         | 0.10  |
| Atherosclerosis                                                                       | #35                                       | 40     | 0.0%         | #27          | 4,185   | 0.1%         | 0.01  |
| Tuberculosis                                                                          | #36                                       | 24     | 0.0%         | #36          | 595     | 0.0%         | 0.04  |
| Inflammatory diseases of female pelvic organs                                         | #37                                       | 21     | 0.0%         | #40          | 211     | 0.0%         | 0.10  |
| Acute bronchitis and bronchiolitis                                                    | #38                                       | 0      | 0.0%         | #41          | 84      | 0.0%         | 0.00  |
| Arthropod-borne viral encephalitis                                                    | #39                                       | 0      | 0.0%         | #47          | 6       | 0.0%         | 0.00  |
| Certain conditions originating in the<br>perinatal period                             | #40                                       | 0      | 0.0%         | #43          | 40      | 0.0%         | 0.00  |
| Diseases of appendix                                                                  | #41                                       | 0      | 0.0%         | #39          | 427     | 0.0%         | 0.00  |
| Hyperplasia of prostate                                                               | #42                                       | 0      | 0.0%         | #34          | 708     | 0.0%         | 0.00  |
| Malaria                                                                               | #43                                       | 0      | 0.0%         | #48          | 6       | 0.0%         | 0.00  |
| Meningococcal infection                                                               | #44                                       | 0      | 0.0%         | #45          | 18      | 0.0%         | 0.00  |
| Operations of war and their sequelae                                                  | #45                                       | 0      | 0.0%         | #46          | 9       | 0.0%         | 0.00  |
| Pneumoconioses and chemical effects                                                   | #46                                       | 0      | 0.0%         | #37          | 562     | 0.0%         | 0.00  |
| Salmonella infections                                                                 | #47                                       | 0      | 0.0%         | #42          | 58      | 0.0%         | 0.00  |
| Shigellosis and amebiasis                                                             | #48                                       | 0      | 0.0%         | #49          | 6       | 0.0%         | 0.00  |
| Syphilis                                                                              | #49                                       | 0      | 0.0%         | #44          | 38      | 0.0%         | 0.00  |
| Whooping cough                                                                        | #50                                       | 0      | 0.0%         | #50          | 2       | 0.0%         | 0.00  |
| Acute poliomyelitis                                                                   | #51                                       | 0      | 0.0%         | #51          | 0       | 0.0%         | 0.00  |
| Measles                                                                               | #52                                       | 0      | 0.0%         | #52          | 0       | 0.0%         | 0.00  |
| Scarlet fever and erysipelas                                                          | #53                                       | 0      | 0.0%         | #53          | 0       | 0.0%         | 0.00  |
| Others                                                                                | -                                         | 48,297 | 11.9%        | -            | 502,198 | 14.7%        | 0.10  |

Supplementary Table S1: Children newly experiencing orphanhood in the U.S. in 2021, by all caregiver loss causes-of-death.



|                                                                            | Before the COVID-19 pandemic     |                                  |                         | Since the COVID-19 pandemic      |                                  |                         |                         |  |
|----------------------------------------------------------------------------|----------------------------------|----------------------------------|-------------------------|----------------------------------|----------------------------------|-------------------------|-------------------------|--|
|                                                                            | 2000<br>(Number<br>of Children)  | 2019<br>(Number<br>of Children)  | 2000-2019<br>changes    | 2020<br>(Number<br>of Children)  | 2021<br>(Number<br>of Children)  | 2019-2021<br>changes    | 2000-2021<br>changes    |  |
| <b>Incidence (n, (95% uncertainty interval))</b>                           |                                  |                                  |                         |                                  |                                  |                         |                         |  |
| <b>Total</b>                                                               | 261,633 (260,485, 262,656)       | 291,574 (290,613, 292,657)       | +11.4% (+10.9%, +12.1%) | 359,431 (358,301, 360,531)       | 406,733 (405,437, 407,928)       | +39.5% (+38.8%, +40.1%) | +55.5% (+54.7%, +56.3%) |  |
| <b>Ages 0-4 years</b>                                                      | 45,358 (45,113, 45,599)          | 53,918 (53,680, 54,175)          | +18.9% (+18.1%, +19.7%) | 65,918 (65,635, 66,198)          | 72,959 (72,651, 73,234)          | +35.3% (+34.4%, +36.1%) | +60.8% (+59.7%, +61.9%) |  |
| <b>Ages 5-9 years</b>                                                      | 61,796 (61,486, 62,066)          | 69,679 (69,397, 69,995)          | +12.7% (+12.1%, +13.5%) | 86,920 (86,582, 87,246)          | 99,593 (99,216, 99,936)          | +42.9% (+42.1%, +43.7%) | +61.2% (+60.2%, +62.2%) |  |
| <b>Ages 10-17 years</b>                                                    | 154,472 (153,795, 155,099)       | 167,971 (167,422, 168,586)       | +8.8% (+8.2%, +9.3%)    | 206,600 (205,961, 207,184)       | 234,176 (233,491, 234,861)       | +39.4% (+38.8%, +40.0%) | +51.6% (+50.8%, +52.4%) |  |
| <b>Incidence rate per 100 children (rate, (95% uncertainty interval))</b>  |                                  |                                  |                         |                                  |                                  |                         |                         |  |
| <b>Total</b>                                                               | 0.36 (0.36, 0.36)                | 0.40 (0.40, 0.40)                | +10.2% (+9.9%, +11.1%)  | 0.49 (0.49, 0.50)                | 0.59 (0.58, 0.59)                | +46.9% (+46.2%, +47.6%) | +62.2% (+61.3%, +63.1%) |  |
| <b>Ages 0-4 years</b>                                                      | 0.24 (0.23, 0.24)                | 0.28 (0.27, 0.28)                | +16.5% (+15.5%, +17.4%) | 0.34 (0.34, 0.34)                | 0.39 (0.39, 0.39)                | +41.8% (+40.8%, +42.7%) | +65.3% (+63.9%, +66.4%) |  |
| <b>Ages 5-9 years</b>                                                      | 0.30 (0.30, 0.30)                | 0.34 (0.34, 0.35)                | +14.2% (+13.5%, +15.0%) | 0.43 (0.43, 0.43)                | 0.50 (0.50, 0.50)                | +44.1% (+43.2%, +44.9%) | +64.6% (+63.4%, +65.4%) |  |
| <b>Ages 10-17 years</b>                                                    | 0.47 (0.47, 0.47)                | 0.50 (0.50, 0.51)                | +7.0% (+6.3%, +7.4%)    | 0.62 (0.62, 0.62)                | 0.69 (0.69, 0.69)                | +36.2% (+35.6%, +36.8%) | +45.6% (+44.8%, +46.4%) |  |
| <b>Incidence rate ratio (ratio relative to children aged 0-4; 95% UI)</b>  |                                  |                                  |                         |                                  |                                  |                         |                         |  |
| <b>Ages 0-4 years</b>                                                      | 1.00 (1.00, 1.00)                | 1.00 (1.00, 1.00)                | -                       | 1.00 (1.00, 1.00)                | 1.00 (1.00, 1.00)                | -                       | -                       |  |
| <b>Ages 5-9 years</b>                                                      | 1.28 (1.27, 1.28)                | 1.25 (1.25, 1.25)                | -                       | 1.26 (1.25, 1.26)                | 1.27 (1.27, 1.27)                | -                       | -                       |  |
| <b>Ages 10-17 years</b>                                                    | 2.00 (1.98, 2.00)                | 1.83 (1.82, 1.84)                | -                       | 1.82 (1.81, 1.82)                | 1.76 (1.75, 1.76)                | -                       | -                       |  |
| <b>Prevalence (n, (95 uncertainty interval))</b>                           |                                  |                                  |                         |                                  |                                  |                         |                         |  |
| <b>Total</b>                                                               | 2,228,940 (2,225,912, 2,232,100) | 2,174,707 (2,172,340, 2,177,566) | -2.4 (-2.6, -2.3)       | 2,266,808 (2,264,259, 2,269,533) | 2,394,604 (2,391,948, 2,397,308) | +10.1% (+10.0%, +10.2%) | +7.4% (+7.2%, +7.6%)    |  |
| <b>Ages 0-4 years</b>                                                      | 132,067 (131,696, 132,425)       | 157,038 (156,635, 157,424)       | +18.9% (+18.5%, +19.3%) | 168,921 (168,531, 169,346)       | 183,938 (183,501, 184,317)       | +17.1% (+16.8%, +17.4%) | +39.3% (+38.8%, +39.8%) |  |
| <b>Ages 5-9 years</b>                                                      | 445,756 (444,996, 446,483)       | 438,521 (437,736, 439,251)       | -1.6 (-1.9, -1.4)       | 466,519 (465,743, 467,308)       | 505,995 (505,178, 506,809)       | +15.4% (+15.2%, +15.5%) | +13.5% (+13.2%, +13.8%) |  |
| <b>Ages 10-17 years</b>                                                    | 1,651,104 (1,648,682, 1,653,655) | 1,579,215 (1,577,538, 1,581,056) | -4.4 (-4.5, -4.2)       | 1,631,393 (1,629,642, 1,633,263) | 1,704,671 (1,702,874, 1,706,564) | +7.9% (+7.9%, +8.0%)    | +3.2% (+3.1%, +3.4%)    |  |
| <b>Prevalence rate per 100 children (rate, (95% uncertainty interval))</b> |                                  |                                  |                         |                                  |                                  |                         |                         |  |
| <b>Total</b>                                                               | 3.08 (3.08, 3.08)                | 2.98 (2.97, 2.98)                | -3.4 (-3.6, -3.2)       | 3.11 (3.11, 3.12)                | 3.45 (3.45, 3.46)                | +16.0% (+15.9%, +16.1%) | +12.0% (+11.8%, +12.3%) |  |
| <b>Ages 0-4 years</b>                                                      | 0.69 (0.69, 0.69)                | 0.80 (0.80, 0.80)                | +16.5% (+16.1%, +16.9%) | 0.88 (0.87, 0.88)                | 0.98 (0.98, 0.99)                | +22.8% (+22.4%, +23.1%) | +43.0% (+42.5%, +43.5%) |  |
| <b>Ages 5-9 years</b>                                                      | 2.18 (2.17, 2.18)                | 2.17 (2.16, 2.17)                | -0.5 (-0.7, -0.2)       | 2.31 (2.30, 2.31)                | 2.52 (2.52, 2.53)                | +16.3% (+16.2%, +16.5%) | +15.8% (+15.5%, +16.1%) |  |
| <b>Ages 10-17 years</b>                                                    | 5.04 (5.04, 5.05)                | 4.74 (4.74, 4.75)                | -6.0 (-6.1, -5.8)       | 4.90 (4.90, 4.91)                | 5.00 (5.00, 5.01)                | +5.5% (+5.4%, +5.5%)    | -0.8 (-1.0, -0.6)       |  |
| <b>Prevalence rate ratio (ratio relative to children aged 0-4; 95% UI)</b> |                                  |                                  |                         |                                  |                                  |                         |                         |  |
| <b>Ages 0-4 years</b>                                                      | 1.00 (1.00, 1.00)                | 1.00 (1.00, 1.00)                | -                       | 1.00 (1.00, 1.00)                | 1.00 (1.00, 1.00)                | -                       | -                       |  |
| <b>Ages 5-9 years</b>                                                      | 3.16 (3.16, 3.17)                | 2.70 (2.70, 2.71)                | -                       | 2.63 (2.63, 2.64)                | 2.56 (2.56, 2.57)                | -                       | -                       |  |
| <b>Ages 10-17 years</b>                                                    | 7.33 (7.30, 7.35)                | 5.91 (5.90, 5.93)                | -                       | 5.60 (5.59, 5.61)                | 5.08 (5.07, 5.09)                | -                       | -                       |  |

Supplementary Table S2: Age groups of children newly experiencing orphanhood in the U.S. from 2000 to 2021.

|                                                                                      | Before the COVID-19 pandemic     |                                  |                            | Since the COVID-19 pandemic      |                                  |                            |                               |  |
|--------------------------------------------------------------------------------------|----------------------------------|----------------------------------|----------------------------|----------------------------------|----------------------------------|----------------------------|-------------------------------|--|
|                                                                                      | 2000<br>(Number<br>of Children)  | 2019<br>(Number<br>of Children)  | 2000-2019<br>changes       | 2020<br>(Number<br>of Children)  | 2021<br>(Number<br>of Children)  | 2019-2021<br>changes       | 2000-2021<br>changes          |  |
| <b>Incidence (n, (95% uncertainty interval))</b>                                     |                                  |                                  |                            |                                  |                                  |                            |                               |  |
| <b>Total</b>                                                                         | 261,633 (260,485, 262,656)       | 291,574 (290,613, 292,657)       | +11.4% (+10.9%, +12.1%)    | 359,431 (358,301, 360,531)       | 406,733 (405,437, 407,928)       | +39.5% (+38.8%, +40.1%)    | +55.5% (+54.7%, +56.3%)       |  |
| <b>Non-Hispanic American Indian or Alaska Native</b>                                 | 2,529 (2,426, 2,646)             | 4,254 (4,116, 4,407)             | +68.2% (+58.3%, +77.7%)    | 6,228 (6,063, 6,397)             | 6,943 (6,771, 7,114)             | +63.2% (+56.5%, +70.2%)    | +174.7% (+160.7%, +188.4%)    |  |
| <b>Non-Hispanic Asian</b>                                                            | 5,559 (5,394, 5,719)             | 9,147 (8,957, 9,335)             | +64.6% (+58.9%, +70.7%)    | 11,560 (11,354, 11,787)          | 11,873 (11,646, 12,080)          | +29.7% (+26.3%, +33.3%)    | +113.6% (+106.9%, +120.5%)    |  |
| <b>Non-Hispanic Black</b>                                                            | 58,337 (57,868, 58,818)          | 57,488 (57,074, 57,927)          | -1.4 (-2.5, -0.3)          | 75,409 (74,894, 75,952)          | 84,023 (83,464, 84,568)          | +46.2% (+44.7%, +47.6%)    | +44.0% (+42.5%, +45.6%)       |  |
| <b>Hispanic</b>                                                                      | 31,027 (30,666, 31,412)          | 46,680 (46,237, 47,138)          | +50.5% (+48.2%, +53.0%)    | 66,849 (66,320, 67,377)          | 77,977 (77,333, 78,523)          | +67.0% (+64.9%, +69.0%)    | +151.4% (+147.8%, +154.8%)    |  |
| <b>Non-Hispanic White</b>                                                            | 164,168 (163,296, 164,974)       | 173,997 (173,269, 174,787)       | +6.0% (+5.3%, +6.7%)       | 199,394 (198,551, 200,192)       | 225,924 (224,990, 226,794)       | +29.8% (+29.1%, +30.6%)    | +37.6% (+36.7%, +38.4%)       |  |
| <b>Incidence rate per 100 children (rate, (95% uncertainty interval))</b>            |                                  |                                  |                            |                                  |                                  |                            |                               |  |
| <b>Total</b>                                                                         | 0.36 (0.36, 0.36)                | 0.40 (0.40, 0.40)                | +10.2% (+9.9%, +11.1%)     | 0.49 (0.49, 0.50)                | 0.59 (0.58, 0.59)                | +46.9% (+46.2%, +47.6%)    | +62.2% (+61.3%, +63.1%)       |  |
| <b>Non-Hispanic American Indian or Alaska Native</b>                                 | 0.32 (0.31, 0.34)                | 0.60 (0.58, 0.62)                | +85.2% (+74.4%, +95.6%)    | 0.88 (0.86, 0.91)                | 1.21 (1.18, 1.24)                | +101.5% (+93.2%, +110.0%)  | +273.4% (+254.1%, +292.2%)    |  |
| <b>Non-Hispanic Asian</b>                                                            | 0.19 (0.19, 0.20)                | 0.20 (0.20, 0.20)                | +4.6% (+1.0%, +8.5%)       | 0.25 (0.25, 0.26)                | 0.29 (0.28, 0.29)                | +42.5% (+38.9%, +46.5%)    | +49.0% (+44.5%, +54.0%)       |  |
| <b>Non-Hispanic Black</b>                                                            | 0.52 (0.52, 0.52)                | 0.52 (0.51, 0.52)                | -0.8 (-1.9, +0.4)          | 0.68 (0.67, 0.68)                | 0.83 (0.83, 0.84)                | +61.6% (+59.9%, +63.2%)    | +60.3% (+58.6%, +62.1%)       |  |
| <b>Hispanic</b>                                                                      | 0.25 (0.25, 0.25)                | 0.25 (0.25, 0.25)                | +0.8% (-0.8, +2.4)         | 0.36 (0.36, 0.36)                | 0.42 (0.41, 0.42)                | +65.6% (+63.5%, +67.6%)    | +66.9% (+64.5%, +69.2%)       |  |
| <b>Non-Hispanic White</b>                                                            | 0.36 (0.36, 0.37)                | 0.46 (0.46, 0.46)                | +25.3% (+24.4%, +26.2%)    | 0.53 (0.53, 0.53)                | 0.63 (0.63, 0.63)                | +37.9% (+37.1%, +38.7%)    | +72.9% (+71.6%, +73.9%)       |  |
| <b>Incidence rate ratio (ratio relative to Non-Hispanic White children; 95% UI)</b>  |                                  |                                  |                            |                                  |                                  |                            |                               |  |
| <b>Non-Hispanic American Indian or Alaska Native</b>                                 | 1.68 (1.60, 1.78)                | 2.98 (2.86, 3.10)                | -                          | 3.50 (3.40, 3.63)                | 4.21 (4.08, 4.35)                | -                          | -                             |  |
| <b>Non-Hispanic Asian</b>                                                            | 1.00 (1.00, 1.00)                | 1.00 (1.00, 1.00)                | -                          | 1.00 (1.00, 1.00)                | 1.00 (1.00, 1.00)                | -                          | -                             |  |
| <b>Non-Hispanic Black</b>                                                            | 2.70 (2.62, 2.79)                | 2.57 (2.52, 2.63)                | -                          | 2.69 (2.63, 2.74)                | 2.91 (2.86, 2.97)                | -                          | -                             |  |
| <b>Hispanic</b>                                                                      | 1.50 (1.26, 1.34)                | 1.25 (1.22, 1.28)                | -                          | 1.42 (1.39, 1.45)                | 1.45 (1.42, 1.48)                | -                          | -                             |  |
| <b>Non-Hispanic White</b>                                                            | 1.90 (1.84, 1.96)                | 2.27 (2.22, 2.32)                | -                          | 2.09 (2.05, 2.13)                | 2.20 (2.16, 2.24)                | -                          | -                             |  |
| <b>Prevalence (n, (95% uncertainty interval))</b>                                    |                                  |                                  |                            |                                  |                                  |                            |                               |  |
| <b>Total</b>                                                                         | 2,228,940 (2,225,912, 2,232,100) | 2,174,707 (2,172,340, 2,177,566) | -2.4 (-2.6, -2.3)          | 2,266,808 (2,264,259, 2,269,533) | 2,394,604 (2,391,948, 2,397,308) | +10.1% (+10.0%, +10.2%)    | +7.4% (+7.2%, +7.6%)          |  |
| <b>Non-Hispanic American Indian or Alaska Native</b>                                 | 20,891 (20,547, 21,233)          | 31,280 (30,928, 31,614)          | +49.8% (+46.8%, +52.7%)    | 34,169 (33,793, 34,524)          | 37,545 (37,150, 37,936)          | +20.1% (+19.1%, +21.0%)    | +79.7% (+76.3%, +83.2%)       |  |
| <b>Non-Hispanic Asian</b>                                                            | 39,880 (39,460, 40,334)          | 61,105 (60,619, 61,555)          | +53.2% (+51.2%, +55.4%)    | 65,307 (64,808, 65,744)          | 69,235 (68,753, 69,717)          | +13.3% (+12.8%, +13.8%)    | +73.6% (+71.3%, +76.0%)       |  |
| <b>Non-Hispanic Black</b>                                                            | 537,243 (535,666, 538,833)       | 424,647 (423,574, 425,780)       | -21.0 (-21.3, -20.6)       | 449,171 (448,091, 450,349)       | 480,610 (479,510, 481,790)       | +13.2% (+13.0%, +13.4%)    | -10.6 (-10.9, -10.2)          |  |
| <b>Hispanic</b>                                                                      | 270,638 (269,515, 271,850)       | 338,784 (337,712, 339,877)       | +25.2% (+24.5%, +25.8%)    | 366,635 (365,440, 367,796)       | 402,161 (400,924, 403,344)       | +18.7% (+18.4%, +19.0%)    | +48.6% (+47.8%, +49.4%)       |  |
| <b>Non-Hispanic White</b>                                                            | 1,360,301 (1,357,973, 1,362,583) | 1,318,925 (1,317,104, 1,320,941) | -3.0 (-3.2, -2.8)          | 1,351,530 (1,349,757, 1,353,610) | 1,405,015 (1,403,095, 1,406,966) | +6.5% (+6.4%, +6.6%)       | +3.3% (+3.1%, +3.5%)          |  |
| <b>Prevalence rate per 100 children (rate, (95% uncertainty interval))</b>           |                                  |                                  |                            |                                  |                                  |                            |                               |  |
| <b>Total</b>                                                                         | 3.08 (3.08, 3.08)                | 2.98 (2.97, 2.98)                | -3.38 (-3.57, -3.22)       | 3.11 (3.11, 3.12)                | 3.45 (3.45, 3.46)                | +15.97% (+15.88%, +16.07%) | +12.05% (+11.84%, +12.26%)    |  |
| <b>Non-Hispanic American Indian or Alaska Native</b>                                 | 2.67 (2.63, 2.71)                | 4.40 (4.35, 4.45)                | +64.89% (+61.59%, +68.16%) | 4.85 (4.80, 4.90)                | 6.52 (6.45, 6.59)                | +48.22% (+47.09%, +49.39%) | +144.29% (+139.61%, +148.99%) |  |
| <b>Non-Hispanic Asian</b>                                                            | 1.38 (1.36, 1.40)                | 1.34 (1.33, 1.35)                | -2.62 (-3.95, -1.25)       | 1.43 (1.41, 1.43)                | 1.67 (1.66, 1.68)                | +24.46% (+23.88%, +25.02%) | +21.20% (+19.55%, +22.81%)    |  |
| <b>Non-Hispanic Black</b>                                                            | 4.79 (4.78, 4.81)                | 3.82 (3.81, 3.83)                | -20.41 (-20.70, -20.08)    | 4.04 (4.03, 4.05)                | 4.77 (4.76, 4.78)                | +25.10% (+24.89%, +25.32%) | -0.42 (-0.81, -0.02)          |  |
| <b>Hispanic</b>                                                                      | 2.17 (2.16, 2.18)                | 1.82 (1.82, 1.83)                | -16.17 (-16.62, -15.73)    | 1.97 (1.96, 1.97)                | 2.15 (2.14, 2.15)                | +17.72% (+17.47%, +17.97%) | -1.33 (-1.88, -0.79)          |  |
| <b>Non-Hispanic White</b>                                                            | 3.02 (3.02, 3.02)                | 3.46 (3.46, 3.47)                | +14.61% (+14.36%, +14.88%) | 3.58 (3.57, 3.58)                | 3.92 (3.91, 3.92)                | +13.20% (+13.09%, +13.30%) | +29.74% (+29.44%, +30.02%)    |  |
| <b>Prevalence rate ratio (ratio relative to Non-Hispanic White children; 95% UI)</b> |                                  |                                  |                            |                                  |                                  |                            |                               |  |
| <b>Non-Hispanic American Indian or Alaska Native</b>                                 | 1.93 (1.90, 1.97)                | 3.28 (3.23, 3.32)                | -                          | 3.41 (3.36, 3.45)                | 3.90 (3.85, 3.95)                | -                          | -                             |  |
| <b>Non-Hispanic Asian</b>                                                            | 1.00 (1.00, 1.00)                | 1.00 (1.00, 1.00)                | -                          | 1.00 (1.00, 1.00)                | 1.00 (1.00, 1.00)                | -                          | -                             |  |
| <b>Non-Hispanic Black</b>                                                            | 3.47 (3.43, 3.51)                | 2.84 (2.82, 2.86)                | -                          | 2.83 (2.81, 2.86)                | 2.86 (2.83, 2.88)                | -                          | -                             |  |
| <b>Hispanic</b>                                                                      | 1.58 (1.56, 1.59)                | 1.36 (1.35, 1.37)                | -                          | 1.38 (1.37, 1.39)                | 1.28 (1.27, 1.29)                | -                          | -                             |  |
| <b>Non-Hispanic White</b>                                                            | 2.19 (2.16, 2.21)                | 2.58 (2.56, 2.60)                | -                          | 2.51 (2.49, 2.53)                | 2.34 (2.33, 2.36)                | -                          | -                             |  |

Supplementary Table S3: Racial and ethnic disparities in children newly experiencing orphanhood in the U.S. from 2000 to 2021.

| U.S. state           | Orphanhood Incidence    |                                            | Grandparent Caregiver Loss Incidence |                                            | All Caregiver Loss Incidence |                                            |
|----------------------|-------------------------|--------------------------------------------|--------------------------------------|--------------------------------------------|------------------------------|--------------------------------------------|
|                      | (n, 95% UI)             | rate<br>per 100 children<br>(rate, 95% UI) | (n, 95% UI)                          | rate<br>per 100 children<br>(rate, 95% UI) | (n, 95% UI)                  | rate<br>per 100 children<br>(rate, 95% UI) |
| Alabama              | 7,991 (7,585, 8,397)    | 0.71 (0.68, 0.75)                          | 2,059 (2,020,2,111)                  | 0.18 (0.18,0.19)                           | 10,050 (9,605, 10,508)       | 0.90 (0.86, 0.94)                          |
| Alaska               | 1,122 (795, 1,478)      | 0.63 (0.44, 0.82)                          | 181 (158,211)                        | 0.10 (0.09,0.12)                           | 1,303 (953, 1,689)           | 0.73 (0.53, 0.94)                          |
| Arizona              | 10,898 (10,511, 11,250) | 0.68 (0.65, 0.70)                          | 2,351 (2,312,2,385)                  | 0.15 (0.14,0.15)                           | 13,249 (12,823, 13,635)      | 0.82 (0.79, 0.84)                          |
| Arkansas             | 4,461 (4,053, 4,945)    | 0.63 (0.58, 0.70)                          | 1,201 (1,143,1,244)                  | 0.17 (0.16,0.18)                           | 5,662 (5,196, 6,189)         | 0.80 (0.74, 0.88)                          |
| California           | 45,004 (45,713, 44,534) | 0.51 (0.52, 0.51)                          | 11,943 (12,088,11,783)               | 0.14 (0.14,0.13)                           | 56,947 (57,801, 56,317)      | 0.65 (0.66, 0.64)                          |
| Colorado             | 6,587 (6,178, 6,985)    | 0.53 (0.50, 0.56)                          | 1,039 (1,010,1,079)                  | 0.08 (0.08,0.09)                           | 7,626 (7,188, 8,064)         | 0.61 (0.58, 0.65)                          |
| Connecticut          | 3,330 (2,922, 3,741)    | 0.46 (0.40, 0.51)                          | 730 (697,766)                        | 0.10 (0.10,0.10)                           | 4,060 (3,619, 4,507)         | 0.56 (0.50, 0.62)                          |
| Delaware             | 962 (667, 1,279)        | 0.46 (0.32, 0.61)                          | 274 (234,336)                        | 0.13 (0.11,0.16)                           | 1,236 (901, 1,615)           | 0.59 (0.43, 0.78)                          |
| District of Columbia | 612 (432, 823)          | 0.49 (0.34, 0.65)                          | 90 (70,116)                          | 0.07 (0.06,0.09)                           | 702 (502, 939)               | 0.56 (0.40, 0.75)                          |
| Florida              | 28,456 (28,600, 28,393) | 0.66 (0.67, 0.66)                          | 6,884 (6,929,6,850)                  | 0.16 (0.16,0.16)                           | 35,340 (35,529, 35,243)      | 0.82 (0.83, 0.82)                          |
| Georgia              | 15,723 (15,459, 16,039) | 0.62 (0.61, 0.64)                          | 3,454 (3,451,3,491)                  | 0.14 (0.14,0.14)                           | 19,177 (18,910, 19,530)      | 0.76 (0.75, 0.77)                          |
| Hawaii               | 1,231 (950, 1,580)      | 0.40 (0.31, 0.52)                          | 580 (526,634)                        | 0.19 (0.17,0.21)                           | 1,811 (1,476, 2,214)         | 0.59 (0.48, 0.73)                          |
| Idaho                | 1,940 (1,544, 2,372)    | 0.41 (0.33, 0.51)                          | 419 (371,459)                        | 0.09 (0.08,0.10)                           | 2,359 (1,915, 2,831)         | 0.50 (0.41, 0.60)                          |
| Illinois             | 13,831 (13,528, 14,158) | 0.49 (0.48, 0.51)                          | 3,044 (3,047,3,061)                  | 0.11 (0.11,0.11)                           | 16,875 (16,575, 17,219)      | 0.60 (0.59, 0.61)                          |
| Indiana              | 9,148 (8,705, 9,532)    | 0.58 (0.55, 0.60)                          | 1,813 (1,769,1,861)                  | 0.11 (0.11,0.12)                           | 10,961 (10,474, 11,393)      | 0.69 (0.66, 0.72)                          |
| Iowa                 | 2,784 (2,381, 3,218)    | 0.38 (0.32, 0.44)                          | 525 (481,543)                        | 0.07 (0.07,0.07)                           | 3,309 (2,862, 3,761)         | 0.45 (0.39, 0.51)                          |
| Kansas               | 3,455 (3,041, 3,947)    | 0.49 (0.43, 0.56)                          | 655 (625,700)                        | 0.09 (0.09,0.10)                           | 4,110 (3,666, 4,647)         | 0.58 (0.52, 0.66)                          |
| Kentucky             | 7,183 (6,792, 7,634)    | 0.71 (0.67, 0.75)                          | 1,749 (1,717,1,791)                  | 0.17 (0.17,0.18)                           | 8,932 (8,509, 9,425)         | 0.88 (0.84, 0.93)                          |
| Louisiana            | 8,108 (7,719, 8,511)    | 0.75 (0.71, 0.79)                          | 1,683 (1,643,1,734)                  | 0.16 (0.15,0.16)                           | 9,791 (9,362, 10,245)        | 0.90 (0.86, 0.95)                          |
| Maine                | 1,347 (1,056, 1,679)    | 0.53 (0.42, 0.67)                          | 238 (208,288)                        | 0.09 (0.08,0.11)                           | 1,585 (1,264, 1,967)         | 0.63 (0.50, 0.78)                          |
| Maryland             | 7,419 (6,996, 7,815)    | 0.54 (0.51, 0.57)                          | 1,674 (1,627,1,716)                  | 0.12 (0.12,0.13)                           | 9,093 (8,623, 9,531)         | 0.67 (0.63, 0.70)                          |
| Massachusetts        | 6,038 (5,612, 6,457)    | 0.44 (0.41, 0.47)                          | 1,402 (1,359,1,456)                  | 0.10 (0.10,0.11)                           | 7,440 (6,971, 7,913)         | 0.55 (0.51, 0.58)                          |
| Michigan             | 12,179 (11,820, 12,509) | 0.57 (0.55, 0.58)                          | 2,413 (2,398,2,419)                  | 0.11 (0.11,0.11)                           | 14,592 (14,218, 14,928)      | 0.68 (0.66, 0.69)                          |
| Minnesota            | 5,403 (4,951, 5,883)    | 0.41 (0.38, 0.45)                          | 796 (762,826)                        | 0.06 (0.06,0.06)                           | 6,199 (5,713, 6,709)         | 0.47 (0.43, 0.51)                          |
| Mississippi          | 5,251 (4,791, 5,668)    | 0.76 (0.69, 0.82)                          | 1,411 (1,357,1,474)                  | 0.20 (0.20,0.21)                           | 6,662 (6,148, 7,142)         | 0.96 (0.89, 1.03)                          |
| Missouri             | 8,128 (7,727, 8,525)    | 0.59 (0.56, 0.62)                          | 1,681 (1,646,1,719)                  | 0.12 (0.12,0.12)                           | 9,809 (9,373, 10,244)        | 0.71 (0.68, 0.74)                          |
| Montana              | 1,216 (912, 1,568)      | 0.52 (0.39, 0.67)                          | 205 (174,252)                        | 0.09 (0.07,0.11)                           | 1,421 (1,086, 1,820)         | 0.60 (0.46, 0.77)                          |
| Nebraska             | 1,809 (1,412, 2,261)    | 0.37 (0.29, 0.47)                          | 315 (287,356)                        | 0.07 (0.06,0.07)                           | 2,124 (1,699, 2,617)         | 0.44 (0.35, 0.54)                          |
| Nevada               | 4,034 (3,650, 4,450)    | 0.58 (0.52, 0.64)                          | 997 (962,1,050)                      | 0.14 (0.14,0.15)                           | 5,031 (4,612, 5,500)         | 0.72 (0.66, 0.79)                          |
| New Hampshire        | 1,094 (814, 1,405)      | 0.43 (0.32, 0.55)                          | 263 (225,333)                        | 0.10 (0.09,0.13)                           | 1,357 (1,039, 1,738)         | 0.53 (0.41, 0.68)                          |
| New Jersey           | 9,644 (9,235, 10,114)   | 0.48 (0.46, 0.50)                          | 2,180 (2,150,2,211)                  | 0.11 (0.11,0.11)                           | 11,824 (11,385, 12,325)      | 0.58 (0.56, 0.61)                          |
| New Mexico           | 4,137 (3,701, 4,558)    | 0.87 (0.78, 0.96)                          | 756 (719,812)                        | 0.16 (0.15,0.17)                           | 4,893 (4,420, 5,370)         | 1.03 (0.93, 1.13)                          |
| New York             | 19,199 (19,000, 19,436) | 0.47 (0.46, 0.47)                          | 4,809 (4,858,4,812)                  | 0.12 (0.12,0.12)                           | 24,008 (23,858, 24,248)      | 0.58 (0.58, 0.59)                          |
| North Carolina       | 14,097 (13,786, 14,457) | 0.61 (0.60, 0.63)                          | 2,950 (2,925,2,964)                  | 0.13 (0.13,0.13)                           | 17,047 (16,711, 17,421)      | 0.74 (0.73, 0.76)                          |
| North Dakota         | 695 (469, 1,081)        | 0.37 (0.25, 0.58)                          | 101 (71,126)                         | 0.05 (0.04,0.07)                           | 796 (540, 1,207)             | 0.43 (0.29, 0.65)                          |

Supplementary Table S4: Incidence of orphanhood, grandparent caregiver loss and all caregiver loss in 2021 by U.S. states.

| U.S. state     | Orphanhood Incidence    |                                            | Grandparent Caregiver Loss Incidence |                                            | All Caregiver Loss Incidence |                                            |
|----------------|-------------------------|--------------------------------------------|--------------------------------------|--------------------------------------------|------------------------------|--------------------------------------------|
|                | (n, 95% UI)             | rate<br>per 100 children<br>(rate, 95% UI) | (n, 95% UI)                          | rate<br>per 100 children<br>(rate, 95% UI) | (n, 95% UI)                  | rate<br>per 100 children<br>(rate, 95% UI) |
| Ohio           | 15,767 (15,525, 16,051) | 0.61 (0.60, 0.62)                          | 3,225 (3,202,3,248)                  | 0.12 (0.12,0.12)                           | 18,992 (18,727, 19,299)      | 0.73 (0.72, 0.74)                          |
| Oklahoma       | 6,119 (5,684, 6,576)    | 0.64 (0.59, 0.68)                          | 1,411 (1,377,1,445)                  | 0.15 (0.14,0.15)                           | 7,530 (7,061, 8,021)         | 0.78 (0.73, 0.83)                          |
| Oregon         | 4,153 (3,757, 4,561)    | 0.48 (0.44, 0.53)                          | 940 (904,980)                        | 0.11 (0.10,0.11)                           | 5,093 (4,661, 5,541)         | 0.59 (0.54, 0.64)                          |
| Pennsylvania   | 14,609 (14,349, 14,918) | 0.55 (0.54, 0.56)                          | 3,417 (3,396,3,427)                  | 0.13 (0.13,0.13)                           | 18,026 (17,745, 18,345)      | 0.67 (0.66, 0.69)                          |
| Rhode Island   | 791 (565, 1,048)        | 0.38 (0.27, 0.50)                          | 249 (206,304)                        | 0.12 (0.10,0.15)                           | 1,040 (771, 1,352)           | 0.50 (0.37, 0.65)                          |
| South Carolina | 7,274 (6,907, 7,638)    | 0.65 (0.62, 0.68)                          | 1,817 (1,783,1,854)                  | 0.16 (0.16,0.17)                           | 9,091 (8,690, 9,492)         | 0.81 (0.78, 0.85)                          |
| South Dakota   | 1,093 (794, 1,510)      | 0.50 (0.36, 0.69)                          | 149 (128,182)                        | 0.07 (0.06,0.08)                           | 1,242 (922, 1,692)           | 0.56 (0.42, 0.77)                          |
| Tennessee      | 11,908 (11,590, 12,260) | 0.77 (0.75, 0.80)                          | 2,594 (2,548,2,613)                  | 0.17 (0.17,0.17)                           | 14,502 (14,138, 14,873)      | 0.94 (0.92, 0.97)                          |
| Texas          | 40,272 (40,738, 39,926) | 0.54 (0.54, 0.53)                          | 9,019 (9,138,8,931)                  | 0.12 (0.12,0.12)                           | 49,291 (49,876, 48,857)      | 0.66 (0.67, 0.65)                          |
| Utah           | 3,772 (3,283, 4,293)    | 0.40 (0.35, 0.45)                          | 672 (631,700)                        | 0.07 (0.07,0.07)                           | 4,444 (3,914, 4,993)         | 0.47 (0.41, 0.53)                          |
| Vermont        | 479 (308, 678)          | 0.41 (0.26, 0.58)                          | 91 (77,130)                          | 0.08 (0.07,0.11)                           | 570 (385, 808)               | 0.49 (0.33, 0.69)                          |
| Virginia       | 9,638 (9,245, 10,045)   | 0.51 (0.49, 0.53)                          | 2,238 (2,211,2,277)                  | 0.12 (0.12,0.12)                           | 11,876 (11,456, 12,322)      | 0.63 (0.61, 0.65)                          |
| Washington     | 7,386 (6,998, 7,814)    | 0.44 (0.42, 0.47)                          | 1,566 (1,545,1,604)                  | 0.09 (0.09,0.10)                           | 8,952 (8,543, 9,418)         | 0.53 (0.51, 0.56)                          |
| West Virginia  | 3,142 (2,754, 3,552)    | 0.88 (0.77, 0.99)                          | 841 (791,896)                        | 0.23 (0.22,0.25)                           | 3,983 (3,545, 4,448)         | 1.11 (0.99, 1.24)                          |
| Wisconsin      | 4,913 (4,528, 5,358)    | 0.39 (0.36, 0.42)                          | 899 (873,937)                        | 0.07 (0.07,0.07)                           | 5,812 (5,401, 6,295)         | 0.46 (0.42, 0.49)                          |
| Wyoming        | 542 (348, 880)          | 0.41 (0.26, 0.66)                          | 117 (93,161)                         | 0.09 (0.07,0.12)                           | 659 (441, 1,041)             | 0.50 (0.33, 0.79)                          |

Supplementary Table S4: Incidence of orphanhood, grandparent caregiver loss and all caregiver loss in 2021 by U.S. states (continued).

| U.S. state           | Orphanhood Prevalence      |                                            | Grandparent Caregiver Loss Prevalence |                                            | All Caregiver Loss Prevalence |                                            |
|----------------------|----------------------------|--------------------------------------------|---------------------------------------|--------------------------------------------|-------------------------------|--------------------------------------------|
|                      | (n, 95% UI)                | rate<br>per 100 children<br>(rate, 95% UI) | (n, 95% UI)                           | rate<br>per 100 children<br>(rate, 95% UI) | (n, 95% UI)                   | rate<br>per 100 children<br>(rate, 95% UI) |
| Alabama              | 45,696 (42,504, 49,079)    | 4.07 (3.79, 4.37)                          | 12,161 (11,827,12,494)                | 1.08 (1.05,1.11)                           | 57,857 (54,331, 61,573)       | 5.16 (4.84, 5.49)                          |
| Alaska               | 5,922 (3,970, 9,170)       | 3.30 (2.21, 5.11)                          | 870 (762,1,005)                       | 0.49 (0.42,0.56)                           | 6,792 (4,732, 10,175)         | 3.79 (2.64, 5.67)                          |
| Arizona              | 59,002 (55,837, 62,261)    | 3.66 (3.46, 3.86)                          | 13,278 (13,007,13,569)                | 0.82 (0.81,0.84)                           | 72,280 (68,844, 75,830)       | 4.48 (4.27, 4.70)                          |
| Arkansas             | 25,644 (22,348, 29,481)    | 3.65 (3.18, 4.19)                          | 7,021 (6,743,7,291)                   | 1.00 (0.96,1.04)                           | 32,665 (29,091, 36,772)       | 4.64 (4.14, 5.23)                          |
| California           | 264,622 (268,326, 261,397) | 3.02 (3.06, 2.98)                          | 74,191 (75,068,73,320)                | 0.85 (0.86,0.84)                           | 338,813 (343,394, 334,717)    | 3.86 (3.91, 3.82)                          |
| Colorado             | 37,868 (34,890, 41,412)    | 3.05 (2.81, 3.33)                          | 6,479 (6,241,6,640)                   | 0.52 (0.50,0.53)                           | 44,347 (41,131, 48,052)       | 3.57 (3.31, 3.86)                          |
| Connecticut          | 20,874 (17,911, 24,220)    | 2.86 (2.45, 3.32)                          | 5,003 (4,756,5,250)                   | 0.69 (0.65,0.72)                           | 25,877 (22,667, 29,470)       | 3.55 (3.11, 4.04)                          |
| Delaware             | 5,467 (3,582, 7,985)       | 2.62 (1.72, 3.83)                          | 1,703 (1,488,1,939)                   | 0.82 (0.71,0.93)                           | 7,170 (5,070, 9,924)          | 3.44 (2.43, 4.76)                          |
| District of Columbia | 3,828 (2,465, 5,519)       | 3.04 (1.96, 4.39)                          | 682 (541,838)                         | 0.54 (0.43,0.67)                           | 4,510 (3,006, 6,357)          | 3.58 (2.39, 5.05)                          |
| Florida              | 159,629 (159,761, 159,719) | 3.72 (3.72, 3.72)                          | 41,174 (41,310,40,992)                | 0.96 (0.96,0.96)                           | 200,803 (201,071, 200,711)    | 4.68 (4.69, 4.68)                          |
| Georgia              | 87,557 (84,749, 90,515)    | 3.47 (3.36, 3.59)                          | 20,486 (20,249,20,730)                | 0.81 (0.80,0.82)                           | 108,043 (104,998, 111,245)    | 4.28 (4.16, 4.41)                          |
| Hawaii               | 7,692 (5,510, 10,706)      | 2.53 (1.81, 3.52)                          | 3,773 (3,449,4,067)                   | 1.24 (1.13,1.34)                           | 11,465 (8,959, 14,773)        | 3.77 (2.94, 4.85)                          |
| Idaho                | 10,474 (7,785, 14,079)     | 2.23 (1.66, 3.00)                          | 2,115 (1,892,2,316)                   | 0.45 (0.40,0.49)                           | 12,589 (9,677, 16,395)        | 2.68 (2.06, 3.50)                          |
| Illinois             | 89,775 (87,129, 92,407)    | 3.20 (3.11, 3.30)                          | 21,093 (20,885,21,252)                | 0.75 (0.75,0.76)                           | 110,868 (108,014, 113,659)    | 3.96 (3.85, 4.05)                          |
| Indiana              | 54,889 (51,659, 58,427)    | 3.46 (3.26, 3.68)                          | 11,457 (11,236,11,707)                | 0.72 (0.71,0.74)                           | 66,346 (62,895, 70,134)       | 4.18 (3.96, 4.42)                          |
| Iowa                 | 16,673 (13,710, 20,323)    | 2.26 (1.86, 2.76)                          | 3,477 (3,255,3,646)                   | 0.47 (0.44,0.50)                           | 20,150 (16,965, 23,969)       | 2.74 (2.30, 3.25)                          |
| Kansas               | 19,915 (16,740, 23,836)    | 2.83 (2.38, 3.39)                          | 4,152 (3,937,4,336)                   | 0.59 (0.56,0.62)                           | 24,067 (20,677, 28,172)       | 3.42 (2.94, 4.01)                          |
| Kentucky             | 42,002 (38,999, 45,578)    | 4.13 (3.84, 4.49)                          | 10,306 (10,051,10,564)                | 1.01 (0.99,1.04)                           | 52,308 (49,050, 56,142)       | 5.15 (4.83, 5.53)                          |
| Louisiana            | 46,778 (43,522, 50,175)    | 4.32 (4.02, 4.63)                          | 10,795 (10,499,11,134)                | 1.00 (0.97,1.03)                           | 57,573 (54,021, 61,309)       | 5.32 (4.99, 5.66)                          |
| Maine                | 7,245 (5,099, 9,975)       | 2.88 (2.02, 3.96)                          | 1,501 (1,313,1,690)                   | 0.60 (0.52,0.67)                           | 8,746 (6,412, 11,665)         | 3.47 (2.55, 4.63)                          |
| Maryland             | 48,147 (44,993, 51,637)    | 3.53 (3.30, 3.79)                          | 11,033 (10,719,11,302)                | 0.81 (0.79,0.83)                           | 59,180 (55,712, 62,939)       | 4.34 (4.09, 4.62)                          |
| Massachusetts        | 41,234 (38,098, 44,636)    | 3.03 (2.80, 3.28)                          | 9,662 (9,382,9,944)                   | 0.71 (0.69,0.73)                           | 50,896 (47,480, 54,580)       | 3.74 (3.49, 4.01)                          |
| Michigan             | 75,255 (72,209, 78,059)    | 3.49 (3.35, 3.62)                          | 15,510 (15,321,15,665)                | 0.72 (0.71,0.73)                           | 90,765 (87,530, 93,724)       | 4.22 (4.06, 4.35)                          |
| Minnesota            | 30,442 (27,178, 34,423)    | 2.31 (2.06, 2.61)                          | 5,052 (4,865,5,168)                   | 0.38 (0.37,0.39)                           | 35,494 (32,043, 39,591)       | 2.69 (2.43, 3.00)                          |
| Mississippi          | 30,280 (26,942, 33,913)    | 4.37 (3.89, 4.89)                          | 8,831 (8,447,9,148)                   | 1.27 (1.22,1.32)                           | 39,111 (35,389, 43,061)       | 5.65 (5.11, 6.22)                          |
| Missouri             | 49,665 (46,695, 52,986)    | 3.59 (3.37, 3.83)                          | 10,529 (10,283,10,741)                | 0.76 (0.74,0.78)                           | 60,194 (56,978, 63,727)       | 4.35 (4.12, 4.60)                          |
| Montana              | 6,553 (4,473, 9,605)       | 2.79 (1.90, 4.09)                          | 1,154 (1,012,1,344)                   | 0.49 (0.43,0.57)                           | 7,707 (5,485, 10,949)         | 3.28 (2.33, 4.66)                          |
| Nebraska             | 10,680 (8,043, 14,384)     | 2.21 (1.67, 2.98)                          | 2,096 (1,940,2,287)                   | 0.43 (0.40,0.47)                           | 12,776 (9,983, 16,671)        | 2.65 (2.07, 3.45)                          |
| Nevada               | 21,946 (18,876, 25,409)    | 3.14 (2.70, 3.64)                          | 5,510 (5,241,5,775)                   | 0.79 (0.75,0.83)                           | 27,456 (24,117, 31,184)       | 3.93 (3.45, 4.46)                          |
| New Hampshire        | 6,869 (4,778, 9,552)       | 2.68 (1.86, 3.73)                          | 1,512 (1,328,1,786)                   | 0.59 (0.52,0.70)                           | 8,381 (6,106, 11,338)         | 3.27 (2.38, 4.42)                          |
| New Jersey           | 63,595 (60,303, 67,269)    | 3.14 (2.98, 3.32)                          | 15,171 (14,865,15,428)                | 0.75 (0.73,0.76)                           | 78,766 (75,168, 82,697)       | 3.89 (3.72, 4.09)                          |
| New Mexico           | 21,632 (18,554, 25,154)    | 4.57 (3.92, 5.32)                          | 4,366 (4,039,4,708)                   | 0.92 (0.85,0.99)                           | 25,998 (22,593, 29,862)       | 5.49 (4.77, 6.31)                          |
| New York             | 124,546 (122,607, 126,477) | 3.03 (2.98, 3.07)                          | 32,708 (32,779,32,688)                | 0.80 (0.80,0.79)                           | 157,254 (155,386, 159,165)    | 3.82 (3.78, 3.87)                          |
| North Carolina       | 79,120 (76,394, 82,029)    | 3.44 (3.32, 3.56)                          | 17,835 (17,577,18,053)                | 0.77 (0.76,0.78)                           | 96,955 (93,971, 100,082)      | 4.21 (4.08, 4.35)                          |
| North Dakota         | 3,808 (2,409, 6,887)       | 2.05 (1.30, 3.71)                          | 609 (422,801)                         | 0.33 (0.23,0.43)                           | 4,417 (2,831, 7,688)          | 2.38 (1.52, 4.14)                          |

Supplementary Table S5: Prevalence of orphanhood, grandparent caregiver loss and all caregiver loss in 2021 by U.S. states.

| U.S. state     | Orphanhood Prevalence      |                                            | Grandparent Caregiver Loss Prevalence |                                            | All Caregiver Loss Prevalence |                                            |
|----------------|----------------------------|--------------------------------------------|---------------------------------------|--------------------------------------------|-------------------------------|--------------------------------------------|
|                | (n, 95% UI)                | rate<br>per 100 children<br>(rate, 95% UI) | (n, 95% UI)                           | rate<br>per 100 children<br>(rate, 95% UI) | (n, 95% UI)                   | rate<br>per 100 children<br>(rate, 95% UI) |
| Ohio           | 97,161 (94,914, 99,413)    | 3.73 (3.64, 3.82)                          | 20,475 (20,261,20,618)                | 0.79 (0.78,0.79)                           | 117,636 (115,175, 120,031)    | 4.51 (4.42, 4.61)                          |
| Oklahoma       | 36,240 (32,901, 39,983)    | 3.77 (3.42, 4.16)                          | 8,612 (8,355,8,818)                   | 0.90 (0.87,0.92)                           | 44,852 (41,256, 48,801)       | 4.66 (4.29, 5.08)                          |
| Oregon         | 22,994 (19,901, 26,282)    | 2.67 (2.31, 3.05)                          | 5,459 (5,192,5,663)                   | 0.63 (0.60,0.66)                           | 28,453 (25,093, 31,945)       | 3.30 (2.91, 3.71)                          |
| Pennsylvania   | 95,425 (93,303, 97,704)    | 3.57 (3.49, 3.65)                          | 22,181 (21,981,22,279)                | 0.83 (0.82,0.83)                           | 117,606 (115,284, 119,983)    | 4.40 (4.31, 4.49)                          |
| Rhode Island   | 4,826 (3,084, 7,091)       | 2.31 (1.48, 3.40)                          | 1,567 (1,295,1,874)                   | 0.75 (0.62,0.90)                           | 6,393 (4,379, 8,965)          | 3.06 (2.10, 4.29)                          |
| South Carolina | 39,654 (36,661, 42,890)    | 3.55 (3.28, 3.84)                          | 10,729 (10,470,10,999)                | 0.96 (0.94,0.98)                           | 50,383 (47,131, 53,889)       | 4.51 (4.22, 4.82)                          |
| South Dakota   | 5,552 (3,631, 9,040)       | 2.52 (1.65, 4.10)                          | 957 (793,1,154)                       | 0.43 (0.36,0.52)                           | 6,509 (4,424, 10,194)         | 2.95 (2.01, 4.62)                          |
| Tennessee      | 63,260 (60,342, 66,515)    | 4.11 (3.92, 4.32)                          | 15,134 (14,875,15,388)                | 0.98 (0.97,1.00)                           | 78,394 (75,217, 81,903)       | 5.09 (4.88, 5.32)                          |
| Texas          | 224,453 (226,165, 223,024) | 3.00 (3.03, 2.98)                          | 54,728 (55,197,54,279)                | 0.73 (0.74,0.73)                           | 279,181 (281,362, 277,303)    | 3.73 (3.76, 3.71)                          |
| Utah           | 24,529 (20,856, 29,053)    | 2.59 (2.20, 3.07)                          | 4,187 (3,852,4,393)                   | 0.44 (0.41,0.46)                           | 28,716 (24,708, 33,446)       | 3.03 (2.61, 3.53)                          |
| Vermont        | 2,394 (1,244, 4,255)       | 2.05 (1.06, 3.64)                          | 545 (429,838)                         | 0.47 (0.37,0.72)                           | 2,939 (1,673, 5,093)          | 2.51 (1.43, 4.35)                          |
| Virginia       | 56,961 (53,825, 60,501)    | 3.02 (2.86, 3.21)                          | 14,070 (13,841,14,335)                | 0.75 (0.73,0.76)                           | 71,031 (67,666, 74,836)       | 3.77 (3.59, 3.97)                          |
| Washington     | 42,455 (39,491, 46,039)    | 2.53 (2.36, 2.75)                          | 9,257 (9,043,9,486)                   | 0.55 (0.54,0.57)                           | 51,712 (48,534, 55,525)       | 3.09 (2.90, 3.31)                          |
| West Virginia  | 17,888 (15,069, 21,094)    | 4.98 (4.20, 5.88)                          | 4,713 (4,394,5,029)                   | 1.31 (1.22,1.40)                           | 22,601 (19,463, 26,123)       | 6.29 (5.42, 7.28)                          |
| Wisconsin      | 29,802 (26,821, 33,307)    | 2.34 (2.10, 2.61)                          | 5,885 (5,647,6,052)                   | 0.46 (0.44,0.47)                           | 35,687 (32,468, 39,359)       | 2.80 (2.55, 3.09)                          |
| Wyoming        | 3,021 (1,734, 5,830)       | 2.28 (1.31, 4.40)                          | 605 (472,784)                         | 0.46 (0.36,0.59)                           | 3,626 (2,206, 6,614)          | 2.74 (1.67, 4.99)                          |

Supplementary Table S5: Prevalence of orphanhood, grandparent caregiver loss and all caregiver loss in 2021 by U.S. states (continued).

| Rank* | U.S. state    | Leading caregiver loss cause-of-death          | Standardized race & ethnicity                 | Population size** | Deaths*** | Exclusion criteria                     | Orphanhood prevalence rate per 100 children† |
|-------|---------------|------------------------------------------------|-----------------------------------------------|-------------------|-----------|----------------------------------------|----------------------------------------------|
| 1     | West Virginia | Drug overdose                                  | Hispanic                                      | 16,747            | 3         | small populations & small death counts | -                                            |
|       |               |                                                | Non-Hispanic American Indian or Alaska Native | 3,265             | 0         | small populations & small death counts | -                                            |
|       |               |                                                | Non-Hispanic Asian                            | 11,802            | 0         | small populations & small death counts | -                                            |
|       |               |                                                | Non-Hispanic Black                            | 52,936            | 13        | small death counts                     | -                                            |
|       |               |                                                | Non-Hispanic White                            | 1,425,205         | 569       |                                        | 1.88 (1.62,2.16)                             |
| 2     | New Mexico    | Drug overdose                                  | Hispanic                                      | 698,062           | 254       |                                        | 0.94 (0.72,1.17)                             |
|       |               |                                                | Non-Hispanic American Indian or Alaska Native | 135,495           | 14        | small death counts                     | -                                            |
|       |               |                                                | Non-Hispanic Asian                            | 25,511            | 2         | small populations & small death counts | -                                            |
|       |               |                                                | Non-Hispanic Black                            | 32,153            | 8         | small death counts                     | -                                            |
|       |               |                                                | Non-Hispanic White                            | 709,715           | 190       |                                        | 0.75 (0.48,1.06)                             |
| 3     | Mississippi   | Unintentional injuries excluding drug overdose | Hispanic                                      | 54,559            | 23        | small death counts                     | -                                            |
|       |               |                                                | Non-Hispanic American Indian or Alaska Native | 10,509            | 7         | small populations & small death counts | -                                            |
|       |               |                                                | Non-Hispanic Asian                            | 23,108            | 6         | small death counts                     | -                                            |
|       |               |                                                | Non-Hispanic Black                            | 827,308           | 453       |                                        | 0.82 (0.62,1.04)                             |
|       |               |                                                | Non-Hispanic White                            | 1,413,502         | 930       |                                        | 0.80 (0.61,1.00)                             |
| 4     | Louisiana     | Drug overdose                                  | Hispanic                                      | 140,666           | 9         | small death counts                     | -                                            |
|       |               |                                                | Non-Hispanic American Indian or Alaska Native | 23,284            | 3         | small death counts                     | -                                            |
|       |               |                                                | Non-Hispanic Asian                            | 61,623            | 3         | small death counts                     | -                                            |
|       |               |                                                | Non-Hispanic Black                            | 1,121,505         | 239       |                                        | 0.79 (0.66,0.95)                             |
|       |               |                                                | Non-Hispanic White                            | 2,275,684         | 572       |                                        | 0.91 (0.77,1.07)                             |
| 5     | Kentucky      | Drug overdose                                  | Hispanic                                      | 86,829            | 6         | small death counts                     | -                                            |
|       |               |                                                | Non-Hispanic American Indian or Alaska Native | 7,830             | 0         | small populations & small death counts | -                                            |
|       |               |                                                | Non-Hispanic Asian                            | 44,705            | 1         | small death counts                     | -                                            |
|       |               |                                                | Non-Hispanic Black                            | 268,423           | 41        | small death counts                     | -                                            |
|       |               |                                                | Non-Hispanic White                            | 3,066,947         | 970       |                                        | 1.19 (1.05,1.32)                             |
| 6     | Tennessee     | Drug overdose                                  | Hispanic                                      | 188,570           | 11        | small death counts                     | -                                            |
|       |               |                                                | Non-Hispanic American Indian or Alaska Native | 15,235            | 2         | small populations & small death counts | -                                            |
|       |               |                                                | Non-Hispanic Asian                            | 82,733            | 3         | small death counts                     | -                                            |
|       |               |                                                | Non-Hispanic Black                            | 821,884           | 221       |                                        | 0.86 (0.73,1.04)                             |
|       |               |                                                | Non-Hispanic White                            | 4,003,852         | 1,069     |                                        | 0.92 (0.82,1.02)                             |

See footnotes at the end of table.

Supplementary Table S6: Race & ethnicity groups most affected by the leading caregiver loss cause-of-death in the ten U.S. states with highest orphanhood prevalence rates in 2021.

| Rank* | U.S. state | Leading caregiver loss cause-of-death          | Standardized race & ethnicity                 | Population size** | Deaths*** | Exclusion criteria                                  | Orphanhood prevalence rate per 100 children† |
|-------|------------|------------------------------------------------|-----------------------------------------------|-------------------|-----------|-----------------------------------------------------|----------------------------------------------|
| 7     | Alabama    | Diseases of heart                              | Hispanic                                      | 113,163           | 35        | small death counts                                  | -                                            |
|       |            |                                                | Non-Hispanic American Indian or Alaska Native | 22,716            | 14        | small populations & small death counts              | -                                            |
|       |            |                                                | Non-Hispanic Asian                            | 48,085            | 14        | small death counts                                  | -                                            |
|       |            |                                                | Non-Hispanic Black                            | 973,707           | 2,922     |                                                     | 0.71 (0.56,0.87)                             |
|       |            |                                                | Non-Hispanic White                            | 2,658,856         | 9,905     |                                                     | 0.69 (0.59,0.80)                             |
| 8     | Oklahoma   | Unintentional injuries excluding drug overdose | Hispanic                                      | 218,343           | 60        | small death counts                                  | -                                            |
|       |            |                                                | Non-Hispanic American Indian or Alaska Native | 254,133           | 198       |                                                     | 1.22 (0.85,1.77)                             |
|       |            |                                                | Non-Hispanic Asian                            | 63,860            | 11        | small death counts                                  | -                                            |
|       |            |                                                | Non-Hispanic Black                            | 225,681           | 113       |                                                     | 0.65 (0.45,1.14)                             |
|       |            |                                                | Non-Hispanic White                            | 2,205,212         | 1,251     |                                                     | 0.87 (0.71,1.02)                             |
| 9     | Ohio       | Drug overdose                                  | Hispanic                                      | 246,561           | 36        | small death counts                                  | -                                            |
|       |            |                                                | Non-Hispanic American Indian or Alaska Native | 23,565            | 3         | small populations & small death counts              | -                                            |
|       |            |                                                | Non-Hispanic Asian                            | 182,029           | 5         | small death counts                                  | -                                            |
|       |            |                                                | Non-Hispanic Black                            | 1,104,289         | 421       |                                                     | 0.95 (0.80,1.11)                             |
|       |            |                                                | Non-Hispanic White                            | 7,747,715         | 2,081     |                                                     | 1.18 (1.10,1.27)                             |
| 10    | Florida    | Drug overdose                                  | Hispanic                                      | 3,423,469         | 414       | large discrepancy in estimates                      | -                                            |
|       |            |                                                | Non-Hispanic American Indian or Alaska Native | 46,070            | 7         | small death counts & large discrepancy in estimates | -                                            |
|       |            |                                                | Non-Hispanic Asian                            | 422,975           | 13        | small death counts & large discrepancy in estimates | -                                            |
|       |            |                                                | Non-Hispanic Black                            | 2,271,752         | 360       | large discrepancy in estimates                      | -                                            |
|       |            |                                                | Non-Hispanic White                            | 9,595,347         | 2,775     | large discrepancy in estimates                      | -                                            |

\*: U.S. states ranked by highest orphanhood prevalence in 2021. \*\*: Average population size of people older than 15 years between 2000 to 2021. \*\*\*: Average number of suppression-adjusted death counts between 1999 to 2021 by primary caregiver loss cause-of-death. †: Point estimate of orphanhood prevalence rate per 100 children in 2021 in the listed U.S. state and standardized race & ethnicity along with 95% uncertainty ranges. ‘-’ indicates that estimates could not be reliably estimated.

Supplementary Table S6: Race & ethnicity groups most affected by the leading caregiver loss cause-of-death in the ten U.S. states with highest orphanhood prevalence rates in 2021 (continued).



## S1 Extended methods

This Supplementary Text describes the data sources and statistical methods used to estimate cause-specific incidence and prevalence of orphanhood and grandparent caregiver loss among U.S. residents between 2000 and 2021. Our methods are overall similar to Hillis et al. [2021b]a, and extended here to estimate the magnitude of children aged 0-17 years experiencing the death of one or both parents from all causes or the death of a grandparent caregiver from all causes.

The United Nations International Children’s Emergency Fund (UNICEF) defines orphanhood as children experiencing the death of one or both parents [UNAIDS, 2009]. As in Hillis et al. [2021a], we considered mothers of age 15-66 years and fathers of age 15-94 years so the maximum ages of parents at birth of a child were respectively 49 and 77 years. Mortality data were recorded among U.S. residents, and for this reason, orphanhood estimates are restricted to children of U.S. residents. Grandparents play indispensable roles as caregivers for children [United States Census bureau, 2021, Pew Research Center, 2013, US Census Bureau, 2023b, Sowden et al., 2021, Ellis and Simmons, 2014]. We further considered to provide minimum numbers of children who lost a grandparent caregiver, defined as the death of a grandparent caregiver aged older than 30 years living with children in the same household. Mortality data were recorded among U.S. residents, and so grandparent caregiver death estimates are also restricted to children of U.S. resident grandparent caregivers. In Hillis et al. [2021a], we previously stratified grandparent caregivers based on the care they provided into primary grandparent caregivers who were either the guardians of children or co-resided and provided for basic needs of children, as well as secondary grandparent caregivers who co-resided and provided for some needs of children, following the characterizations of Ellis and Simmons [2014]. Here, we report throughout the sum of primary and secondary grandparent caregiver loss (Supplementary Fig. S1).

### S1.1 National-level NCHS mortality data by rankable causes of death, 1983-2021

We obtained line-list mortality data on U.S. residents from the NCHS Vital Statistics portal for each year from 1983 to 2021 [National Center for Health Statistics, 2023]. Data were collected from 1983 onwards because the corresponding children who lost a caregiver in 1983 at age 0 were of age 17 in 2000, and so entered our estimation of orphanhood prevalence in 2000. For each mortality record we retained year of death, the corresponding codes of the underlying cause-of-death (ICD-9 code and 282 cause recode before 1999; ICD-10 code and 113 cause recode after 1999), and demographic data of the decedent including sex, age at death, and information on race and Hispanic origin [National Center for Health Statistics, 2022].

Information about the race and Hispanic origin of decedents in death certificates is typically reported by the surviving next of kin, or on the basis of observation in the absence of an informant [Rosenberg, 1999]. Race and Hispanic origin were reported in different formats across the study period [Ingram et al., 2003], which we mapped to standardized race and Hispanic origin categories as described in Supplementary Table S7. Specifically, we grouped individuals of Hispanic origin and all individuals of non-Hispanic origin by their race, i.e. ‘Hispanic’, ‘Non-Hispanic American Indian or Alaska Native’, ‘Non-Hispanic Asian or Pacific Islander’, ‘Non-Hispanic Black’, ‘Non-Hispanic White’, and we refer to the resulting categories as “standardized race & ethnicity” for simplicity. Data on Hispanic origin were not available for 1983 (see below). Individuals of other races in 1984-1991 and individuals of more than one race in 2021 were not coded consistently and not included in this study. We note this approach to harmonising race reporting over the study period did not necessarily make the primary data fully comparable. Earlier research shows inaccuracies are limited [Heron,

61 2021, which indicates that the incremental implementation of multiple race reporting in the U.S. is unlikely  
62 to have introduced notable bias in our orphanhood estimates.

63 The underlying cause-of-death is defined by the World Health Organization (WHO) as ‘the disease or  
64 injury which initiated the train of events leading directly to death, or the circumstances of the accident  
65 or violence which produced the fatal injury’ (World Health Organization 2016). For 1983-1998, underlying  
66 causes-of-death were in the data classified with the Ninth Revision of the International Classification of  
67 Diseases (ICD-9) (World Health Organization 1977), and grouped further into 282 selected causes of death,  
68 termed ‘282 cause recode’ (National Center for Health Statistics 1979). For 1999-2021, underlying causes-of-death  
69 were in the data classified with the Tenth Revision of the International Classification of Diseases (ICD-10),  
70 and grouped further into ‘113 Selected Causes of Death’ (National Center for Health Statistics 2020).

71 Due to our interest in orphanhood and caregiver loss, we defined 53 non-overlapping rankable underlying  
72 causes-of-death that we termed ‘caregiver loss causes-of-death’ and that apart from small modifications  
73 are identical to the 52 rankable underlying causes-of-death from the NCHS 113 Selected Causes of Death  
74 list (National Center for Health Statistics 2020, Anderson et al. 2001). The modifications are listed in  
75 Supplementary Table S8. Specifically, we re-categorized drug-induced causes-of-death into ‘Drug overdose’,  
76 joining the ICD-9/ICD-10 causes-of-death ‘Intentional self-poisoning by and exposure to nonopioid analgesics,  
77 antipyretics and antirheumatics’, ‘Intentional self-poisoning by and exposure to antiepileptic, sedative-hypnotic,  
78 antiparkinsonism and psychotropic drugs, not elsewhere classified’, ‘Intentional self-poisoning by and exposure  
79 to narcotics and psychodysleptics [hallucinogens], not elsewhere classified’, ‘Intentional self-poisoning by  
80 and exposure to other drugs acting on the autonomic nervous system’, ‘Intentional self-poisoning by and  
81 exposure to other and unspecified drugs, medicaments and biological substances’ (E950.0-E950.5; X60-X64);  
82 ‘Assault by drugs, medicaments and biological substances’ (E962.0; X85); ‘Accidental poisoning by and  
83 exposure to nonopioid analgesics, antipyretics and antirheumatics’, ‘Accidental poisoning by and exposure to  
84 antiepileptic, sedative-hypnotic, antiparkinsonism and psychotropic drugs, not elsewhere classified’, ‘Accidental  
85 poisoning by and exposure to narcotics and psychodysleptics [hallucinogens], not elsewhere classified’, ‘Accidental  
86 poisoning by and exposure to other drugs acting on the autonomic nervous system’, ‘Accidental poisoning by  
87 and exposure to other and unspecified drugs, medicaments and biological substances’ (E850-E858; X40-X44);  
88 and ‘Poisoning by and exposure to nonopioid analgesics, antipyretics and antirheumatics, undetermined  
89 intent’, ‘Poisoning by and exposure to antiepileptic, sedative-hypnotic, antiparkinsonism and psychotropic  
90 drugs, not elsewhere classified, undetermined intent’, ‘Poisoning by and exposure to narcotics and psychodysleptics  
91 [hallucinogens], not elsewhere classified, undetermined intent’, ‘Poisoning by and exposure to other drugs  
92 acting on the autonomic nervous system, undetermined intent’, ‘Poisoning by and exposure to other and  
93 unspecified drugs, medicaments and biological substances, undetermined intent’ (E980.0-E980.5; Y10-Y14).  
94 We retained these four drug overdose causes-of-death sub-categories as separate drug overdose sub-groups  
95 for the purpose of data harmonization (see below). Correspondingly, we removed the related three drug  
96 overdose causes-of-death sub-categories respectively from ‘Intentional self-harm’, ‘Assault’ and ‘Accidents’.  
97 We renamed these resulting three categories as ‘Suicide excluding drug overdose’, ‘Homicide excluding drug  
98 overdose’ and ‘Unintentional injuries excluding drug overdose’ (see Supplementary Table S8). Finally, to  
99 simplify presentation as in Figure 1 in the main text, we primarily considered COVID-19 and the leading five  
100 causes-of-death between 1983 and 2021 due to our interest in all caregiver loss. Additionally, we included  
101 any cause in the top five for adult ages 15-44 years, as these ages specifically include younger adults who  
102 are more likely to be parents of younger children. The only one addition to our causes when taking this

103 approach was ‘Homicide excluding drug overdose’. Supplementary Table [S9](#) summarises our aggregation  
104 of the 53 rankable causes-of-death into these seven leading caregiver loss cause-of-death groups and ‘Other’  
105 caregiver loss causes-of-death. The ‘Other’ caregiver loss causes-of-death comprise the remaining 46 rankable  
106 caregiver loss causes-of-death and any other causes-of-death that are not included in the NCHS 52 rankable  
107 causes-of-death.

108 We then mapped and aggregated line-list mortality records to the 53 rankable caregiver loss causes-of-death.  
109 This was done by mapping the 1983-1998 line list data using the 282 recodes to the 52 NCHS rankable  
110 causes-of-death as described in [National Center for Health Statistics, 1988](#) on page 282ff and page 290ff.  
111 For drug-induced causes, we used Table 2 in [National Center for Injury Prevention and Control \(U.S.\).  
112 Division of Unintentional Injury Prevention. Health Systems and Trauma Systems Branch. Prescription  
113 Drug Overdose Team, 2013](#). Supplementary Table [S9](#) summarises our approach.

114 For 1999-2021, we mapped ICD-10 113 cause recodes to NCHS 52 rankable causes-of-death based on Table  
115 A in [Curtin SC, 2023](#), and subsequently mapped the NCHS 52 rankable causes-of-death to the 53 rankable  
116 caregiver loss causes-of-death based on Supplementary Table [S9](#).

117 Next, we aggregated line-list death records to annualised death counts by the 53 rankable caregiver loss  
118 causes-of-death for each year in 1983-2021, as well as by sex, age band (15-19, 20-24, 25-29, 30-34, 35-39,  
119 40-44, 45-49, 50-54, 55-59, 60-64, 65-69, 70-74, 75-79, 80-84 and 85+ years) and standardized race & ethnicity  
120 of the decedent. Data on race and ethnicity were not available for 1983, and for this year we attributed  
121 mortality counts to standardized race categories according to the age-, sex- and cause-of-death-specific  
122 standardized race compositions in 1984. To harmonise cause-of-death data from 1983-1999 to the ICD-10  
123 cause-of-death classifications and avoid discontinuities in our orphanhood estimates from 1998 to 1999, we  
124 used where available the comparability ratios in Table 1 of [Anderson et al., 2001](#). Thirteen comparability  
125 ratios of rankable causes of death were not provided in [Anderson et al., 2001](#) when underlying estimations  
126 were considered imprecise, and in these cases we set the comparability ratios to 1. Supplementary Fig. [S4](#)  
127 illustrates the aggregated annual mortality data among U.S. residents by standardized race categories, and  
128 Supplementary Fig. [S5](#) by leading causes-of-death as relevant for caregiver loss and orphanhood.

| Standardized race categories                                     | Time period (years)                                                                                                                                                       |                                                                                                                                                                                                                                                                         |                                                 |                                                                                                                                                                                                             |
|------------------------------------------------------------------|---------------------------------------------------------------------------------------------------------------------------------------------------------------------------|-------------------------------------------------------------------------------------------------------------------------------------------------------------------------------------------------------------------------------------------------------------------------|-------------------------------------------------|-------------------------------------------------------------------------------------------------------------------------------------------------------------------------------------------------------------|
|                                                                  | 1984-1991                                                                                                                                                                 | 1992-2003                                                                                                                                                                                                                                                               | 2004-2020                                       | 2021                                                                                                                                                                                                        |
| American Indian or Alaska Native<br>Asian<br>or Pacific Islander | American Indian (includes Aleuts and Eskimos)<br>Chinese; Japanese; Filipino;<br>Hawaiian (includes Part-Hawaiian);<br>Other Asian or Pacific Islander                    | American Indian (includes Aleuts and Eskimos)<br>Chinese; Japanese; Filipino;<br>Hawaiian (includes Part-Hawaiian);<br>Asian Indian; Korean; Samoan;<br>Vietnamese; Guamanian;<br>Other Asian or Pacific Islander in areas;<br>Combined other Asian or Pacific Islander | American Indian<br>Asian<br>or Pacific Islander | American Indian or Alaskan Native<br>Chinese; Japanese; Filipino;<br>Hawaiian; Asian Indian;<br>Korean; Samoan;<br>Vietnamese; Guamanian;<br>Other or Multiple Asian;<br>Other or Multiple Pacific Islander |
| Black<br>or African American                                     | Black                                                                                                                                                                     | Black                                                                                                                                                                                                                                                                   | Black                                           | Black                                                                                                                                                                                                       |
| White                                                            | White                                                                                                                                                                     | White                                                                                                                                                                                                                                                                   | White                                           | White                                                                                                                                                                                                       |
| Not included in study <sup>†</sup>                               | Other races                                                                                                                                                               | -                                                                                                                                                                                                                                                                       | -                                               | More than one race                                                                                                                                                                                          |
| <b>Ethnicity</b>                                                 |                                                                                                                                                                           |                                                                                                                                                                                                                                                                         |                                                 |                                                                                                                                                                                                             |
| Hispanic origin                                                  | Spaniard; Mexican; Puerto Rican; Cuban; Dominican; Central or South American; Central American; South American; Latin American; Other and Unknown Spanish; Other Hispanic |                                                                                                                                                                                                                                                                         |                                                 |                                                                                                                                                                                                             |

<sup>†</sup>: Individuals of other races in 1984-1991 and individuals of more than one race in 2021 were not coded consistently and not included in this study, which corresponded to 0.0068% of all death records in 1983-1991 and 0.47% in 2021.

Supplementary Table S7: Mapping of single-race mortality data to standardized race categories and Hispanic origin.

| ID | Caregiver loss<br>causes-of-death                                                     | NCHS 52 rankable<br>underlying causes-of-death <sup>†</sup>                           | Further modifications <sup>‡</sup>  |                                                  |
|----|---------------------------------------------------------------------------------------|---------------------------------------------------------------------------------------|-------------------------------------|--------------------------------------------------|
|    |                                                                                       |                                                                                       | ICD-9                               | ICD-10                                           |
| 1  | Acute bronchitis and bronchiolitis                                                    | Acute bronchitis and bronchiolitis                                                    | -                                   | -                                                |
| 2  | Acute poliomyelitis                                                                   | Acute poliomyelitis                                                                   | -                                   | -                                                |
| 3  | Alzheimer disease                                                                     | Alzheimer disease                                                                     | -                                   | -                                                |
| 4  | Anemias                                                                               | Anemias                                                                               | -                                   | -                                                |
| 5  | Aortic aneurysm and dissection                                                        | Aortic aneurysm and dissection                                                        | -                                   | -                                                |
| 6  | Arthropod-borne viral encephalitis                                                    | Arthropod-borne viral encephalitis                                                    | -                                   | -                                                |
| 7  | Atherosclerosis                                                                       | Atherosclerosis                                                                       | -                                   | -                                                |
| 8  | Cerebrovascular diseases                                                              | Cerebrovascular diseases                                                              | -                                   | -                                                |
| 9  | Certain conditions originating in the<br>perinatal period                             | Certain conditions originating in the<br>perinatal period                             | -                                   | -                                                |
| 10 | Cholelithiasis and other disorders of gallbladder                                     | Cholelithiasis and other disorders of gallbladder                                     | -                                   | -                                                |
| 11 | Chronic liver disease and cirrhosis                                                   | Chronic liver disease and cirrhosis                                                   | -                                   | -                                                |
| 12 | Chronic lower respiratory diseases                                                    | Chronic lower respiratory diseases                                                    | -                                   | -                                                |
| 13 | Complications of medical and surgical care                                            | Complications of medical and surgical care                                            | -                                   | -                                                |
| 14 | Congenital malformations, deformations<br>and chromosomal abnormalities               | Congenital malformations, deformations<br>and chromosomal abnormalities               | -                                   | -                                                |
| 15 | COVID-19                                                                              | COVID-19                                                                              | -                                   | -                                                |
| 16 | Diabetes mellitus                                                                     | Diabetes mellitus                                                                     | -                                   | -                                                |
| 17 | Diseases of appendix                                                                  | Diseases of appendix                                                                  | -                                   | -                                                |
| 18 | Diseases of heart                                                                     | Diseases of heart                                                                     | -                                   | -                                                |
| 19 | Drug overdose                                                                         |                                                                                       | Adding:                             | Adding:                                          |
|    | ... Assault by drugs                                                                  |                                                                                       | E962.0                              | X85                                              |
|    | ... Intentional self-poisoning                                                        |                                                                                       | E950.0-E950.5                       | X60-X64                                          |
|    | ... Poisoning with undetermined intent                                                |                                                                                       | E980.0-E980.5                       | Y10-Y14                                          |
|    | ... Unintentional self-poisoning                                                      |                                                                                       | E850-E858                           | X40-X44                                          |
| 20 | Enterocolitis due to Clostridium difficile                                            | Enterocolitis due to Clostridium difficile                                            | -                                   | -                                                |
| 21 | Essential hypertension and hypertensive<br>renal disease                              | Essential hypertension and hypertensive<br>renal disease                              | -                                   | -                                                |
| 22 | Hernia                                                                                | Hernia                                                                                | -                                   | -                                                |
| 23 | Homicide, excluding drug overdose                                                     | Assault                                                                               | Removing E962.0 from<br>(E960-E969) | Removing X85 from<br>(*U01 - *U02,X85-Y09,Y87.1) |
| 24 | Human immunodeficiency virus                                                          | Human immunodeficiency virus                                                          | -                                   | -                                                |
| 25 | Hyperplasia of prostate                                                               | Hyperplasia of prostate                                                               | -                                   | -                                                |
| 26 | In situ neoplasms, benign neoplasms<br>and neoplasms of uncertain or unknown behavior | In situ neoplasms, benign neoplasms<br>and neoplasms of uncertain or unknown behavior | -                                   | -                                                |
| 27 | Infections of kidney                                                                  | Infections of kidney                                                                  | -                                   | -                                                |

See footnotes at the end of table.

Supplementary Table S8: Definitions of caregiver loss causes-of-death used in this analysis relative to the 52 rankable causes-of-death included in the NCHS 113 Selected Causes of Death.

| ID | Caregiver loss causes-of-death                  | NCHS 52 rankable underlying causes-of-death <sup>†</sup> | Further modifications <sup>‡</sup>             |                                              |
|----|-------------------------------------------------|----------------------------------------------------------|------------------------------------------------|----------------------------------------------|
|    |                                                 |                                                          | ICD-9                                          | ICD-10                                       |
| 28 | Inflammatory diseases of female pelvic organs   | Inflammatory diseases of female pelvic organs            | -                                              | -                                            |
| 29 | Influenza and pneumonia                         | Influenza and pneumonia                                  | -                                              | -                                            |
| 30 | Legal intervention                              | Legal intervention                                       | -                                              | -                                            |
| 31 | Malaria                                         | Malaria                                                  | -                                              | -                                            |
| 32 | Malignant neoplasms                             | Malignant neoplasms                                      | -                                              | -                                            |
| 33 | Measles                                         | Measles                                                  | -                                              | -                                            |
| 34 | Meningitis                                      | Meningitis                                               | -                                              | -                                            |
| 35 | Meningococcal infection                         | Meningococcal infection                                  | -                                              | -                                            |
| 36 | Nephritis, nephrotic syndrome and nephrosis     | Nephritis, nephrotic syndrome and nephrosis              | -                                              | -                                            |
| 37 | Nutritional deficiencies                        | Nutritional deficiencies                                 | -                                              | -                                            |
| 38 | Operations of war and their sequelae            | Operations of war and their sequelae                     | -                                              | -                                            |
| 39 | Parkinson disease                               | Parkinson disease                                        | -                                              | -                                            |
| 40 | Peptic ulcer                                    | Peptic ulcer                                             | -                                              | -                                            |
| 41 | Pneumoconioses and chemical effects             | Pneumoconioses and chemical effects                      | -                                              | -                                            |
| 42 | Pneumonitis due to solids and liquids           | Pneumonitis due to solids and liquids                    | -                                              | -                                            |
| 43 | Pregnancy, childbirth and the puerperium        | Pregnancy, childbirth and the puerperium                 | -                                              | -                                            |
| 44 | Salmonella infections                           | Salmonella infections                                    | -                                              | -                                            |
| 45 | Scarlet fever and erysipelas                    | Scarlet fever and erysipelas                             | -                                              | -                                            |
| 46 | Septicemia                                      | Septicemia                                               | -                                              | -                                            |
| 47 | Shigellosis and amebiasis                       | Shigellosis and amebiasis                                | -                                              | -                                            |
| 48 | Suicide, excluding drug overdose                | Intentional self-harm                                    | Removing E950.0-E950.5 from E950-E959          | Removing X60-X64 from (*U03, X60-X84, Y87.0) |
| 49 | Syphilis                                        | Syphilis                                                 | -                                              | -                                            |
| 50 | Tuberculosis                                    | Tuberculosis                                             | -                                              | -                                            |
| 51 | Unintentional injuries, excluding drug overdose | Accidents                                                | Removing E850-E858 from (E800-E869, E880-E929) | Removing X40-X44 from (V01-X59, Y85-Y86)     |
| 52 | Viral hepatitis                                 | Viral hepatitis                                          | -                                              | -                                            |
| 53 | Whooping cough                                  | Whooping cough                                           | -                                              | -                                            |
|    | Other                                           | Other                                                    | -                                              | -                                            |

<sup>†</sup>: The subset of the NCHS 113 Selected cause list with the reported cause names. Empty cells represent that the corresponding causes of death are not in the NCHS 113 Selected cause list. <sup>‡</sup>: '-' denotes there were no modifications from the NCHS 52 rankable causes-of-death to caregiver loss causes-of-death.

Supplementary Table S8: Definitions of caregiver loss causes-of-death used in this analysis relative to the 52 rankable causes-of-death included in the NCHS 113 Selected Causes of Death (continued).

| ID | Caregiver loss causes-of-death <sup>†</sup>                                        | ICD-9 code range                  | ICD-10 code range             | Aggregation into leading caregiver loss causes-of-death groups |
|----|------------------------------------------------------------------------------------|-----------------------------------|-------------------------------|----------------------------------------------------------------|
| 1  | Acute bronchitis and bronchiolitis                                                 | (466)                             | (J20-J21)                     | Other                                                          |
| 2  | Acute poliomyelitis                                                                | (045)                             | (A80)                         | Other                                                          |
| 3  | Alzheimer disease                                                                  | (331.0)                           | (G30)                         | Other                                                          |
| 4  | Anemias                                                                            | (280-285)                         | (D50-D64)                     | Other                                                          |
| 5  | Aortic aneurysm and dissection                                                     | (441)                             | (I71)                         | Other                                                          |
| 6  | Arthropod-borne viral encephalitis                                                 | (062-064)                         | (A83-A84,A85.2)               | Other                                                          |
| 7  | Atherosclerosis                                                                    | (440)                             | (I70)                         | Other                                                          |
| 8  | Cerebrovascular diseases                                                           | (430-434,436-438)                 | (I60-I69)                     | Other                                                          |
| 9  | Certain conditions originating in the perinatal period                             | (760-771.2,771.4-779)             | (P00-P96)                     | Other                                                          |
| 10 | Cholelithiasis and other disorders of gallbladder                                  | (574-575)                         | (K80-K82)                     | Other                                                          |
| 11 | Chronic liver disease and cirrhosis                                                | (571)                             | (K70,K73-K74)                 | Other                                                          |
| 12 | Chronic lower respiratory diseases                                                 | (490-494,496)                     | (J40-J47)                     | Other                                                          |
| 13 | Complications of medical and surgical care                                         | (E870-E879,E930-E949)             | (Y40-Y84,Y88)                 | Other                                                          |
| 14 | Congenital malformations, deformations and chromosomal abnormalities               | (740-759)                         | (Q00-Q99)                     | Other                                                          |
| 15 | COVID-19                                                                           | -                                 | (U07.1)                       | COVID-19                                                       |
| 16 | Diabetes mellitus                                                                  | (250)                             | (E10-E14)                     | Other                                                          |
| 17 | Diseases of appendix                                                               | (540-543)                         | (K35-K38)                     | Other                                                          |
| 18 | Diseases of heart                                                                  | (390-398,402,404,410-429)         | (I00-I09,I11,I13,I20-I51)     | Diseases of heart                                              |
| 19 | Drug overdose                                                                      | -                                 | -                             | Drug overdose                                                  |
|    | ... Assault by drugs                                                               | (E962.0)                          | (X85)                         |                                                                |
|    | ... Intentional self-poisoning                                                     | (E950.0-E950.5)                   | (X60-X64)                     |                                                                |
|    | ... Poisoning with undetermined intent                                             | (E980.0-E980.5)                   | (Y10-Y14)                     |                                                                |
|    | ... Unintentional self-poisoning                                                   | (E850-E858)                       | (X40-X44)                     |                                                                |
| 20 | Enterocolitis due to Clostridium difficile                                         | -                                 | (A04.7)                       | Other                                                          |
| 21 | Essential hypertension and hypertensive renal disease                              | (401,403)                         | (I10,I12,I15)                 | Other                                                          |
| 22 | Hernia                                                                             | (550-553)                         | (K40-K46)                     | Other                                                          |
| 23 | Homicide excluding drug overdose                                                   | (E960-E961.9, E962.1-E969)        | (*U01 - *U02, X86-Y09, Y87.1) | Homicide excluding drug overdose                               |
| 24 | Human immunodeficiency virus                                                       | (042-044)                         | (B20-B24)                     | Other                                                          |
| 25 | Hyperplasia of prostate                                                            | (600)                             | (N40)                         | Other                                                          |
| 26 | In situ neoplasms, benign neoplasms and neoplasms of uncertain or unknown behavior | (210-239)                         | (D00-D48)                     | Other                                                          |
| 27 | Infections of kidney                                                               | (590)                             | (N10-N12,N13.6,N15.1)         | Other                                                          |
| 28 | Inflammatory diseases of female pelvic organs                                      | (614-616)                         | (N70-N76)                     | Other                                                          |
| 29 | Influenza and pneumonia                                                            | (480-487)                         | (J09-J18)                     | Other                                                          |
| 30 | Legal intervention                                                                 | (E970-E978)                       | (Y35,Y89.0)                   | Other                                                          |
| 31 | Malaria                                                                            | (084)                             | (B50-B54)                     | Other                                                          |
| 32 | Malignant neoplasms                                                                | (140-208)                         | (C00-C97)                     | Malignant neoplasms                                            |
| 33 | Measles                                                                            | (055)                             | (B05)                         | Other                                                          |
| 34 | Meningitis                                                                         | (320-322)                         | (G00,G03)                     | Other                                                          |
| 35 | Meningococcal infection                                                            | (036)                             | (A39)                         | Other                                                          |
| 36 | Nephritis, nephrotic syndrome and nephrosis                                        | (580-589)                         | (N00-N07,N17-N19,N25-N27)     | Other                                                          |
| 37 | Nutritional deficiencies                                                           | (260-269)                         | (E40-E64)                     | Other                                                          |
| 38 | Operations of war and their sequelae                                               | (E990-E999)                       | (Y36,Y89.1)                   | Other                                                          |
| 39 | Parkinson disease                                                                  | (332)                             | (G20-G21)                     | Other                                                          |
| 40 | Peptic ulcer                                                                       | (531-534)                         | (K25-K28)                     | Other                                                          |
| 41 | Pneumoconioses and chemical effects                                                | (500-506)                         | (J60-J66,J68,U07.0)           | Other                                                          |
| 42 | Pneumonitis due to solids and liquids                                              | (507)                             | (J69)                         | Other                                                          |
| 43 | Pregnancy, childbirth and the puerperium                                           | (630-676)                         | (O00-O99)                     | Other                                                          |
| 44 | Salmonella infections                                                              | (002-003)                         | (A01-A02)                     | Other                                                          |
| 45 | Scarlet fever and erysipelas                                                       | (034.1-035)                       | (A38,A46)                     | Other                                                          |
| 46 | Septicemia                                                                         | (038)                             | (A40-A41)                     | Other                                                          |
| 47 | Shigellosis and amebiasis                                                          | (004,006)                         | (A03,A06)                     | Other                                                          |
| 48 | Suicide excluding drug overdose                                                    | (E950.6-E959)                     | (*U03, X65-X84, Y87.0)        | Suicide excluding drug overdose                                |
| 49 | Syphilis                                                                           | (090-097)                         | (A50-A53)                     | Other                                                          |
| 50 | Tuberculosis                                                                       | (010-018)                         | (A16-A19)                     | Other                                                          |
| 51 | Unintentional injuries excluding drug overdose                                     | (E800-E849, E859-E869, E880-E929) | (V01-X39, X45-59, Y85-Y86)    | Unintentional injuries excluding drug overdose                 |
| 52 | Viral hepatitis                                                                    | (070)                             | (B15-B19)                     | Other                                                          |
| 53 | Whooping cough                                                                     | (033)                             | (A37)                         | Other                                                          |
|    | Other                                                                              | *                                 | *                             | Other                                                          |

†: To account for all mortality data, we grouped death counts into the ‘Other’ category if the corresponding cause-of-death was not among the 53 caregiver loss causes-of-death. Drug overdose subcategories are listed separately for clarity on our mappings. ‘-’ denotes there was no corresponding ICD-9 cause-of-death. ‘\*’ denotes any other ICD-9 codes or ICD-10 codes not listed above.

Supplementary Table S9: Aggregation of 53 rankable caregiver loss causes-of-death into leading caregiver loss causes-of-death groups.

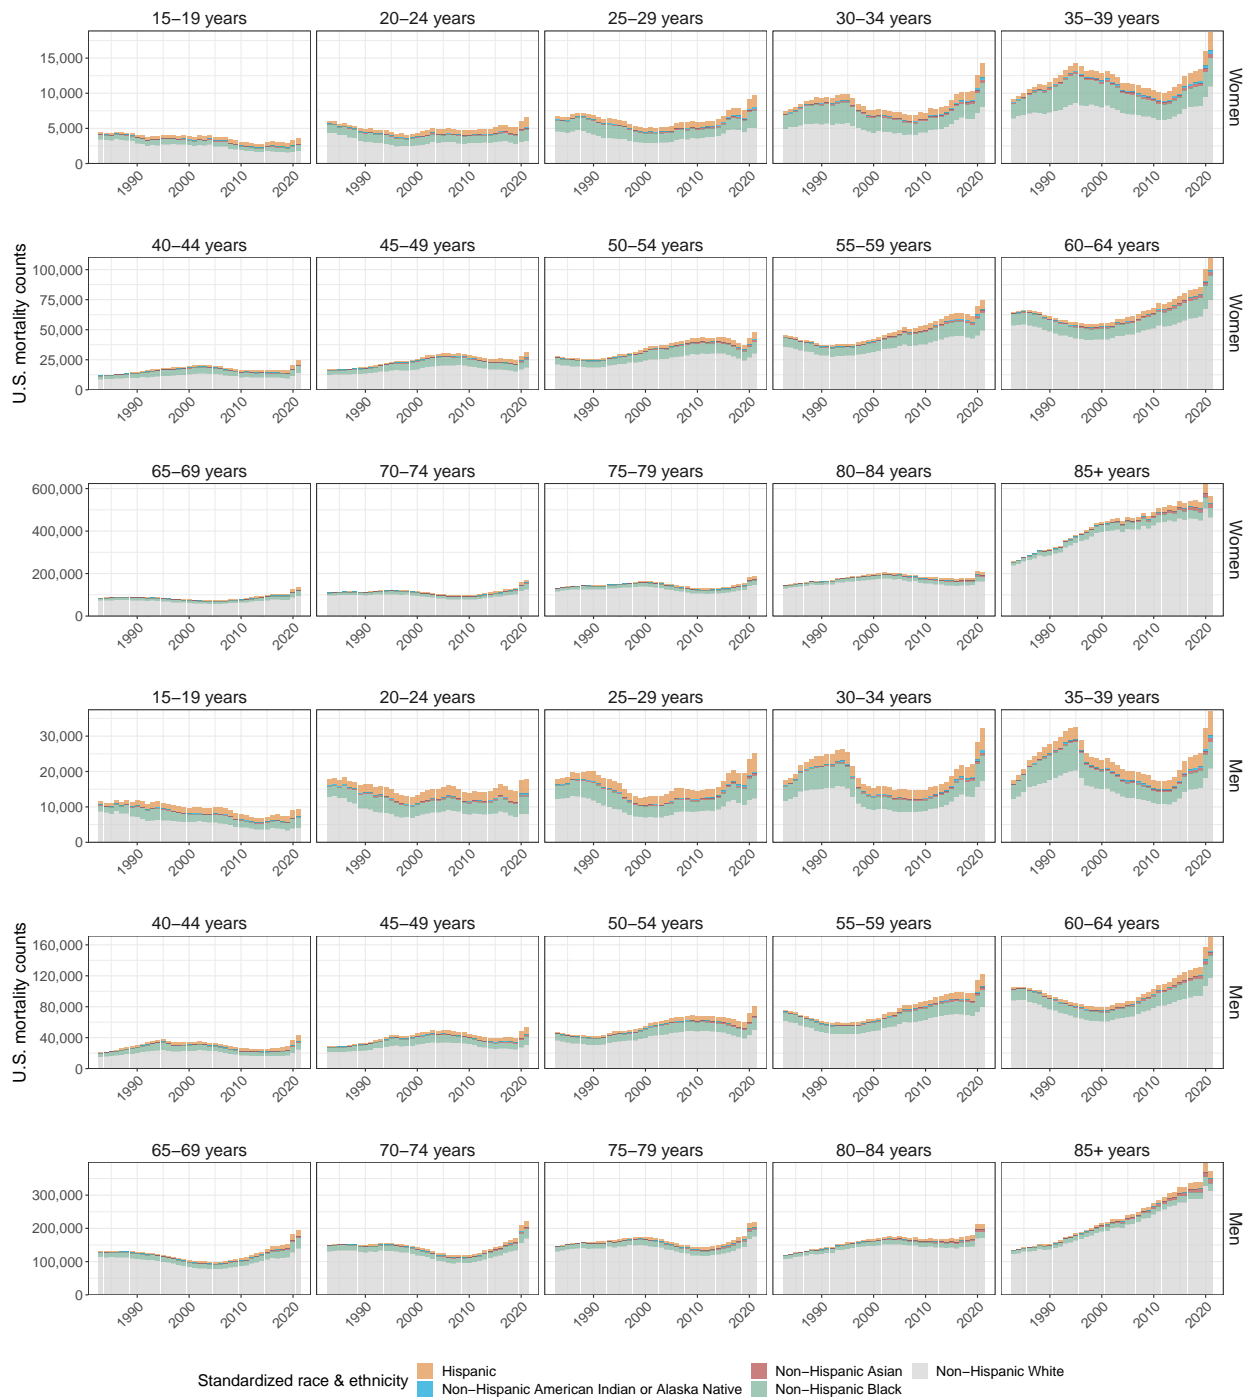

Supplementary Fig. S4: Aggregated age- and sex-specific U.S. mortality counts in 1983-2021, by standardized race & ethnicity.



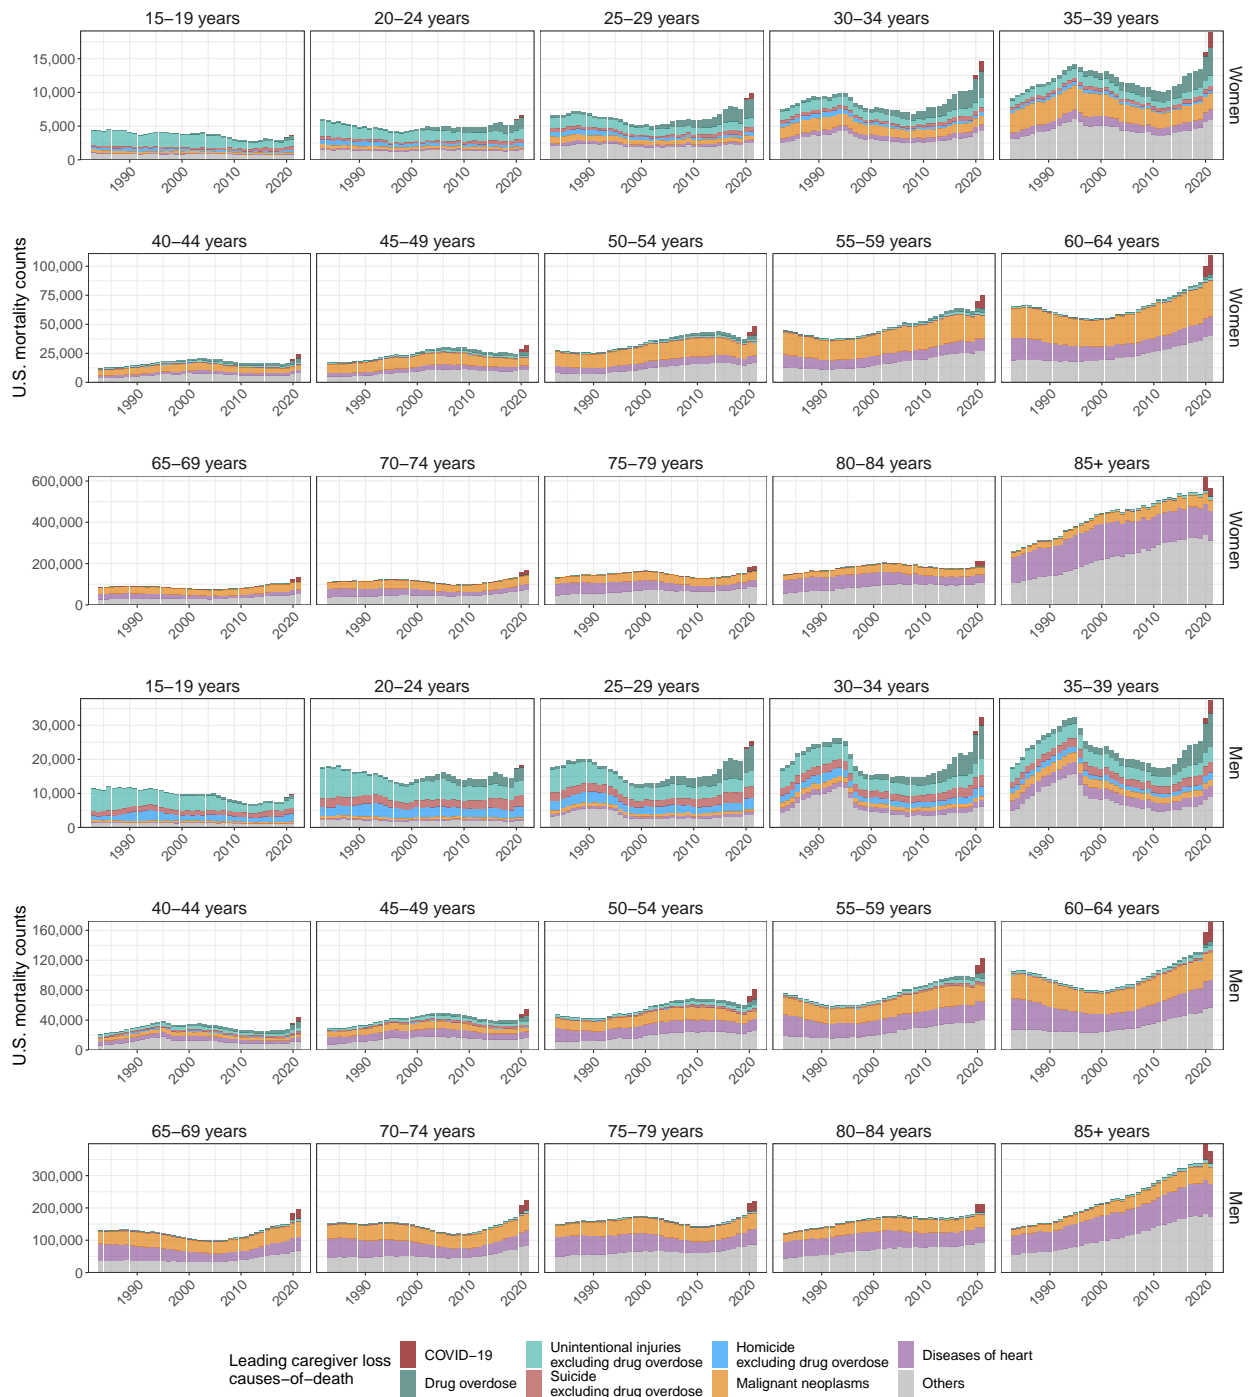

Supplementary Fig. S5: Aggregated age- and sex-specific U.S. mortality counts in 1983-2021, by leading causes-of-death as relevant for caregiver loss and orphanhood.

## 129 S1.2 National-level live births data, 1969-2021

130 To calculate fertility rates and attribute children experiencing orphanhood to decedents between 1983 to  
131 2021, we required for our approach to estimating orphanhood live births data from before 1983 because  
132 the children who lost a caregiver in 1983 at age 1-17 years were born between 1966-1982. However due to  
133 limitations in publicly available population size data, we only considered in the central analysis live births  
134 data from 1990 and assumed constant fertility rates before 1990. We investigated the sensitivity of our  
135 orphanhood estimates to this assumption using live birth records since 1980 together with corresponding  
136 population size estimates, and found that orphanhood prevalence estimates since 2008 were not affected  
137 by our assumptions on historic fertility, while in the sensitivity analysis orphanhood prevalence estimates  
138 for 2000-2007 were slightly lower due to overall lower fertility rates in the 1980s (Supplementary Text S2).  
139 Line-list live births with demographic data on both mothers and fathers were available and downloaded from  
140 the NCHS Vital Statistics portal for each year between 1969 to 2021 [National Center for Health Statistics,  
141 2023]. We considered only live birth records to U.S. resident mothers for consistency with the mortality data  
142 available. Information on residency status of fathers was not available, and we assumed fathers were also U.S.  
143 residents in the retained birth records associated with U.S. resident mothers. For each live birth, we retained  
144 year of birth, the age of mothers and fathers, and information on race and Hispanic ethnicity [National  
145 Center for Health Statistics, 2023].

146 Age of mothers and fathers was reported by single year of age. Following [Hillis et al. 2021a], we considered  
147 live births to women aged 15-49 years and men aged 15-77 years, to match the mortality data of women  
148 aged 15-66 years and men aged 15-94 years. In total, less than 0.01% of line-list records were removed from  
149 further analysis because parent were outside of these age ranges. Age information was mapped to 5-year age  
150 bands 15-19 years, . . . , 45-49 years for mothers and age bands 15-19 years, . . . , 50-54 years, and 55 years  
151 and older (55+ years) for fathers.

152 Information about the race and Hispanic origin of mothers and fathers was between 1969-2021 reported in  
153 different standards due to the revision of the U.S. certificates of live births on race in 1989 and 2003 [National  
154 Center for Health Statistics, 2006]. Information on the race of mothers and fathers is publicly available since  
155 1969, and information on their ethnicity since 1978. For 1978-2021, we mapped available information on  
156 race and ethnicity to the same standardized race & ethnicity categories used to stratify the mortality data,  
157 according to the mapping described in Supplementary Table S10.

158 Next, we aggregated line-list live birth records to annualized live birth counts to mothers (in age bands  
159 15-19, . . . , 45-49 years) and fathers (in age bands 15-19, . . . , 55+ years) for each year in 1969-1977, and  
160 stratified further by standardized race & ethnicity categories for each year in 1978-2021. Before 1985, data  
161 reporting was incomplete for some U.S. states and we used NCHS sampling weights reported in each year  
162 (see Appendix A of [National Center for Health Statistics 1978]) to extrapolate reported live birth counts  
163 to state populations. Supplementary Fig. S6 illustrates the aggregated annual live birth counts by mothers  
164 and fathers and standardized race & ethnicity categories since 1978.

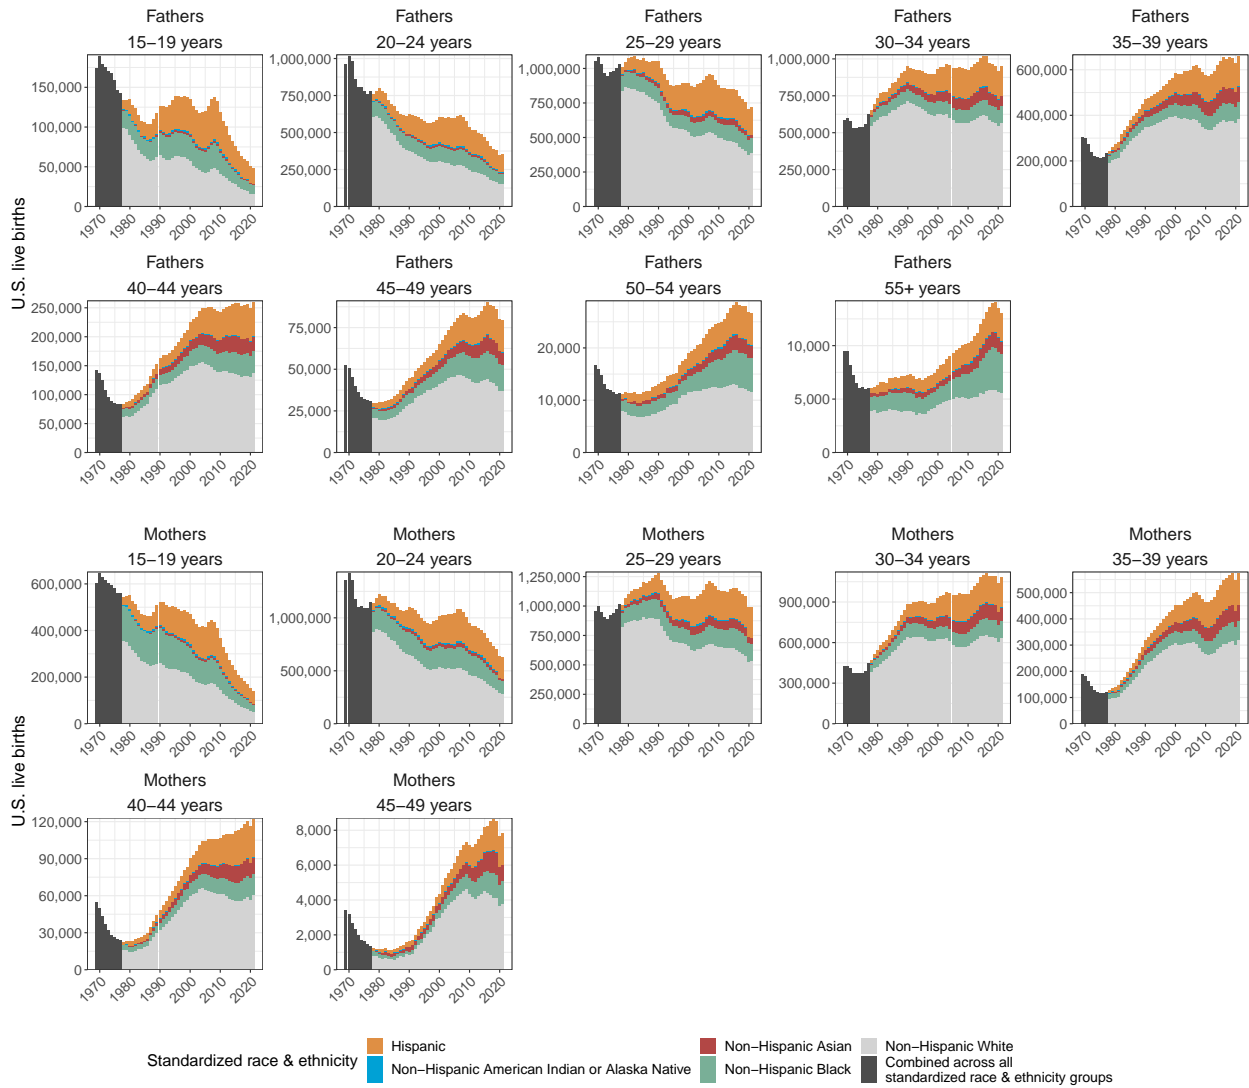

Supplementary Fig. S6: Aggregated age-specific live births counts in 1969-2021, by standardized race & ethnicity categories. Prior to 1978, information on ethnicity was not publicly available and live birth counts are shown without standardized race & ethnicity stratification.

| Standardized race categories                                                | Time period (years)                                                                                                               |                                                                                                                                                                         |                                                                                                                                                                         |                                                                                                                                                                                                                                              |                                                 |                                                                           |
|-----------------------------------------------------------------------------|-----------------------------------------------------------------------------------------------------------------------------------|-------------------------------------------------------------------------------------------------------------------------------------------------------------------------|-------------------------------------------------------------------------------------------------------------------------------------------------------------------------|----------------------------------------------------------------------------------------------------------------------------------------------------------------------------------------------------------------------------------------------|-------------------------------------------------|---------------------------------------------------------------------------|
|                                                                             | 1969-1977                                                                                                                         | 1978-1988                                                                                                                                                               | 1989-1991                                                                                                                                                               | 1992-2002                                                                                                                                                                                                                                    | 2003-2016                                       | 2017-2021                                                                 |
| American Indian or Alaska Native<br>Asian<br>or Pacific Islander            | American Indian<br>(includes Aleuts and Eskimos)<br>Chinese; Japanese; Filipino;<br>Guamian; Hawaiian<br>(includes Part-Hawaiian) | American Indian<br>(includes Aleuts and Eskimos)<br>Chinese; Japanese; Filipino;<br>Hawaiian<br>(includes Part-Hawaiian)<br>Other Asian<br>or Pacific Islander in areas | American Indian<br>(includes Aleuts and Eskimos)<br>Chinese; Japanese; Filipino;<br>Hawaiian<br>(includes Part-Hawaiian)<br>Other Asian<br>or Pacific Islander in areas | American Indian<br>(includes Aleuts and Eskimos)<br>Chinese; Japanese; Filipino;<br>Hawaiian<br>(includes Part-Hawaiian);<br>Asian Indian; Korean; Samoan;<br>Vietnamese; Guamanian;<br>Other Asian<br>or Pacific Islander in areas<br>Black | American Indian<br>Asian<br>or Pacific Islander | American Indian<br>Asian;<br>Native Hawaiian or<br>Other Pacific Islander |
| Black<br>or African American<br>White<br>Not included in study <sup>†</sup> | Negro<br><br>White<br>Other non-White<br>Not stated                                                                               | Black<br><br>White<br>Other non-White<br>Not stated                                                                                                                     | Black<br><br>White<br>Other races<br>Not stated                                                                                                                         | White<br>More than one race<br>Not stated                                                                                                                                                                                                    | Black<br><br>White<br>-                         | Black<br><br>White<br>More than one race<br>Not stated                    |
| <b>Ethnicity</b>                                                            | <b>1978-2021</b>                                                                                                                  |                                                                                                                                                                         |                                                                                                                                                                         |                                                                                                                                                                                                                                              |                                                 |                                                                           |
| Hispanic origin                                                             | Mexican; Puerto Rican; Cuban; Dominican; Central or South American; Other and Unknown Spanish                                     |                                                                                                                                                                         |                                                                                                                                                                         |                                                                                                                                                                                                                                              |                                                 |                                                                           |

<sup>†</sup>: Individuals of other non-White; note stated; other races in 1969-1991 and 2003-2016 and individuals of more than one race or note stated race in 1992-2002 and 2017-2021 were not coded consistently and not included in this study.

Supplementary Table S10: Mapping of single-race live birth data to standardized race categories and Hispanic origin.

### 165 **S1.3 National-level population size data, 1990-2021**

166 To calculate fertility rates, we further required population size data of U.S. residents in the age-, sex- and  
167 standardized race & ethnicity categories of the live births data. We obtained from the CDC WONDER  
168 Vintage bridged-race postcensal & ethnicity population size estimates for each year in 1990-1999 and  
169 2000-2020 [CDC, 2021a], and single race population size estimates for 2021 [CDC, 2021b]. Data were  
170 extracted by 5-year age bands (15-19 years, . . . , 70-74 years) and single years of age from 75 to 77 years, and  
171 data for individuals aged 55-77 years were summed into a single age band as required for the purposes of  
172 our analyses. Race-specific population size estimates were aggregated to the standardized race & ethnicity  
173 categories in Supplementary Table [S11](#).

174 Bridged-race & ethnicity population size data were not publicly available prior to 1990. For sensitivity  
175 analyses, we also obtained national-level population size estimates by 5-year age bands, sex, and U.S. states  
176 without race & ethnicity stratification for each year in 1969-1989 from the U.S. National Cancer Institute  
177 Surveillance, Epidemiology, and End Results (SEER) Program [National Cancer Institute, 2023].

| Standardized race categories                                  | Time period (years)                                           |                                                                        |
|---------------------------------------------------------------|---------------------------------------------------------------|------------------------------------------------------------------------|
|                                                               | 1990-2020                                                     | 2021                                                                   |
| American Indian or Alaska Native<br>Asian or Pacific Islander | American Indian or Alaska Native<br>Asian or Pacific Islander | American Indian or Alaska Native<br>Asian                              |
| Black or African American                                     | Black or African American                                     | Native Hawaiian or Other Pacific Islander<br>Black or African American |
| White                                                         | White                                                         | White                                                                  |
| Not included in study <sup>†</sup>                            |                                                               | More than one race                                                     |
| Ethnicity                                                     | 1978-2021                                                     |                                                                        |
| Hispanic origin                                               | Hispanic or Latino                                            |                                                                        |

<sup>†</sup>: Individuals of more than one race in 2021 were not coded consistently and not included in this study.

Supplementary Table S11: Mapping of single-race population size data to standardized race categories and Hispanic origin.

## 178 S1.4 Estimates of national-level fertility rates, 1990-2021

179 We calculated age-, sex- and standardized race & ethnicity-specific fertility rates in each year in 1990-2021  
180 for women in one of the age bands  $a \in \{15 - 19, \dots, 45 - 49\}$  years and men in one of the age bands  
181  $a \in \{15 - 19, \dots, 55 - 77\}$  years according to

$$FR_{y,a,s,r} = \frac{B_{y,a,s,r}}{P_{y,a,s,r}}, \quad (1)$$

182 where the number of live births and population sizes in each strata are denoted by  $B_{y,a,s,r}$  and  $P_{y,a,s,r}$   
183 respectively. Calculations were done for each of the five standardized race categories ‘Hispanic’, ‘Non-Hispanic  
184 American Indian or Alaska Native’, ‘Non-Hispanic Asian or Pacific Islander’, ‘Non-Hispanic Black’ and  
185 ‘Non-Hispanic White’. In the central analysis, we assumed the same fertility rates in each year in 1966-1989  
186 as in 1990, and considered alternative assumptions in several sensitivity analyses (see below). Supplementary  
187 Fig. S7 shows the calculated U.S. fertility rates by standardized race & ethnicity.

188 Mortality rates were calculated in analogy to Eq. (1). We found correlations by standardized race & ethnicity  
189 between fertility and mortality rates that changed primarily by age of mothers and fathers, and less so over  
190 calendar years (Supplementary Fig. S8 for women); findings were similar in men. These correlations prompted  
191 us to estimate national-level incidence and prevalence of orphanhood by standardized race & ethnicity and  
192 then sum the standardized race & ethnicity-specific estimates to obtain national-level estimates.

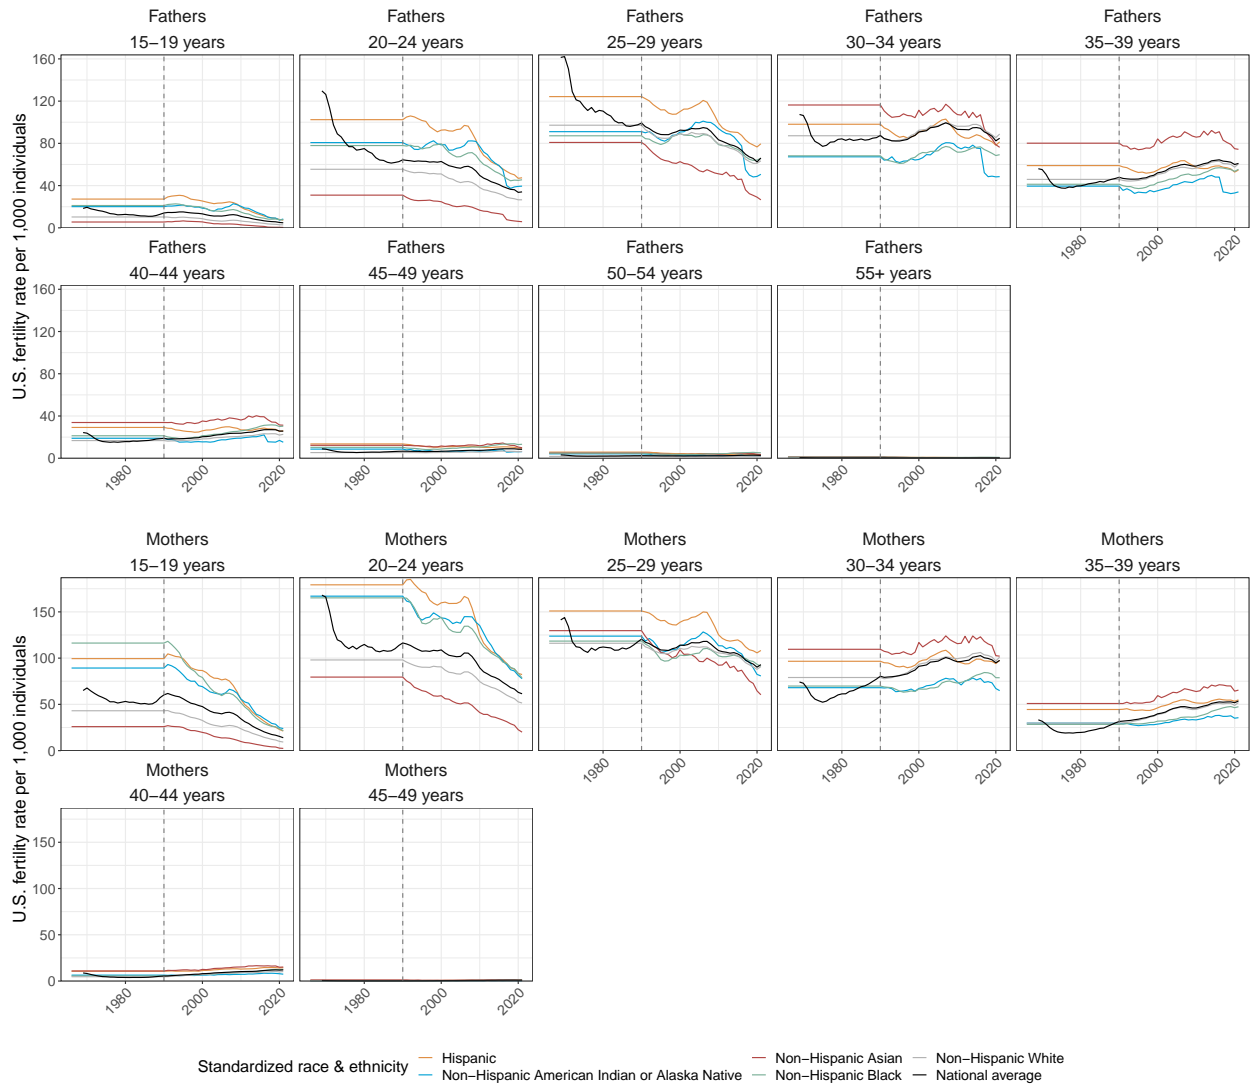

Supplementary Fig. S7: National-level fertility rates per 1,000 population by standardized race & ethnicity in 1990-2021, and assuming constant rates in 1966-1989. For comparison, the black lines show national-level fertility rates, which we calculated directly in 1969-1989 and calculated as weighted average of the standardized race & ethnicity-specific fertility rates in 1990-2021. The dashed vertical line represents 1990, where before 1990 we assumed the same fertility rates in each year in 1966-1989 as in 1990

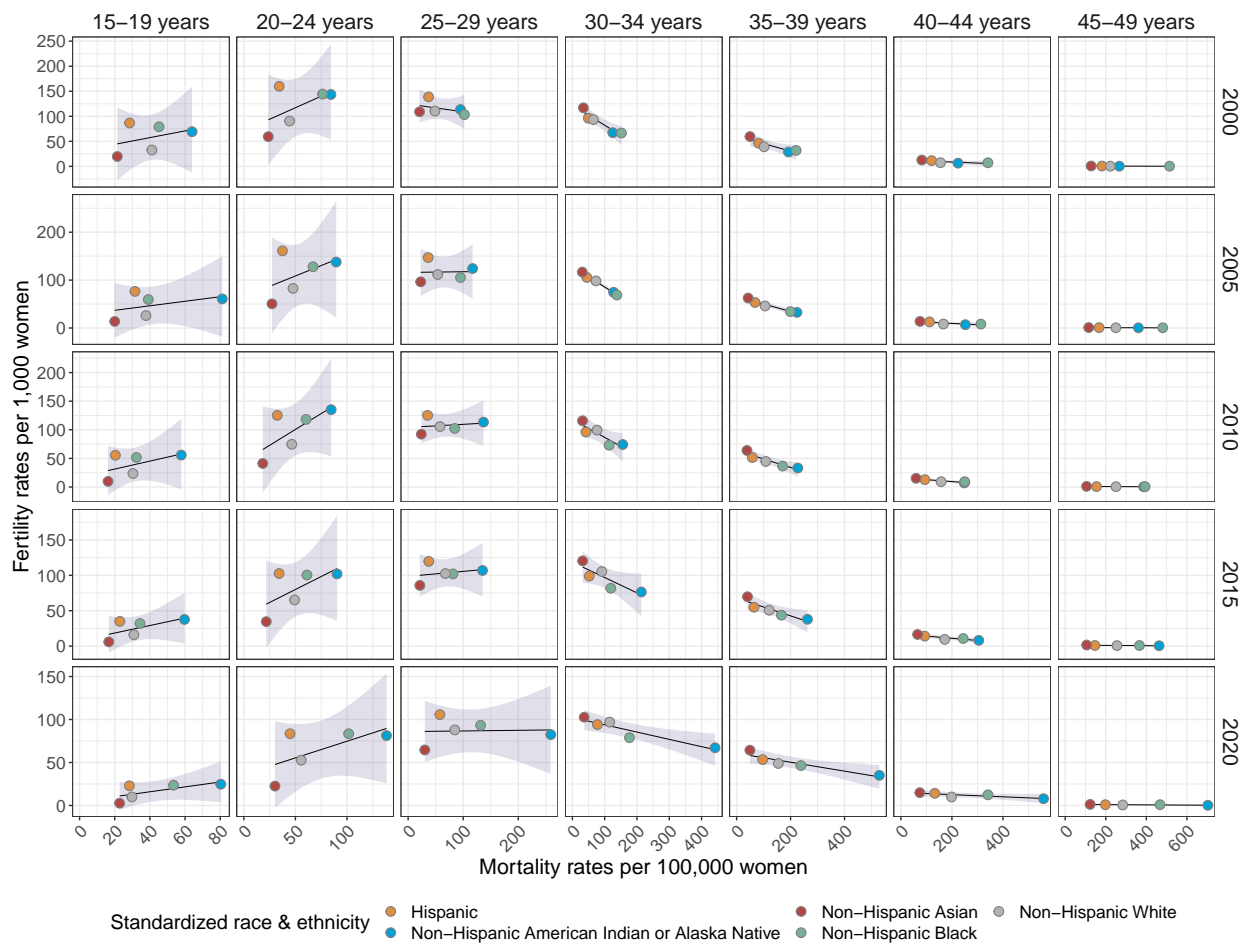

Supplementary Fig. S8: Correlations between standardized race & ethnicity-specific female fertility rates and standardized race & ethnicity-specific female mortality rates by age of mothers and calendar year. Empirical fertility rates are shown as dots, and linear regression fits with 95% prediction intervals are added to visualize correlations.



## 193 S1.5 Estimates of national-level orphanhood, 1983-2021

194 We estimated the number of children who newly experienced orphanhood in year  $y$ ,  $y = 1983, \dots, 2021$ , from  
 195 the population-level mortality records of U.S. residents in year  $y$  and the number of children each decedent  
 196 was expected to leave behind. Our approach follows the methods described in [Hillis et al., 2021a, Unwin  
 197 et al., 2022], with modifications to account for causes-of-death.

198 We obtained the expected number of children per one U.S. resident of age  $a$  years, sex  $s$ , and standardized  
 199 race & ethnicity  $r$  in year  $y$  who are of age  $b = 0, 1, \dots, 17$  years (denoted with  $C_{y,a,g,r,b}$ ) by multiplying the  
 200 corresponding fertility rates of Eq. (1) with pediatric survival probabilities of children born in year  $y - b$  and  
 201 surviving until age  $b + 1$  (denoted with  $p_{y-b,b+1}^{\text{survive}}$ ). Specifically,

$$C_{y,a,s,r,b} = FR_{y-b,a-b,s,r} \times p_{y-b,b+1}^{\text{survive}}, \quad (2)$$

202 where  $y$  ranges from 1983 to 2021, the single year of age of mothers ranges from  $a \in \{15, \dots, 66\}$  years, the  
 203 single year of age of fathers ranges from  $a \in \{15, \dots, 94\}$  years, the standardized race & ethnicity categories  
 204 are as described before, and  $b = 0, 1, \dots, 17$  years. We obtained the pediatric survival probabilities from the  
 205 child mortality data in [United Nations Population Division, 2020] and use in Eq. (2) the fertility rates of the  
 206 age band that includes age  $a - b$ . We then estimated the number of children aged  $b$  who newly experienced in  
 207 year  $y$  the death of a parent  $s$  of age specified in 5-year age bands  $a' \in \mathcal{A} = \{15 - 19, \dots, 80 - 84, 85 + \text{years}\}$ ,  
 208 and standardized race & ethnicity  $r$  who died of caregiver loss cause-of-death  $c$  by

$$O_{y,a',s,r,b,c}^{\text{death-of-parent}} = \left( \sum_{a \in a'} C_{y,a,s,r,b} \right) \times D_{y,a',s,r,c}. \quad (3)$$

209 Due to the correlations between standardized race & ethnicity specific fertility and mortality rates, we  
 210 calculated Eq. (3) for each standardized race & ethnicity. In Eq. (3), we assumed that population-level  
 211 fertility rates are not correlated with population-level mortality rates, which may lead to upwards or  
 212 downwards bias in orphanhood estimates that we explored in several sensitivity analyses (see below). We  
 213 also assumed that parents and their children have the same standardized race & ethnicity.

214 Since orphanhood considers children who experienced the death of their mother, father or both, we are  
 215 interested in the sum of Eq. (3) for both mothers and fathers, but need to subtract children who lost their  
 216 other parent in the previous  $b - 1$  years, or who lost their other parent in the same year  $y$ . Throughout,  
 217 we assumed that the other parent  $1 - s$  is in the same age band  $a'$  and of the same standardized race &  
 218 ethnicity as parent  $s$ . The probability that the other biological parent of the children in Eq. (3) died in the  
 219 same year  $y$  is based on standard life table calculations [Shryock et al., 1975, Lee and Wang, 2003, Arias  
 220 et al., 2022], specifically the probability that an individual of sex  $1 - s$  and standardized race & ethnicity  
 221  $r$  died in year  $y$  between (continuous) age  $a$  and  $a + n$  conditional on survival up to age  $a$ , where  $n = 5$   
 222 corresponds to the width of the 5-year age bands considered. This mortality hazard is approximated using  
 223 midpoints  $x = (a + a + 5)/2$  in each age interval, through

$${}_n h_x = \frac{{}_n f(x)}{S(x)} = \frac{1}{n} \frac{{}_n q_a S(a)}{\frac{1}{2}(S(a) + S(a + n))} = \frac{1}{n} \frac{{}_n q_a S(a)}{\frac{1}{2}(S(a) + (1 - {}_n q_a)S(a))} = \frac{1}{n} \frac{2 {}_n q_a}{2 - {}_n q_a} = \frac{1}{n} \frac{{}_n D_a}{{}_n P_a}, \quad (4)$$

224 where for ease of readability we have suppressed  $y$ ,  $s$  and  $r$ , and  ${}_n P_a$  and  ${}_n D_a$  are respectively the estimated  
 225 population sizes and observed death counts by the end of the corresponding calendar year in each 5-year

226 age band  $a' = [a, a + 5)$ . The intermediate quantities in (4) are the approximated (unknown) mortality  
 227 probability density function  ${}_n f(x)$  at age midpoint  $x$  and (unknown) survival function  $S(a)$  up to age  $a$ ,  
 228 that can be expressed in terms of the age-specific mortality rate  ${}_n q_a$ , the proportion of individuals alive at  
 229 age  $a$  and who die before reaching age  $a + n$  in the corresponding calendar year. It is standard to estimate  
 230  ${}_n q_a$  with  $({}_n D_a)/({}_n P_a + \frac{1}{2} {}_n D_a)$ , from which Eq. (4) follows [Shryock et al., 1975, Lee and Wang, 2003, Arias  
 231 et al., 2022]. Using Eq. (4), we estimated the number of children aged  $b$  who newly experienced in year  $y$   
 232 the death of one parent due to cause-of-death  $c$  and the death of the other parent due to any cause with

$$O_{y,a',s,r,b,c}^{\text{new-double}} = {}_5 h_{y,x,1-s,r} \times \left( \sum_{a \in a'} C_{y,a,s,r,b} \right) \times D_{y,a',s,r,c}, \quad (5)$$

233 where  $x$  is the midpoint age in age band  $a'$ . In Eq. (5), we assumed that deaths among parents occurred  
 234 independently of each other and ignored correlations of deaths among parents by the same cause-of-death  
 235 such as COVID-19 [Hillis et al., 2021a], as well as correlations of deaths among parents who died of different  
 236 causes-of-death. Similarly, we estimated that the number of children aged  $b$  who newly experienced in year  
 237  $y$  the death of one parent  $s$  due to cause-of-death  $c$  and the death of their other parent  $1 - s$  due to any  
 238 cause in any of the previous  $i = 1, \dots, b - 1$  years with

$$O_{y,a',s,r,b,c}^{\text{previous}} = \left( \frac{1}{5} \sum_{x-i \in a'} \sum_{x=1}^{b-1} {}_5 h_{y-i,x-i,1-s,r} \right) \times \left( \sum_{a \in a'} C_{y,a,s,r,b} \right) \times D_{y,a',s,r,c}. \quad (6)$$

With these considerations, we estimated the number of children aged  $b$  who newly experienced orphanhood  
 in year  $y = 1983, \dots, 2021$ , by the death of one or both parents of age  $a'$  and standardized race & ethnicity  
 $r$  who died of cause-of-death  $c$  with

$$O_{y,a',r,b,c}^{\text{new}} = O_{y,a',s,r,b,c}^{\text{death-of-parent}} + O_{y,a',1-s,r,b,c}^{\text{death-of-parent}} \quad (7a)$$

$$- \left( O_{y,a',s,r,b,c}^{\text{new-double}} + O_{y,a',1-s,r,b,c}^{\text{new-double}} \right) / 2 \quad (7b)$$

$$- O_{y,a',s,r,b,c}^{\text{previous}} - O_{y,a',1-s,r,b,c}^{\text{previous}}. \quad (7c)$$

239 Eq. (7b) subtracts the children who lost in year  $y$  a parent due to cause  $c$  and the other parent due to any  
 240 cause, which are counted twice in Eq. (7a). Without line-list family data and working from individual-level  
 241 live birth and death statistics, the two terms  $O_{y,a',s,r,b,c}^{\text{new-double}}$ ,  $O_{y,a',1-s,r,b,c}^{\text{new-double}}$  are not identical and for this reason we  
 242 subtracted the average of both. Eq. (7c) subtracts the children who already lost the other parent in previous  
 243 years. In our previous studies on COVID-19 associated orphanhood, we did not consider the possibility of  
 244 reinfection with COVID-19 and for this reason did not subtract children who already lost the other parent  
 245 due to COVID-19 in previous years in these studies [Hillis et al., 2021a]. Further arguments show that  
 246 across ages, standardized race & ethnic groups, and caregiver loss causes-of-death, the values in Eq. (7b,7c)  
 247 are approximately equal to orphanhood prevalence divided by four, and so do not exceed 1% of the average  
 248 values in Eq. (7a).

249 To estimate the prevalence of orphanhood in year  $y = 2000, \dots, 2021$ , we accrued the number of children  
 250 who newly experienced orphanhood in the previous 17 years and current year  $y$ , while accounting for  
 251 ageing. Specifically, for each calendar year since 2000, we estimated the total number of children aged  
 252  $b = 0, \dots, 17$  years in calendar year  $y$  and of race & ethnicity  $r$  who experienced orphanhood in their lifetime

253 by cause-of-death  $c$  in one or both parents with

$$O_{y,r,b,c}^{\text{lifetime}} = \sum_{i=0}^b \sum_{a'} O_{y-i,a',r,b-i,c}^{\text{new}} \quad (8)$$

254 which sums over children who newly experienced orphanhood at younger ages in previous years.

255 Following Eqs. (7-8), we derived additional key quantities such as the number of children aged  $b$  in calendar  
 256 year  $y = 1983, \dots, 2021$  and standardized race & ethnicity  $r$  who newly experienced orphanhood in year  $y$   
 257 by parental sex  $s$  and cause-of-death  $c$ ,

$$O_{y,s,r,b,c}^{\text{new}} = \sum_{a'} O_{y,a',s,r,b,c}^{\text{death-of-parent}} - O_{y,a',s,r,b,c}^{\text{new-double}} + \left( O_{y,a',s,r,b,c}^{\text{new-double}} + O_{y,a',1-s,r,b,c}^{\text{new-double}} \right) / 4 - O_{y,a',s,r,b,c}^{\text{previous}} \quad (9)$$

258 We chose the specific form of Eq. (9) over simpler approaches to ensure that the sum of  $O_{y,s,r,b,c}^{\text{new}}$  and  
 259  $O_{y,1-s,r,b,c}^{\text{new}}$  equals Eq. 7. Further, we derived the number of children aged  $b$  in calendar year  $y = 2000, \dots, 2021$   
 260 and standardized race & ethnicity  $r$  who experienced orphanhood in their lifetime by parent sex  $s$  and  
 261 cause-of-death  $c$  by

$$O_{y,s,r,b,c}^{\text{lifetime}} = \sum_{i=0}^b O_{y-i,s,r,b-i,c}^{\text{new}} \quad (10)$$

262 and the number of children of standardized race & ethnicity  $r$  who experienced orphanhood in calendar year  
 263  $y = 2000, \dots, 2021$  in their lifetime by cause-of-death  $c$  in one or both parents by

$$O_{y,r,c}^{\text{lifetime}} = \sum_{a'} \sum_{i=0}^{17} \sum_{b=0}^{17-i} O_{y-i,a',r,b,c}^{\text{new}} \quad (11)$$

264 All other total numbers reported in this manuscript are aggregations of Eqs. (7-11).

## 265 **S1.6 Estimates of national-level grandparent caregiver loss, 1983-2021**

266 We estimated the number of children who newly experienced grandparent caregiver death in year  $y$ ,  $y =$   
 267  $1983, \dots, 2021$  from the population-level mortality records in year  $y$  of U.S. residents aged 30 years and  
 268 above (30+), and assuming that each decedent who is estimated to have been a grandparent caregiver leaves  
 269 a minimum of one grandchild behind. Our approach follows the methods described in [Hillis et al., 2021a],  
 270 with modifications to estimate the age of children who experience the death of a grandparent caregiver.

271 Starting from 2010, the American Community Survey (ACS) [Ellis and Simmons, 2014] collects data on  
 272 the total number of adults aged 30+ years living with grandchildren of age 17 or under in the U.S., and  
 273 proportions of these by sex, and separately by bridged-race and Hispanic origin [United States Census bureau,  
 274 2021].

275 For each year  $y = 2010, \dots, 2021$ , we estimated the number of adults aged 30+ years living with grandchildren  
 276 of age 17 or under for each sex and standardized race & ethnicity by multiplying totals and proportions  
 277 made available by the ACS. We then divided these numbers with the respective population size estimates  
 278 to estimate sex- and standardized race & ethnicity-specific proportions of adults aged 30+ years who live  
 279 with their grandchildren of age 17 or under, which we denoted with  $\gamma_{y,s,r}$ . For  $y = 1983, \dots, 2009$ , we  
 280 assumed that  $\gamma_{y,s,r}$  is the same as in 2010. We further assumed that each grandparent caregiver leaves upon

281 death a minimum of one child behind (corresponding to Eq. (2)) and estimated the minimum number of  
 282 grandchildren who newly experienced grandparent caregiver death in year  $y = 1983, \dots, 2021$ , with a U.S.  
 283 resident grandparent caregiver aged 30+ years, sex  $s$  and standardized race & ethnicity category  $r$  who died  
 284 of leading cause  $c$  by

$$G_{y,s,r,c}^{\text{new}} = 1 \times \gamma_{y,s,r} \times \sum_{a' \geq 30} D_{y,a',s,r,c}. \quad (12)$$

285 The ACS surveys did not collect data on whether both grandparents are alive and live with their grandchildren  
 286 of age 17 or under, and for this reason we did not adjust Eq. (12) further for loss of other grandparents. We  
 287 investigated in Sensitivity analyses our assumption that  $\gamma_{y,s,r}$  was approximately constant from 1983 to 2010  
 288 using longitudinal United Nations Population Division data on Households and Living Arrangements of Older  
 289 Persons for the U.S., which suggested that the proportion of older persons who live with children or who  
 290 are the primary caregivers of children has in the U.S. remained fairly constant since 1990 (Supplementary  
 291 Fig. S23).

292 To estimate the minimum number of children who experienced grandparent caregiver death in their lifetime,  
 293 we additionally need disaggregations of Eq. (12) by single year of age  $b = 0, \dots, 17$  years. For the central  
 294 analysis, we assumed that the age composition of  $G_{y,s,r,c}^{\text{new}}$  is the same as the age composition of children who  
 295 lost parents older than 30 years,

$$G_{y,s,r,b,c}^{\text{new}} = G_{y,s,r,c}^{\text{new}} \times \frac{\sum_{a' \geq 30} O_{a',s,r,b,c}^{\text{new}}}{\sum_{b=0}^{17} \sum_{a' \geq 30} O_{a',s,r,b,c}^{\text{new}}}, \quad (13)$$

296 where  $O_{a',s,r,b,c}^{\text{new}}$  are obtained from Eq. (7) by summing over the years  $y = 2000, \dots, 2021$ , and  $c$  is one  
 297 of the leading caregiver loss causes-of-death. Supplementary Fig. S9 shows that the age compositions of  
 298 children who lost parents older than 30 years differ across causes-of-death while they are relatively stable  
 299 across standardized race & ethnicity. It is plausible that the age composition of  $G_{y,s,r,c}^{\text{new}}$  may differ from the  
 300 age composition of children who lost parents older than 30 years, and we explored alternative approaches to  
 301 Eq. (13) in sensitivity analyses; none of these had a considerable impact on our overall estimates.

302 To obtain minimum estimates of caregiver loss, we then summed Eq. (9) and Eq. (13).

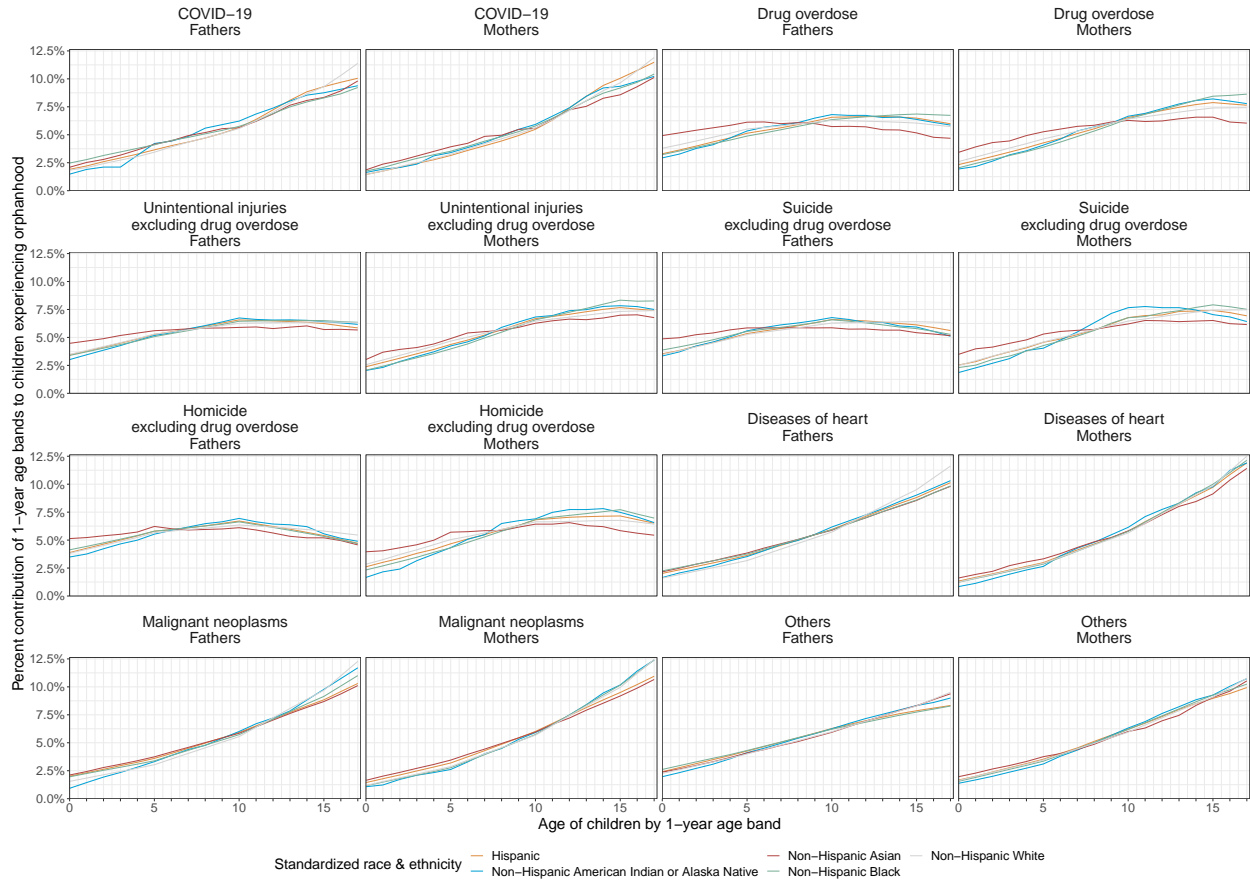

Supplementary Fig. S9: Percent contributions of 1-year age bands to children newly experiencing the loss of parents older than 30 years, stratified by standardized race & ethnicity and leading caregiver loss causes-of-death.

### 303 S1.7 Uncertainty quantification in national estimates

304 This section describes how we derived uncertainty intervals in the national-level estimates of orphanhood  
 305 incidence and prevalence (Eqs. (7)-(11)) and grandparent caregiver loss (Eq. (13)). To capture uncertainty,  
 306 we followed the same phenomenological approach as in Hillis et al. (2021a), and added Poisson noise around  
 307 mortality, natality, and population size data for all year, sex, age, standardized race & ethnicity, and  
 308 cause-of-death strata. We generated 10,000 Poisson noise data sets, and in terms of the uncertainty in  
 309 mortality data, additionally considered uncertainty related to the harmonization of causes-of-death counts  
 310 from 1983-1999 to the ICD-10 classification to avoid discontinuities in orphanhood estimates between 1998  
 311 and 1999. Specifically, we resampled the comparability ratios 10,000 times, assuming these were normally  
 312 distributed with the standard deviations reported in Table 1 of Anderson et al. (2001) where available, and  
 313 multiplied these ratios with the Poisson noise mortality data. Then, we repeated orphanhood incidence and  
 314 prevalence estimates on each data set, and calculated 2.5% and 97.5% quantiles to generate 95% uncertainty  
 315 intervals around central estimates.

316 In the ACS data, we accounted for uncertainty in the estimated number of adults aged 30+ years living  
 317 with grandchildren and in the attribution to sex, and standardized race & ethnicity groups using published

318 uncertainty ranges. The ACS provides for each of their published estimates margins of error that correspond  
319 to 90% confidence intervals. We converted the 90% margins of error into standard deviations and bootstrap  
320 re-sampled the available totals and separate proportions 1,000 times assuming normal distributions around  
321 their central estimates and the corresponding standard deviations, multiplied the bootstrap resampled totals  
322 and proportions, and then divided by the corresponding population sizes. Across years, we found these  
323 sources of uncertainty amounted on average to 95% bootstrap intervals on the order of  $\pm 0.79\%$  of the  
324 central estimate of the number of Hispanic women aged 30+ years who live with grandchildren,  $\pm 8.23\%$   
325 among Non-Hispanic American Indian or Alaska Native women,  $\pm 1.93\%$  among Non-Hispanic Asian women,  
326  $\pm 0.97\%$  among Non-Hispanic Black women and  $\pm 0.69\%$  among Non-Hispanic White women; and similarly  
327 for men. We similarly generated 10,000 resampled data sets, repeated grandparent caregiver loss incidence  
328 and prevalence estimates on each data set, and then calculated 2.5% and 97.5% quantiles to generate 95%  
329 uncertainty intervals around central estimates.

### 330 **S1.8 Estimates of state-level orphanhood, 2021**

331 To guide policy at the state level, we further estimated orphanhood and grandparent caregiver loss in each  
332 of the 50 U.S. states and District of Columbia. We focussed on estimating the number of children who  
333 newly experienced orphanhood (incidence) and the number of children who experienced orphanhood in their  
334 lifetime (prevalence) in each state in 2021, by the leading caregiver loss causes-of-death (see Supplementary  
335 Table S9). To obtain state-level orphanhood prevalence estimates for 2021, as before we had to accrue  
336 and age state-level orphanhood incidence estimates from 2004, and to obtain state-level fertility rates from  
337 1987. Overall, we proceeded analogously as for the national estimations, but obtained data from CDC  
338 WONDER (CDC, 2023) as state-level mortality data were not publicly available from NCHS from 2005  
339 onwards (National Center for Health Statistics, 2023). Counts below 10 were suppressed in CDC WONDER  
340 and for this reason we performed all estimations without stratification by standardized race & ethnicity. We  
341 adjusted for data suppression, and known biases in this approach that are due to correlations in mortality  
342 and fertility rates across standardized race & ethnicity. We note these are modelled adjustments and we  
343 cannot exclude that this resulted in bias in state-specific orphanhood estimates.

We extracted annual death counts by state, sex, age bands (15 – 19 years, ..., 95 – 99 years, > 100 years), and cause-of-death (ICD-10 113 Selected Causes of Death) from the CDC WONDER mortality portal (CDC, 2023) from 2005 to 2021; and combined these data with the previously described, cause-specific NCHS mortality data sets from 2004 for which information on the state of residence of the decedent was publicly available. Throughout, we focused only on the eight leading caregiver-loss causes of death chronic liver disease and cirrhosis, COVID-19, diseases of the heart, drug overdose, homicide excluding drug overdose, malignant neoplasms, suicide excluding drug overdose, and unintentional injuries excluding drug overdose. For the leading caregiver-loss causes of death, the average discrepancy in the state-, sex-, age-, and cause-of-death-specific data from CDC WONDER was, when aggregated to national-level and compared to the corresponding NCHS mortality data, 22.9% among women and 13.5% among men. As a first step, we imputed suppressed entries with a value of 2, which resulted in average discrepancies of 6.80% among women and 2.53% among men. To account for these discrepancies, as a second step, we adjusted the state-level

mortality counts according to

$$D_{y,a',s,l,c}^* = \eta_{y,a',s,c} \times D_{y,a',s,l,c} \quad (14a)$$

$$\eta_{y,a',s,c} = D_{y,a',s,c} / \sum_l D_{y,a',s,l,c}, \quad (14b)$$

where  $y$  in 2005 to 2021,  $a'$  denotes the age band of the parent,  $s$  the sex of the parent and  $c$  the leading caregiver loss cause-of-death of the parent, and  $D_{y,a',s,c}$  are the national-level deaths derived from the line-list NCHS data in Eq. (3), and  $D_{y,a',s,l,c}$  are the state-specific deaths derived from CDC WONDER for each of the 50 U.S. states and District of Columbia, indexed by  $l$ . The suppression adjusted, cause-specific, state-level mortality counts matched the cause-specific, national-level mortality counts well, except when all deaths  $D_{y,a',s,c,l}$  were entirely suppressed across all states, which was the case for deaths due to homicide in women aged 55 years or older (Supplementary Fig. S10 compare pink versus blue). Overall, these suppression adjustments did not noticeably change the contribution of causes-of-death to mortality, because the majority of death counts were not suppressed when the data were aggregated to leading caregiver loss causes-of-death (Supplementary Fig. S11).

We next extracted live birth counts for mothers by state and age bands (15 – 19, . . . , 44 – 49 years) from the CDC WONDER natality portal [CDC WONDER, 2022] from 2005 to 2021; and combined these data with the previously described NCHS live birth data sets from 1987 to 2004 for which information on the state of residence of mothers was available. We proceeded analogously for fathers using the age bands 15 – 19, . . . , 44 – 49, 50 – 54, 55+ years from 2016 to 2021, as natality records were not available by demographic characteristics of fathers from 2005 to 2015. Data suppression was not an issue for the stratifications required to estimate orphanhood: for the years 2005-2021, the average discrepancy in the CDC WONDER and NCHS natality data sets was 0.026% for mothers and 0.032% for fathers (as compared to male NCHS live birth data with ages up to 77 years). To compute fertility rates at the state level, we further extracted age- and sex-stratified annual population size estimates for each state from 1987 to 1989 from the NIH National Cancer Institute Surveillance, Epidemiology, and End Results (SEER) database [National Cancer Institute 2023]; and CDC WONDER from 1990 to 2021 [CDC, 2021c, 2022]. State-level fertility rates were calculated as in Eq. (1) when live births counts were available, but without stratification by race & ethnicity. For mothers, live birth counts were not publicly available for women aged 44-49 years in several years and 8 states (Alaska, Delaware, Montana, North Dakota, South Dakota, Vermont, West Virginia and Wyoming), and in these cases we interpolated state-specific fertility rates with locally estimated scatterplot smoothing (LOESS) as implemented in the R `stat` package version 4.2.3 with span argument 0.85. For Wyoming, no data were publicly available after 2019 and so interpolation was not possible and we used 2019 values. For fathers, live births counts were not publicly available from 2005 to 2015, and for these years we estimated state-specific fertility rates with LOESS with span argument 0.85, and using NCHS data from 2000 to 2004 and CDC WONDER data from 2016 to 2020 (Supplementary Fig. S12).

We then estimated state-specific incidence and prevalence of orphanhood from the suppression-adjusted state-level, cause-specific mortality counts and partially imputed fertility rates as outlined in Eqs. (7-11), with one modification. As described above the state-level mortality and fertility data were not disaggregated by race & ethnicity. To account for potential bias arising from correlations in mortality and fertility rates across race & ethnicity, we compared the national-level estimates of the number of children who newly

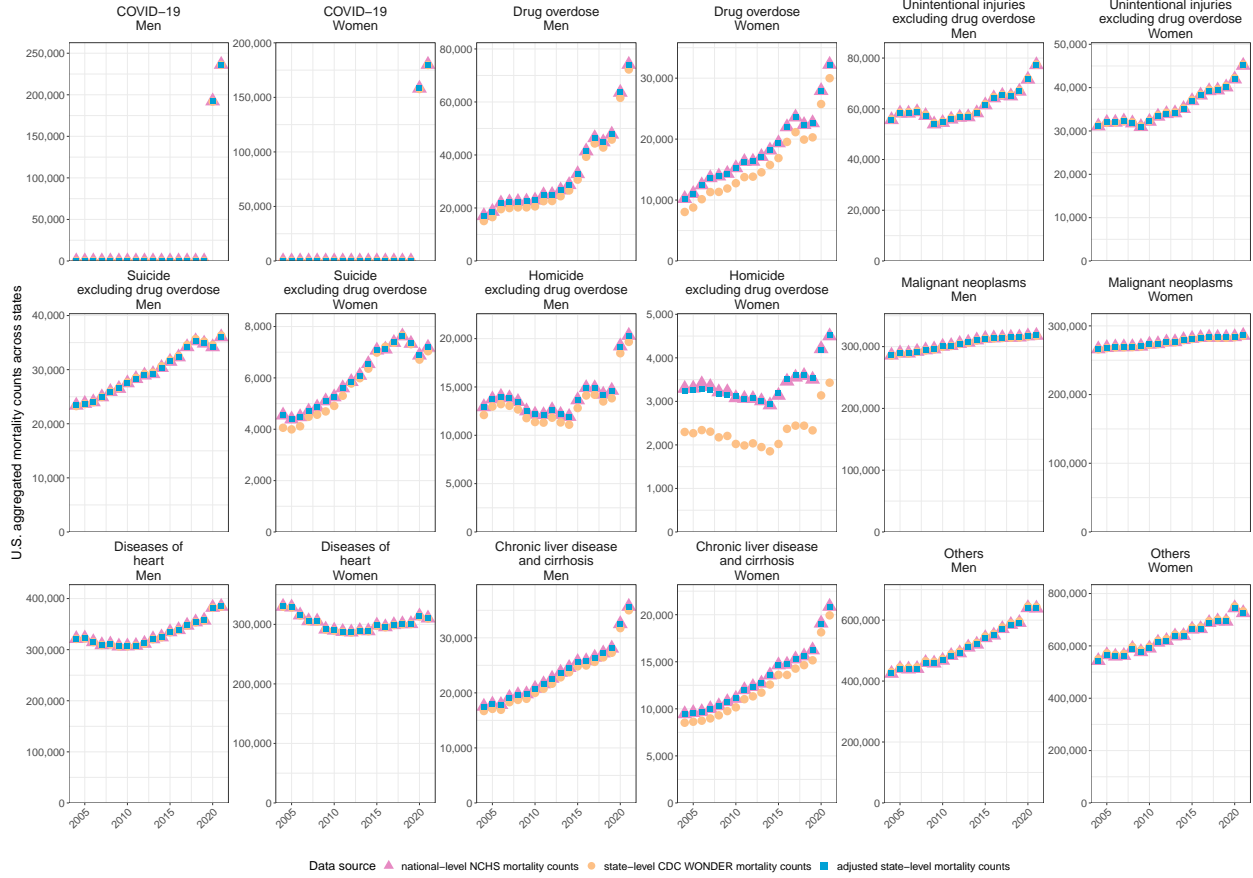

Supplementary Fig. S10: Completeness of state-level mortality counts. State-level mortality counts were extracted from CDC WONDER by year, sex, age band, and cause-of-death; and subject to suppression of counts below 10 individuals. Counts were aggregated to national level to assess their completeness as described in the Supplementary Text. Shown are the cause-specific, state-level mortality counts extracted CDC WONDER, the suppression-adjusted, cause-specific, state-level counts, and for comparison the cause-specific, national-level mortality counts obtained from NCHS.

380 experienced orphanhood in (9) to the state-specific estimates with the correction factors

$$\nu_{y,s,c} = \sum_{r,a',b} O_{y,a',s,r,b,c}^{\text{new}} / \sum_{l,a',b} O_{y,a',s,l,b,c}^{\text{new}} \quad (15)$$

381 Overall, the correction factors  $\nu_{y,s,c}$  tended to be close to one, except for Homicide excluding drug overdose  
 382 in women and ‘Other’ caregiver loss causes-of-death (Supplementary Fig. S13). We then adjusted the  
 383 state-specific estimates as follows,

$$O_{y,a',s,l,b,c}^{\text{new}*} = \nu_{y,s,c} \times O_{y,a',s,l,b,c}^{\text{new}} \quad (16)$$

384 and used Eq. (16) to calculate the state-specific analogues to Eqs. (8|11).

385 We estimated the number of children who newly experienced grandparent caregiver death in year  $y$ ,  $y =$   
 386 2004, ..., 2021 from the state-level mortality records in year  $y$  of U.S. residents aged 30 years and above  
 387 (30+), and assuming that each decedent who is estimated to have been a grandparent caregiver in each state



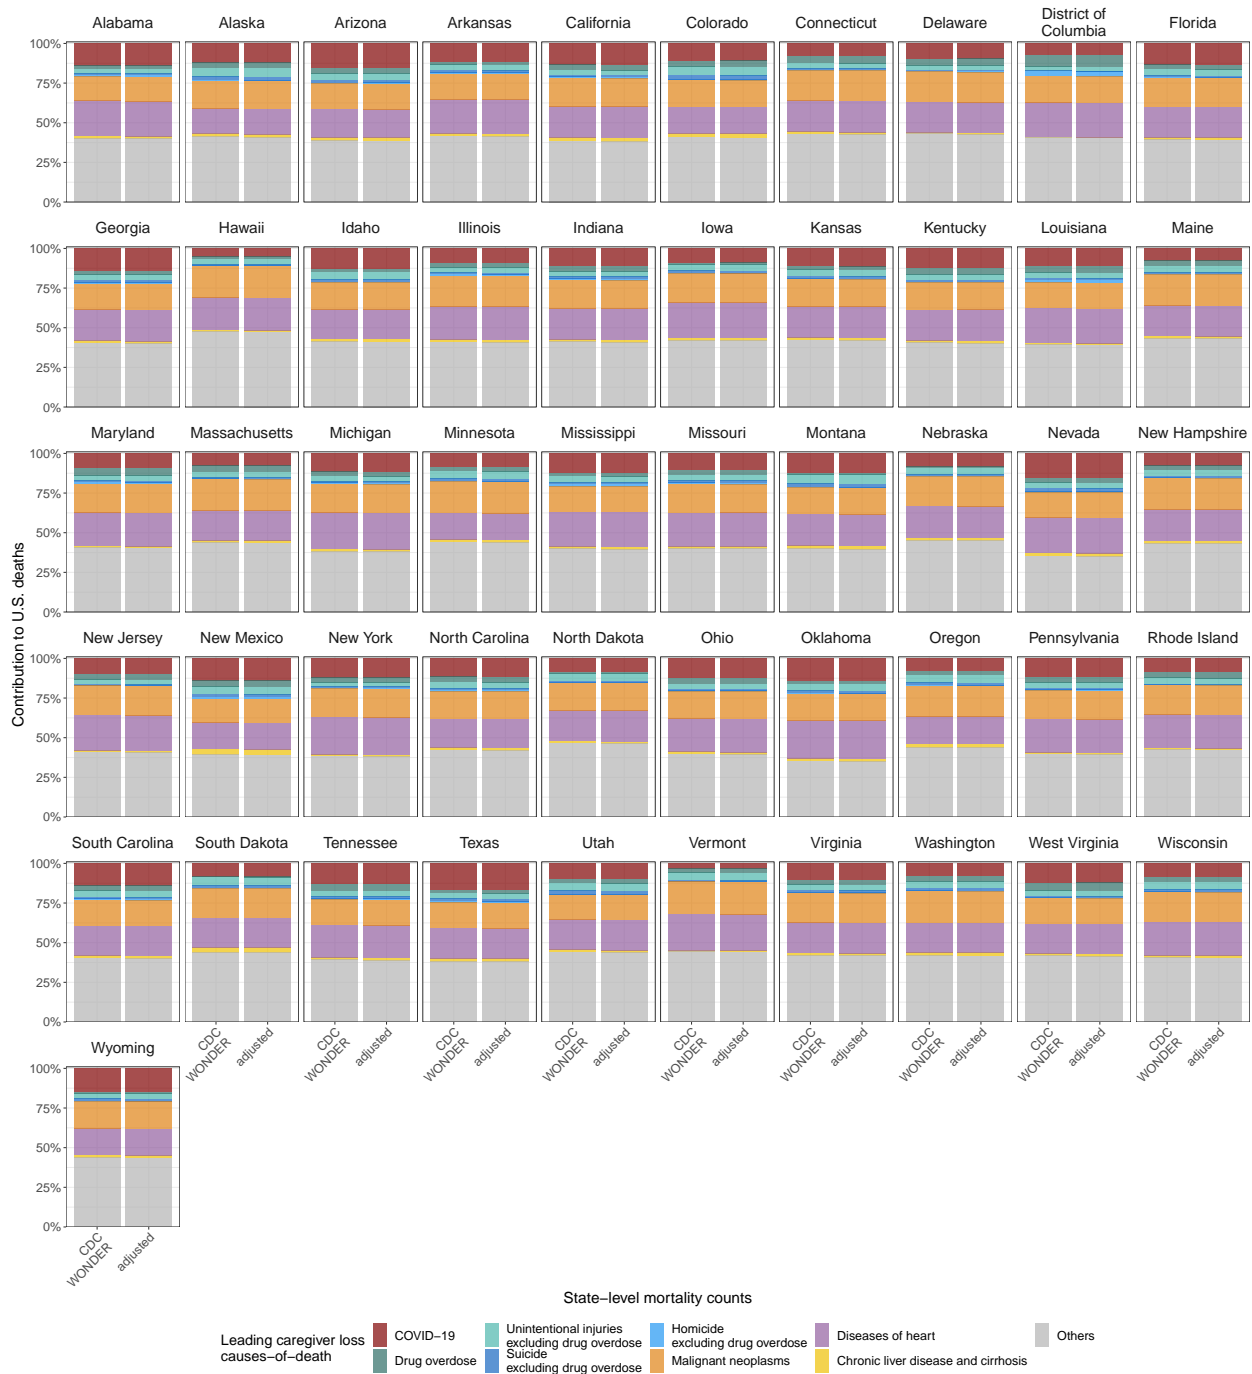

Supplementary Fig. S11: Contribution of leading causes-of-death to U.S. deaths by states. State-level mortality counts were extracted from CDC WONDER by year, sex, age band, and cause-of-death and adjusted for suppression. Shown are the contributions of leading causes-of-death to the unadjusted state-specific deaths in 2021, and the adjusted state-specific deaths in 2021.

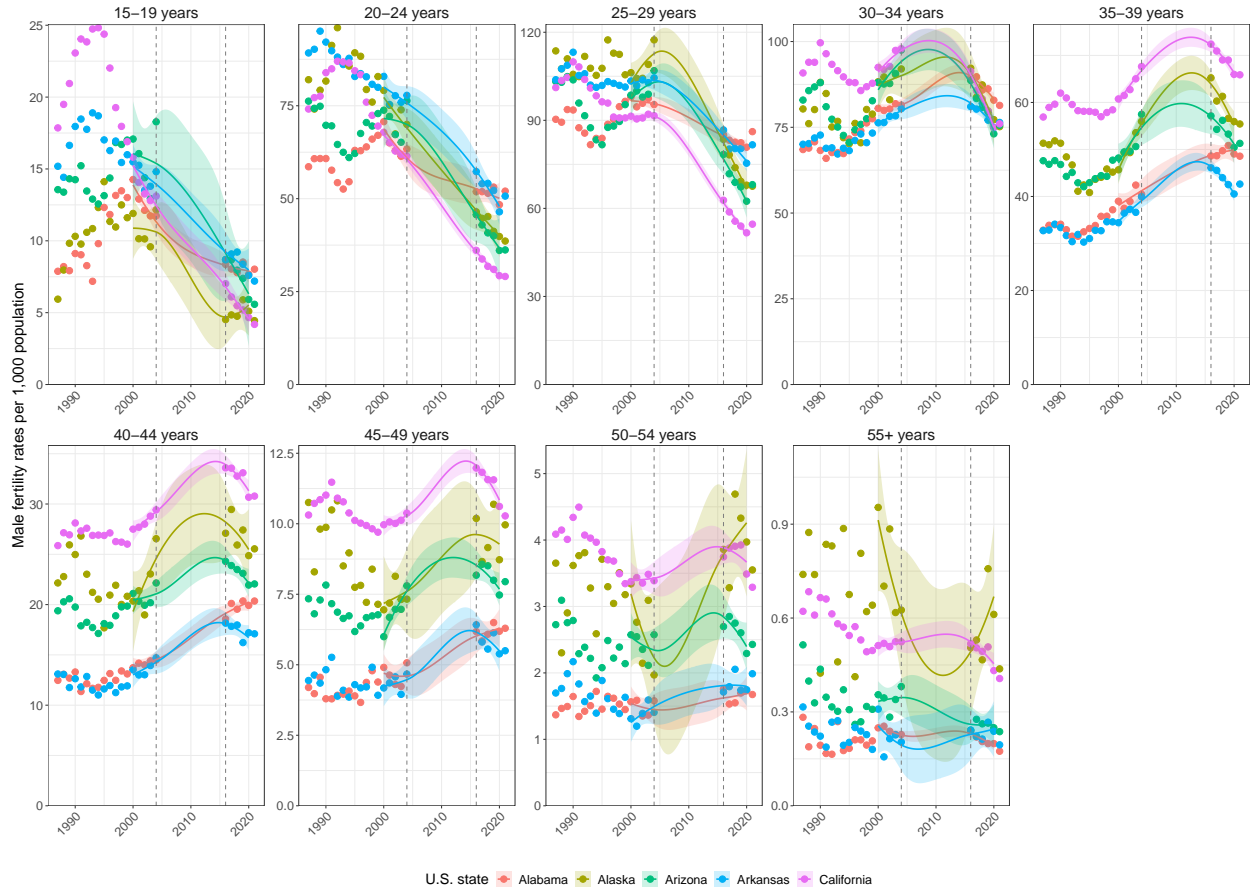

Supplementary Fig. S12: Interpolation of missing state-specific male fertility rates. State-level live birth counts were extracted from CDC WONDER by year, sex, and age band; and combined with line-list NCHS live birth data up to 2004 when information on state residence was made available. For fathers, demographic information was only available since 2016 in CDC WONDER and state-specific male fertility rates were interpolated with LOESS estimators as described in the Supplementary Text. Shown are empirical male fertility rates (dots) for 5 states from 1987 to 2004 and from 2016 to 2021, along with the LOESS estimates (lines) for 2000 to 2020 and 95% prediction intervals (ribbon).

388 leaves a minimum of one grandchild behind. Overall, we proceeded as for the national-level estimation of  
 389 grandparent caregiver loss as ACS also published state-specific data on adults aged 30+ years who live with  
 390 grandchildren of age 17 or under [United States Census bureau 2021]. For each year  $y = 2010, \dots, 2021$ ,  
 391 we calculated the expected number of adults aged 30+ years who live with their grandchildren of age 17 or  
 392 under by multiplying the corresponding total co-resident numbers with the sex-specific proportions for each  
 393 state; and then divided these with corresponding population sizes to obtain the corresponding proportions  
 394  $\gamma_{y,s,l}$ . Overall, these proportions were considerably more uncertain than in the national-level analysis due to  
 395 smaller ACS sample sizes (see below). For  $y = 2004, \dots, 2009$ , we assumed that  $\gamma_{y,s,l}$  is the same as in 2010.  
 396 We further assumed that each grandparent caregiver leaves upon death a minimum of one child behind  
 397 (corresponding to Eq. (2)) and estimated the minimum number of grandchildren who newly experienced  
 398 grandparent caregiver death in year  $y = 2004, \dots, 2021$ , with a U.S. resident grandparent caregiver aged

399 30+ years, sex  $s$  and state category  $l$  who died of leading caregiver loss cause-of-death  $c$  by

$$G_{y,s,l,c}^{\text{new}} = 1 \times \gamma_{y,s,l} \times \sum_{a' \geq 30} D_{y,a',s,l,c}. \quad (17)$$

400 To estimate the minimum number of children who experienced grandparent caregiver death in their lifetime  
 401 in each state, we additionally need disaggregations of Eq. (17) by single year of age  $b = 0, \dots, 17$  years. For  
 402 the central analysis, we assumed that the age composition of  $G_{y,s,l,c}^{\text{new}}$  is the same as the age composition of  
 403 children who lost parents older than 30 years in the same state,

$$G_{y,s,l,b,c}^{\text{new}} = G_{y,s,l,c}^{\text{new}} \times \frac{\sum_{a' \geq 30} O_{a',s,l,b,c}^{\text{new}}}{\sum_{b=0}^{17} \sum_{a' \geq 30} O_{a',s,l,b,c}^{\text{new}}}, \quad (18)$$

404 where  $O_{a',s,l,b,c}^{\text{new}}$  are obtained from Eq. (16) by summing over the years  $y = 2004, \dots, 2021$ , and  $c$  is one of the  
 405 leading caregiver loss causes-of-death. Supplementary Fig. S14 shows that the age compositions of children  
 406 who lost parents older than 30 years differed across causes-of-death while they are relatively stable across  
 407 states.

## 408 S1.9 Uncertainty quantification in state-level estimates

409 This section describes how we derived uncertainty intervals in the state-level estimates of orphanhood  
 410 incidence and prevalence (Eqs. (7-11)) and grandparent caregiver loss (Eq. (13)). Overall, the approach  
 411 here is similar to the national-level uncertainty analysis.

412 We added Poisson noise around state-specific mortality, natality, and population size data for all year, sex,  
 413 age, and cause-of-death strata. We generated 10,000 Poisson noise data sets, repeated orphanhood incidence  
 414 and prevalence estimates on each data set, and then calculated 2.5% and 97.5% quantiles to generate 95%  
 415 uncertainty intervals around central estimates.

416 To estimate grandparent caregiver loss, we accounted for uncertainty in the estimated number of adults aged  
 417 30+ years living with grandchildren by U.S. state using published uncertainty ranges. The ACS provides  
 418 for each of their state-specific estimates margins of error that correspond to 90% confidence intervals. We  
 419 converted the 90% margins of error into standard deviations and bootstrap re-sampled the available totals  
 420 and separate proportions 10,000 times assuming normal distributions around their central estimates and the  
 421 corresponding standard deviations, and then multiplied the sampled totals and proportions. As expected  
 422 given available ACS sample sizes, across years we found that uncertainty in the proportions  $\gamma_{y,s,l}$  was in  
 423 some states considerably larger than for the national race & ethnicity-specific analysis, with 95% bootstrap  
 424 intervals of up to  $\pm 13.5\%$  of the central estimates (Supplementary Fig. S15). We similarly generated 10,000  
 425 resampled data sets, repeated grandparent caregiver loss incidence and prevalence estimates on each data  
 426 set, and then calculated 2.5% and 97.5% quantiles to generate 95% uncertainty intervals around central  
 427 estimates.

## S1.10 Estimates of racial & ethnic groups impacted by leading causes of caregiver loss in U.S. states, 2021

Characterizing the racial & ethnic groups of children that are impacted by orphanhood and grandparent caregiver loss at state-level is challenging due to limits in publicly available data. We focused on estimating and comparing 2021 orphanhood and grandparent caregiver loss prevalence rates by standardized race & ethnicity in the 10 U.S. states with highest orphanhood prevalence rates and for the primary (first-ranked) caregiver-loss cause-of-death only, West Virginia ('Drug overdose'), New Mexico ('Drug overdose'), Mississippi ('Unintentional injuries'), Louisiana ('Drug overdose'), Kentucky ('Drug overdose'), Tennessee ('Drug overdose'), Alabama ('Diseases of heart'), Oklahoma ('Unintentional injuries excluding drug overdose'), Ohio ('Drug overdose') and Florida ('Drug overdose'). Throughout, we obtained publicly available data from CDC WONDER [CDC, 2023] from 2005 onwards [National Center for Health Statistics, 2023] and adjusted for data suppression, but note these are modelled adjustments and we cannot exclude that this resulted in bias in state-specific orphanhood estimates.

Annualized live birth counts were extracted as described for the state-level analysis for 2005 to 2019, but now also stratified by bridged-race and Hispanic origins, and then combined with NCHS live births data from 1987 to 2004. For 2020-2021, live birth counts to women were not available by bridged-race at state-level. Analogously, annual death counts for the leading caregiver loss causes-of-death were compiled as described above for 2005 to 2021, and stratified into the standardized race & ethnicity categories in Supplementary Table S7 and then combined with the NCHS mortality data sets from 2004. Suppressed values were imputed by 1 and adjusted further for suppression as in Eq. (14). We followed previous criteria on data reliability and excluded from consideration for each state those race & ethnicity groups that had more than two age bands with fewer than 20 live birth counts [Mathews and Hamilton 2019]. Supplementary Table S6 lists the corresponding strata as 'small populations', and also describes the average completeness of live birth records for the years 1995-2004 when directly comparable line-list live birth records were also available from NCHS. For the remaining year-state-sex-race & ethnicity strata, we considered the corresponding mortality data for the leading caregiver-loss cause-of-death. Again, we excluded from consideration those standardized race & ethnicity groups that had more than two age bands with fewer than 20 death counts [Mathews and Hamilton 2019]. Supplementary Table S6 lists the corresponding strata as 'small death counts', and also describes the average completeness of death records for the years 1999-2004 when directly comparable line-list death records were also available from NCHS. Supplementary Fig. S16 illustrates the state and standardized race & ethnicity specific live birth data from CDC WONDER, the line-list live birth data from NCHS and the state and standardized race & ethnicity specific live birth data for the three states with highest orphanhood prevalence rates in 2021. Similarly, Supplementary Fig. S17 illustrates the state and standardized race & ethnicity specific mortality data from CDC WONDER for the primary caregiver loss cause-of-death, the line-list live death from NCHS and the adjusted state and standardized race & ethnicity specific mortality data for the three states with highest orphanhood prevalence rates in 2021. Population-size estimates for each state were obtained from the CDC WONDER population size portal for 1990 to 2021 [CDC, 2021c, 2022] by bridged-race, and converted to the standardized race & ethnicity categories described in Supplementary Table S11.

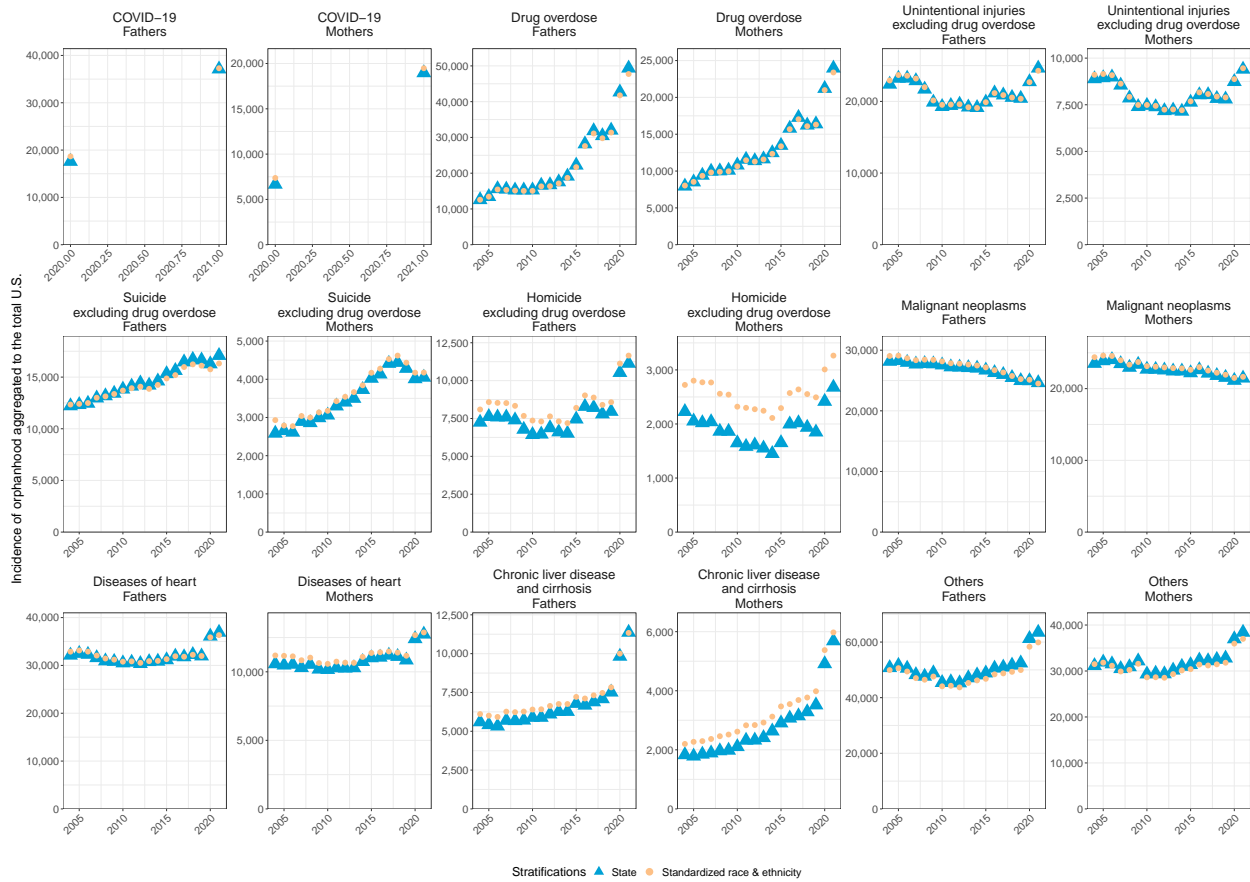

Supplementary Fig. S13: Comparison of estimated national-level incidence of orphanhood and estimated state-level incidence of orphanhood. At the national level, incidence of orphanhood was estimated from line-list live birth and death data stratified by race & ethnicity; whereas as the state-level, incidence of orphanhood was estimated from aggregated and partially interpolated live birth data and partially suppressed cause-specific deaths that were not stratified by race & ethnicity. Shown are incidence estimates using either approach by leading caregiver loss causes-of-death. Overall, incidence estimates were very similar except for ‘Homicide excluding drug overdose’ in women, ‘Chronic liver disease and cirrhosis’ in women and ‘Others’ causes-of-death. State-level incidence estimates were adjusted to match the national-level totals as described in the Supplementary Text.

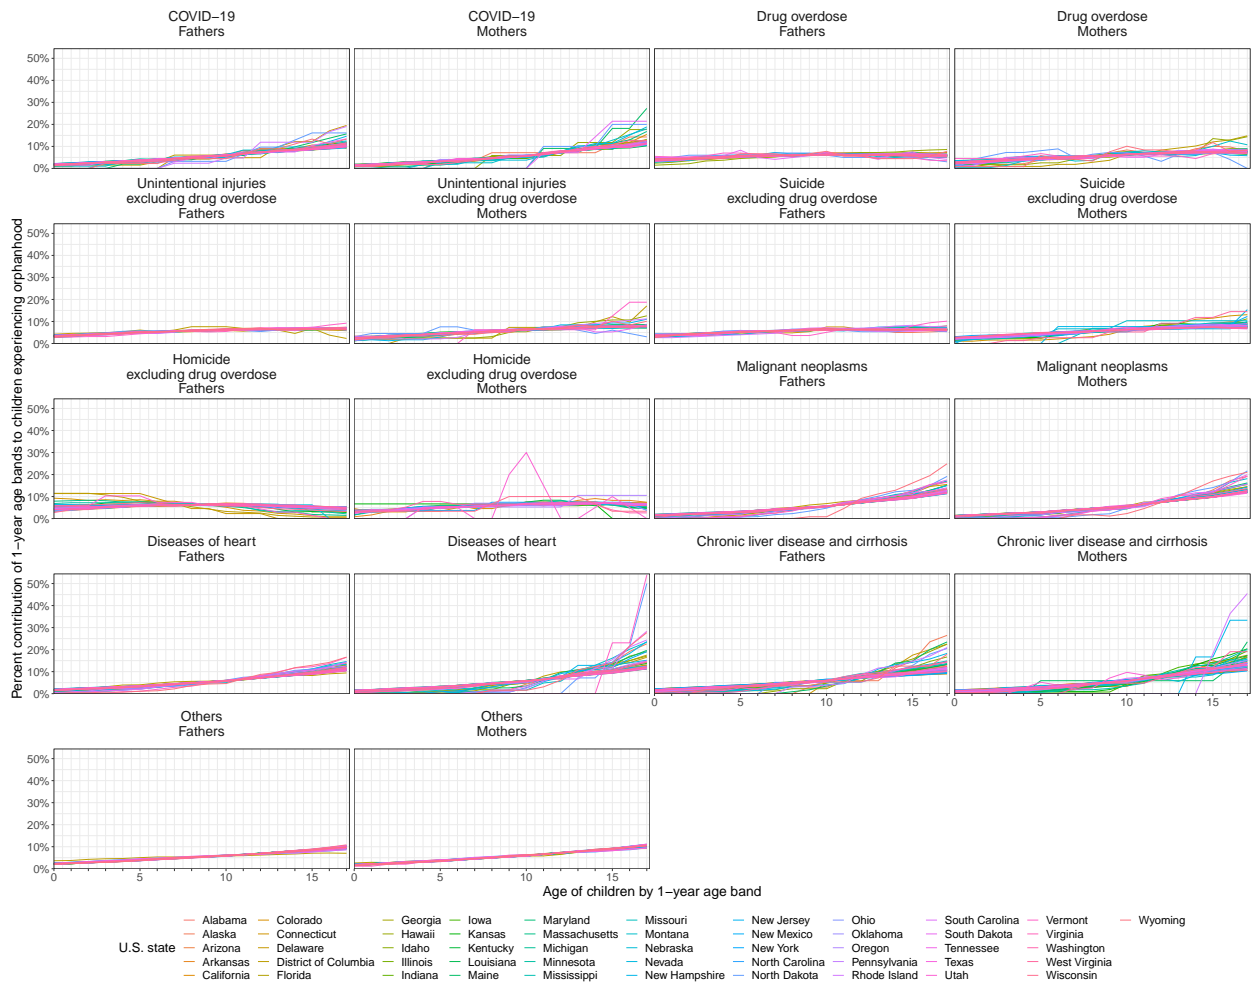

Supplementary Fig. S14: State-specific percent contributions of 1-year age bands to children newly experiencing the loss of parents older than 30 years. Percent contributions were stratified by sex and leading caregiver loss causes-of-death of parents (facets) and are shown for each U.S. state (colours).

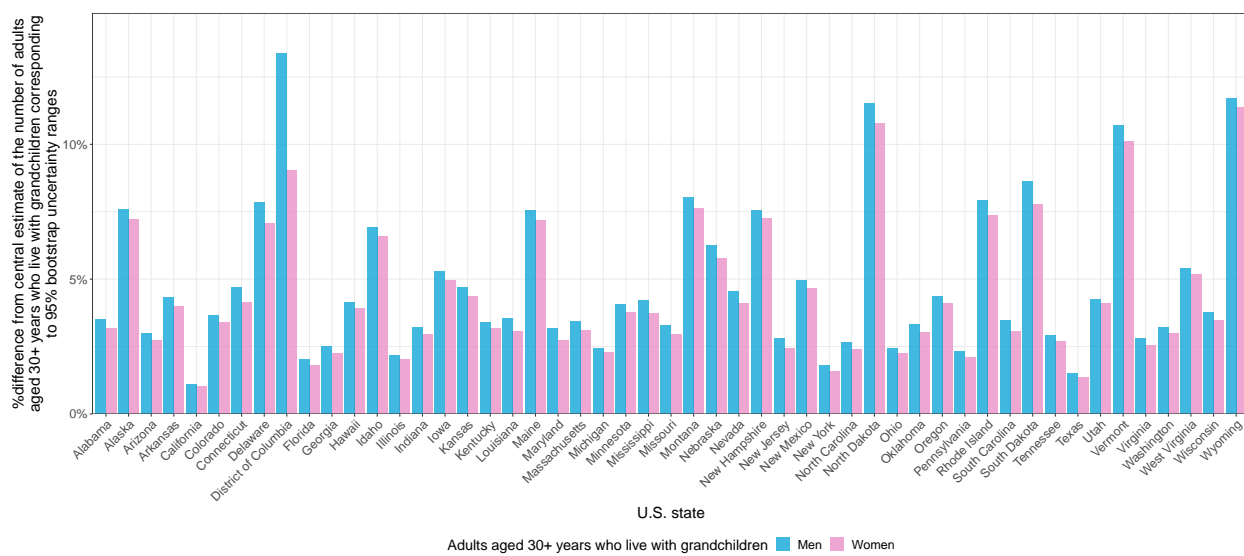

Supplementary Fig. S15: Magnitude of uncertainty in the number of adults aged 30+ who live with grandchildren in each U.S. state. Estimates of uncertainty were derived using bootstrap resampling from the margins of error reported by ACS for each of their estimates. Uncertainty for women and men is shown separately in colour.





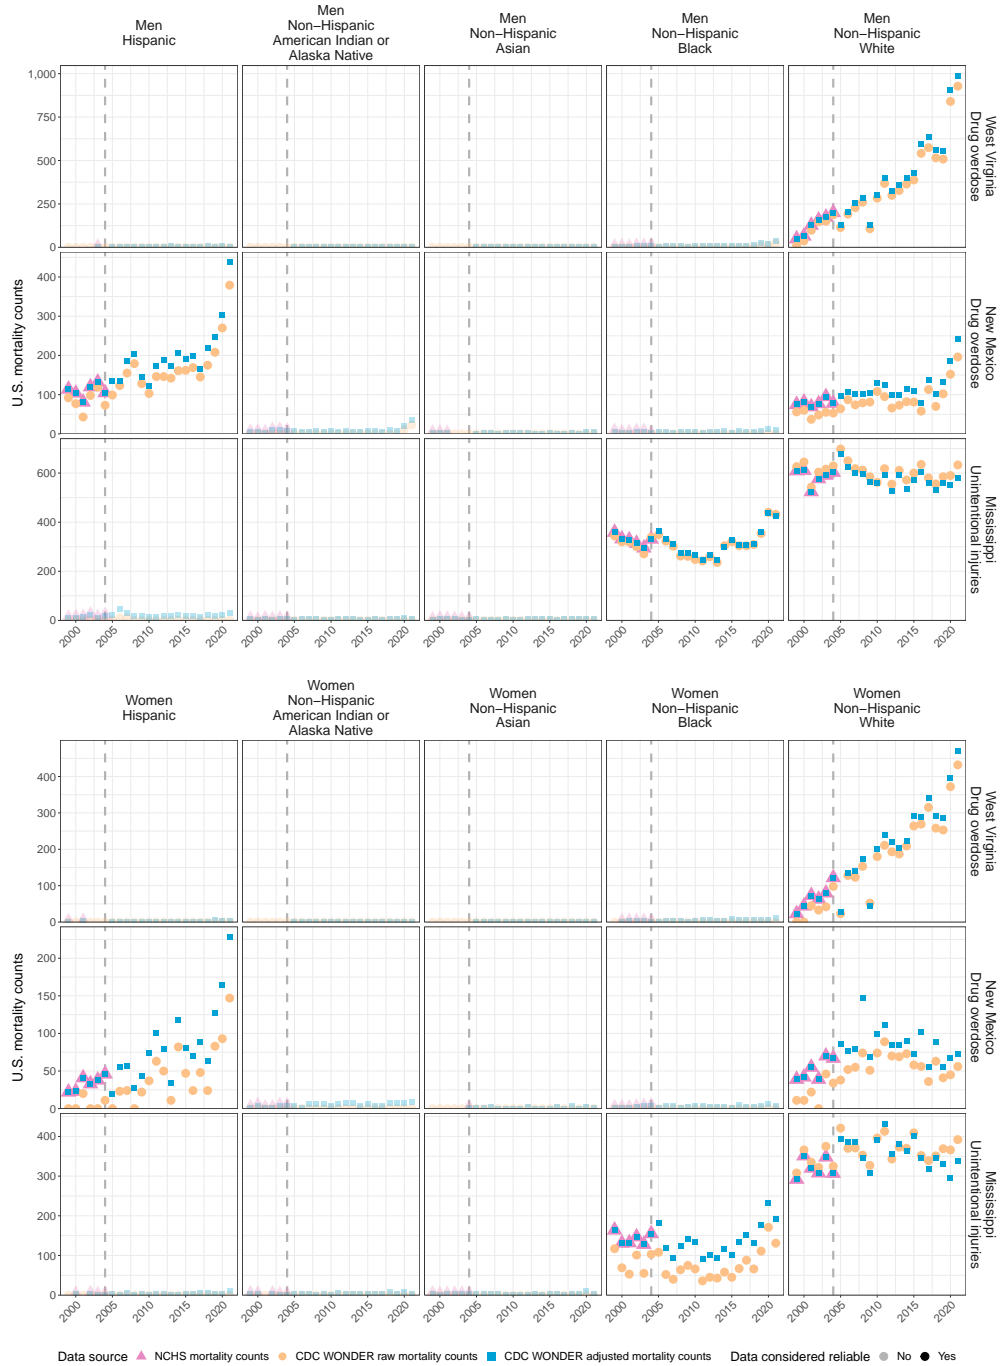

Supplementary Fig. S17: Data completeness evaluation for race & ethnicity- and state-specific mortality counts for three U.S. states, West Virginia, New Mexico and Mississippi. Standardized race & ethnicity-specific mortality counts were extracted from CDC WONDER by state, year, sex, age band, and leading caregiver loss cause-of-death; and subject to suppression of counts below 10 individuals. Counts were aggregated to state-level by standardized race & ethnicity to assess their completeness as described in the Supplementary Text. Shown are the mortality counts extracted from CDC WONDER, the suppression-adjusted, race & ethnicity-specific counts, and for comparison the mortality counts obtained from NCHS by the same stratification. Points shown in opaque colours represent standardized race & ethnicity categories that were excluded from further analysis due to the extent of suppressed data.

467 We estimated race & ethnicity- and state-specific incidence and prevalence of orphanhood as outlined in  
468 Eqs. (7-11), except that female race & ethnicity- and state-specific fertility rates in 2020-2021 were as  
469 assumed to be as in 2019 due to limitations in publicly available data. To investigate estimation accuracy,  
470 we compared the resulting sum of the race & ethnicity- and state-specific orphanhood incidence estimates  
471 to the previous state-specific orphanhood incidence estimates (Supplementary Fig. S18). For Alaska and  
472 Oklahoma, the sum of the race & ethnicity- and state-specific orphanhood incidence estimates was more  
473 than 20% below the state-specific orphanhood incidence estimates attributable to the leading caregiver loss  
474 cause-of-death. Supplementary Table S6 lists these states as 'large discrepancy in estimates'. The table  
475 then reports, for all remaining states, 2021 race & ethnicity- and state-specific orphanhood prevalence rate  
476 estimates that are attributable to the leading caregiver loss cause-of-death.

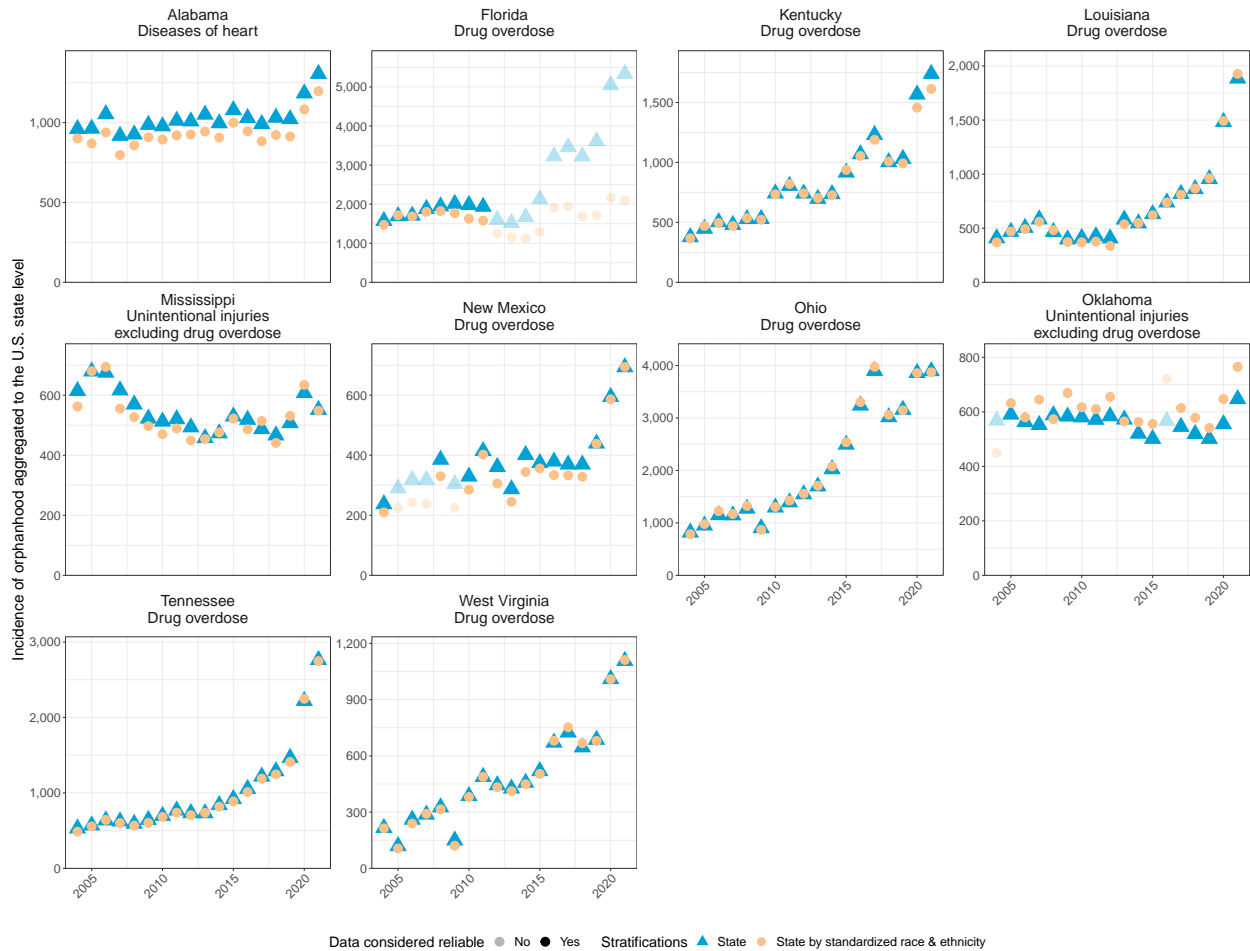

Supplementary Fig. S18: Reliability evaluation of orphanhood incidence estimates by state, year, standardized race & ethnicity and leading caregiver loss cause-of-death. Race & ethnicity- and state-specific orphanhood incidence rates for the leading caregiver loss cause-of-death were estimated from suppression-adjusted live births and deaths counts from CDC WONDER as described in the Supplementary Text. To assess the reliability of these estimates, we considered weighted averages of the orphanhood incidence estimates across race & ethnicity (yellow triangles), and then compared the weighted averages against state-level estimates (blue circles). Triangles and circles are shown in opaque colour when race & ethnicity-specific estimates disagreed by more than 20% and were considered unreliable.

## 477 S2 Sensitivity analyses

478 **Sensitivity in mortality data.** In the central analysis, we derived mortality counts by year, sex, age  
479 band, standardized race & ethnicity and caregiver loss causes-of-death from NCHS line-list mortality records  
480 from 1983 to 2021. Aggregate mortality counts are also available from CDC WONDER [CDC](#) [2023](#) from  
481 1999 to 2021. We extracted data from the NCHS Vital Statistics portal because this allowed us to use the  
482 same data source across all years, bypass data suppression, and incorporate uncertainties in standardized  
483 race & ethnicity reporting. The CDC WONDER mortality counts allowed us to check our in-house data  
484 aggregations, if we obtain data from CDC WONDER at coarser population strata. For this purpose, we  
485 extracted annual death counts by sex, and age bands (15-19 years, . . . , 95-99 years, >100 years) from the  
486 CDC WONDER mortality portal [CDC](#) [2023](#) from 2000 to 2021. The overall mortality counts that we  
487 aggregated from the NCHS line list data were identical with the CDC WONDER mortality data without  
488 cause-of-death stratification. Secondly, we extracted annual death counts by sex, age bands (15-19 years,  
489 . . . , 95-99 years, >100 years) and cause-of-death (ICD-10 113 Selected Causes of Death) from the CDC  
490 WONDER mortality portal [CDC](#) [2023](#) from 2000 to 2021, without stratification by race & ethnicity. We  
491 then compared the mortality counts from the two data sources for each year and the leading caregiver loss  
492 causes-of-death (Supplementary Fig. [S19](#)). We found that across years, the maximum discrepancy in the  
493 CDC WONDER counts relative to the NCHS mortality counts was 0.0068% in women and 0.0057% in men,  
494 which reflected data suppression especially due to homicide excluding drug overdose in women, and overall  
495 indicated consistency of our data with that from CDC WONDER.

496 **Sensitivity in live births data.** In the central analysis, we derived live birth counts by year, sex, age  
497 band, and standardized race & ethnicity from NCHS line-list natality records from 1969 to 2021. Aggregate  
498 live birth counts are also available from CDC WONDER [CDC WONDER](#) [2022](#) from 1995 to 2021. We chose  
499 to extract data from the NCHS Vital Statistics portal because this allowed us to use the same data source  
500 across all years. The CDC WONDER live birth counts allowed us to check our in-house data aggregations.  
501 For this purpose, we extracted annual live birth counts from the CDC WONDER natality portal for women  
502 by age bands 15-19 years, . . . , 45-49 years from 2000 to 2021, and separately for men by age bands 15-19 years,  
503 . . . , 55+ years from 2016 to 2021 without stratification by race & ethnicity, which avoids data suppression.  
504 We then compared the live birth counts from the two data sources for each year and found that both data  
505 sets matched across all years.

506 **Sensitivity in national-level orphanhood estimates to assumptions on historic fertility rates.** In  
507 the central analysis, we assumed that male and female fertility rates by age and standardized race & ethnicity  
508 were in 1966-1989 constant and as in 1990 (Supplementary Fig. [S7](#)). This assumption was made because  
509 population size data stratified by detailed race categories (more than three categories) were not publicly  
510 available before 1990. Considering that age- and sex-specific live births data were available by race & ethnicity  
511 since 1978, we estimated in this sensitivity analysis the historic composition of population sizes by race &  
512 ethnicity in 1980-1989, and then updated the corresponding fertility rates and national-level orphanhood  
513 incidence and prevalence estimates. More specifically, we considered time trends in the proportion of each  
514 race & ethnicity in each 5-year age band and both sexes in the U.S. intercensal population size estimates  
515 in 1990 to 1995 (Supplementary Fig. [S20A](#)), and extrapolated these with linear models backwards in time  
516 to 1980-1989. We do not think that this estimation approach resulted in accurate estimates of population  
517 sizes, but rather that this approach conveys possible sensitivities in our orphanhood estimates. We identified

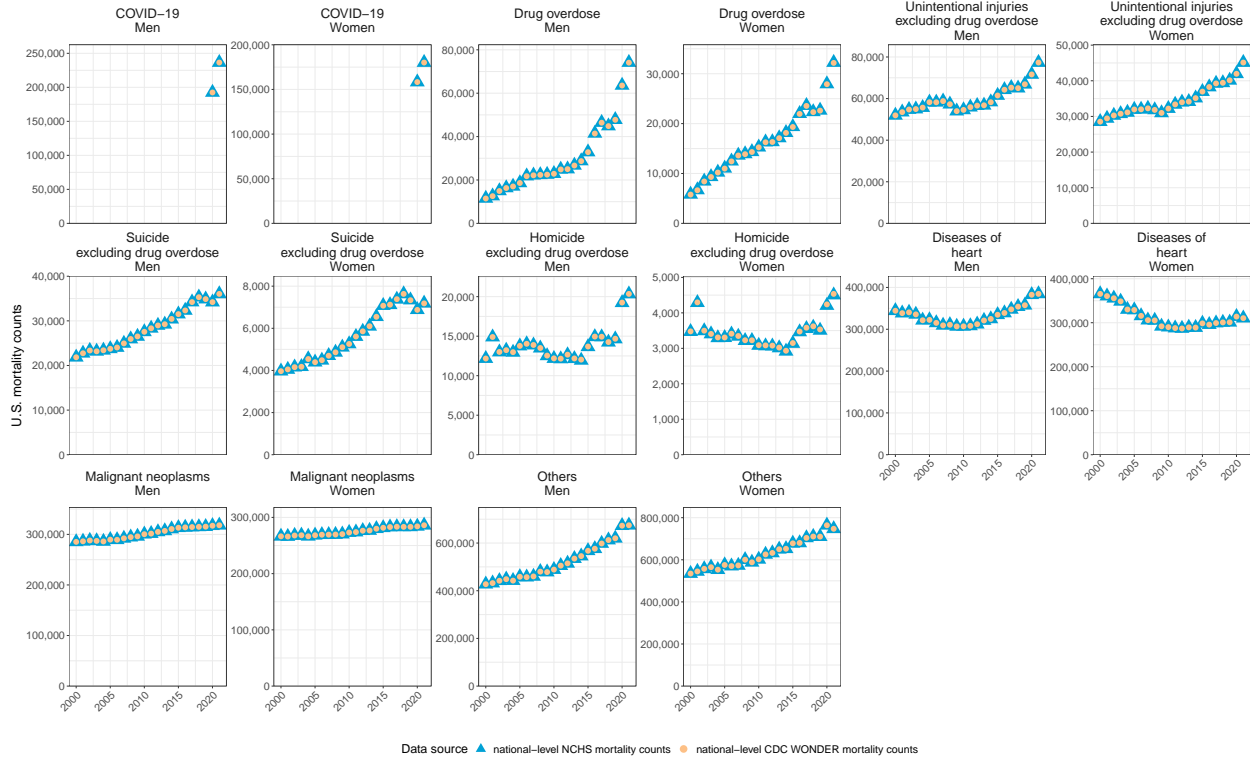

Supplementary Fig. S19: Comparison of national-level U.S. mortality counts from NCHS and CDC WONDER. In the central analysis, we derived mortality counts by year, sex, age band, standardized race & ethnicity and caregiver loss causes-of-death from NCHS line-list mortality records from 1983 to 2021. To check consistency of our data aggregations, we extracted annual death counts by sex, age bands (15-19 years, . . . , 95-99 years, >100 years) and cause-of-death (ICD-10 113 Selected Causes of Death) from CDC WONDER (i.e. without further stratification by standardized race & ethnicity). Mortality counts from both data sources were identical except for deaths due to homicide excluding drug overdose in women, and overall indicated consistency of our data with that from CDC WONDER.

518 minor sensitivities to national orphanhood prevalence estimates up to 2007, with no impact on incidence  
 519 and prevalence estimates for recent years (Supplementary Fig. [S20](#)).

520 **Sensitivity in national-level orphanhood estimates to potentially correlated fertility rates.** In  
 521 the central analysis, we assumed that population-level fertility rates were not correlated with population-level  
 522 mortality rates. We considered in sensitivity analyses possible deviations from this assumption that might  
 523 lead to upwards bias in our central estimates. For example, a person who died in year  $y$  may have experienced  
 524 poor health in the preceding years  $y - 1$ ,  $y - 2$ , . . . and in this case may also have been less likely to mother or  
 525 father a child in years  $y$ ,  $y - 1$ ,  $y - 2$ , . . . We modelled this possibility through four scenarios of dampened  
 526 fertility rates close to individual death events. Specifically, we considered cumulative logistic adjustment  
 527 factors that dampened fertility rates to either zero or half of the corresponding population-level, year-, age-,  
 528 sex-, and standardized race & ethnicity-specific fertility rates in the year of death  $y$ . We also considered  
 529 sensitivity analyses so that the onset of lower fertility rates preceded the year of death  $y$  by 1 or 3 years as  
 530 shown in Supplementary Fig. [S21](#)A. We found that orphanhood incidence estimates were up to 8.4% lower  
 531 than in the central analysis, and orphanhood prevalence estimates were up to 15% lower than in the central

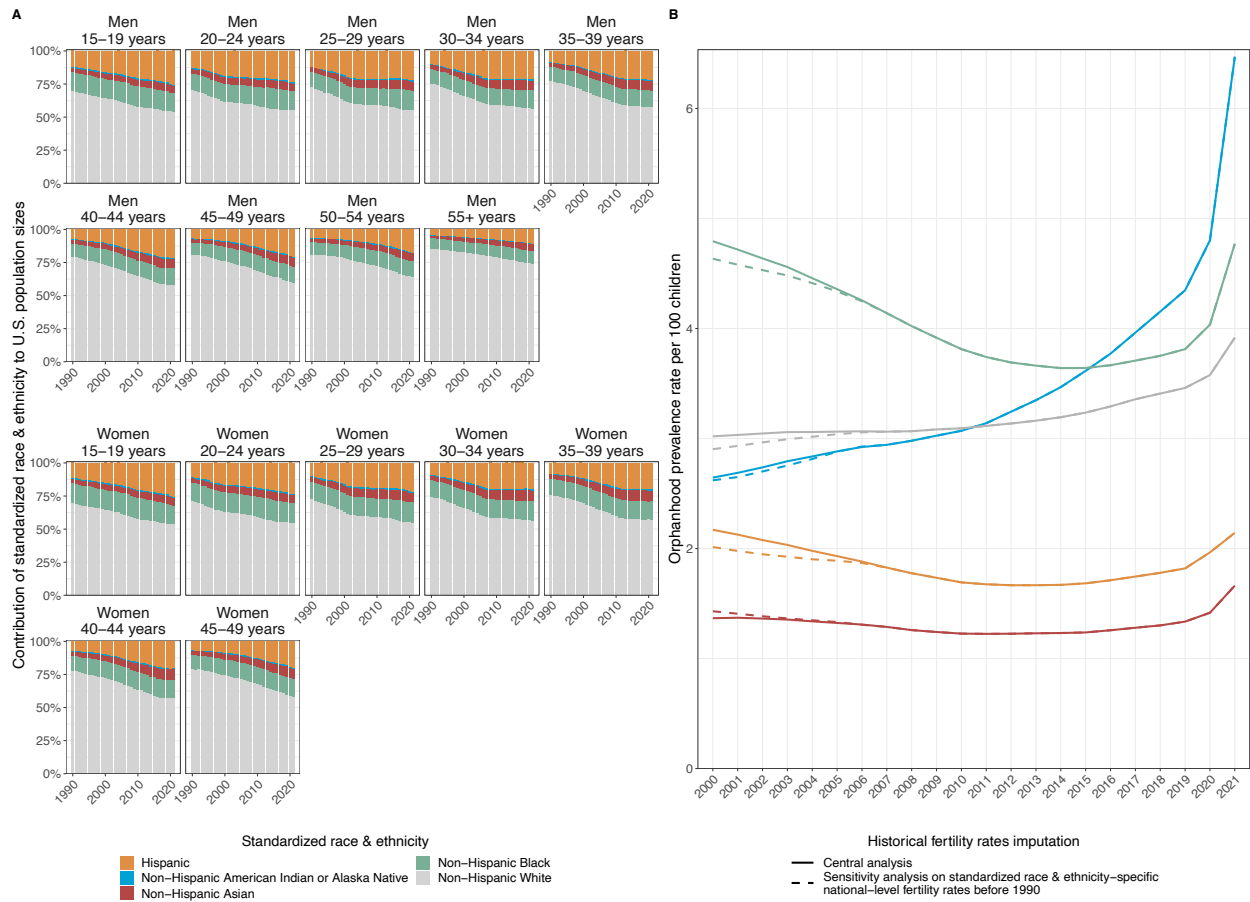

Supplementary Fig. S20: Sensitivity in national-level orphanhood estimates to assumptions on historic fertility rates. (A) Composition of U.S. population by standardized race & ethnicity (fill colours) from 1990 to 2021, for both men and women in the age bands relevant for orphanhood estimation. (B) Estimated national-level orphanhood prevalence rates by standardized race & ethnicity (colours) in the sensitivity analysis (dashed) and central analysis (solid line). We identified minor sensitivities to national orphanhood prevalence estimates up to 2007, with no impact on incidence and prevalence estimates for recent years.

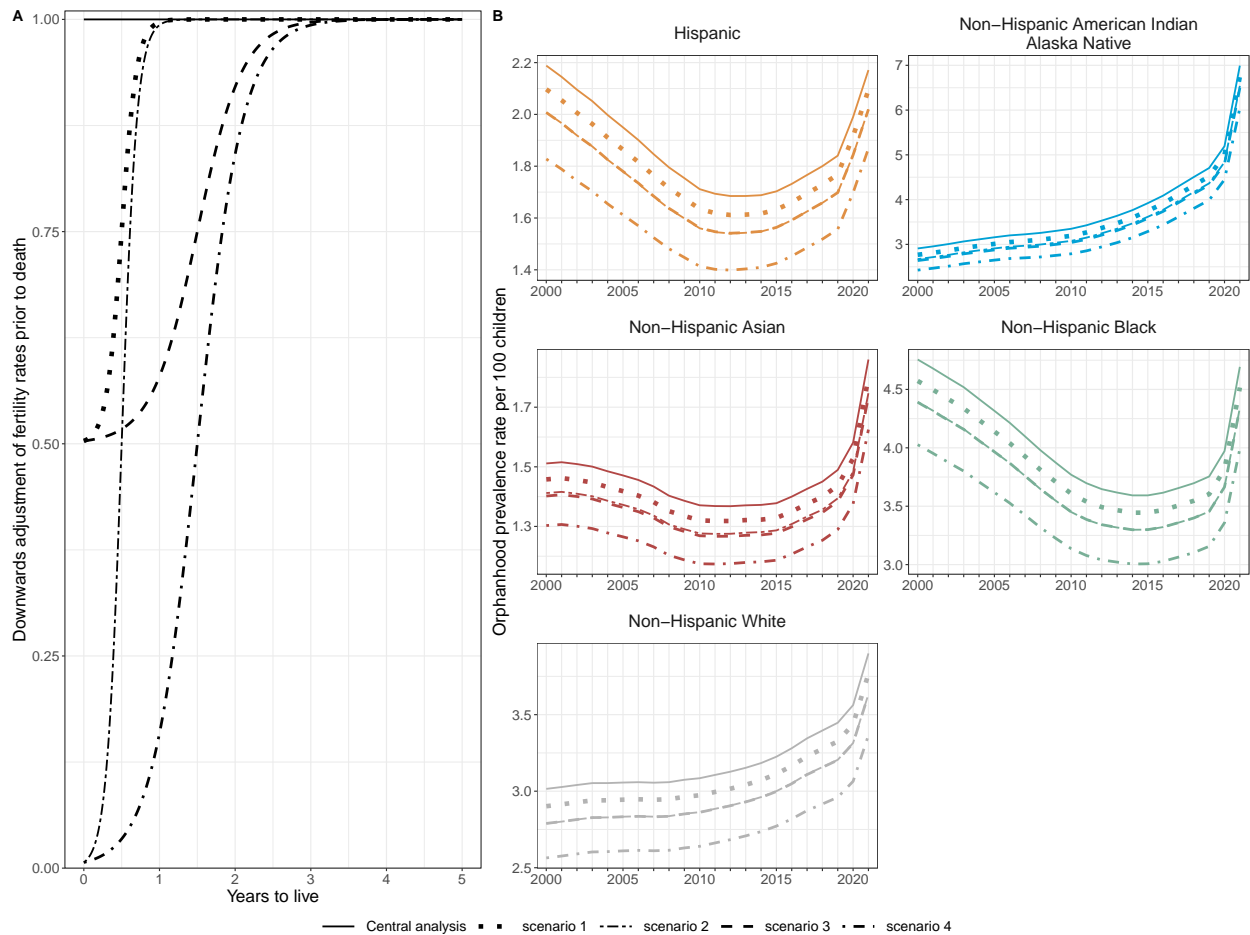

Supplementary Fig. S21: Sensitivity in national-level orphanhood estimates to assumptions on correlations between fertility and mortality rates. (A) We considered four scenarios of lower fertility rates preceding a death event, which we implemented through time-dependent multiplication factors to fertility rates by the time prior to a death event. (B) Estimated national-level orphanhood prevalence rates by race and ethnicity (facets and colours) in the sensitivity analyses (dashed, dotted, dotdash and twodash lines) and central analysis (solid line).

532 analysis (Supplementary Fig. S21B). It is also possible that our central orphanhood estimates might be biased  
 533 downward. For example, women experiencing premature death are more likely economically disadvantaged  
 534 and in turn are more likely to have had reduced access to contraceptives and corresponding higher fertility  
 535 rates (Price et al., 2013), or earlier sexual debut resulting in higher cumulative fertility until death. It is also  
 536 possible that overall, at population-level, there is no strong correlation between fertility and mortality rates  
 537 especially as the lag between birth and death events is typically relatively large, and in the absence of data  
 538 we have opted for this middle approach in the central analysis.

539 **Sensitivity in national-level grandparent caregiver loss estimates to assumptions on the age**  
 540 **of children experiencing loss of a grandparent caregiver.** In the central analysis, we considered  
 541 in Eq. (13) as a proxy to the age composition of children experiencing grandparent caregiver loss the age  
 542 composition of children experiencing orphanhood. Calculations were done independently for each leading  
 543 caregiver loss cause-of-death. We performed two analyses to characterise the sensitivity of this approach to

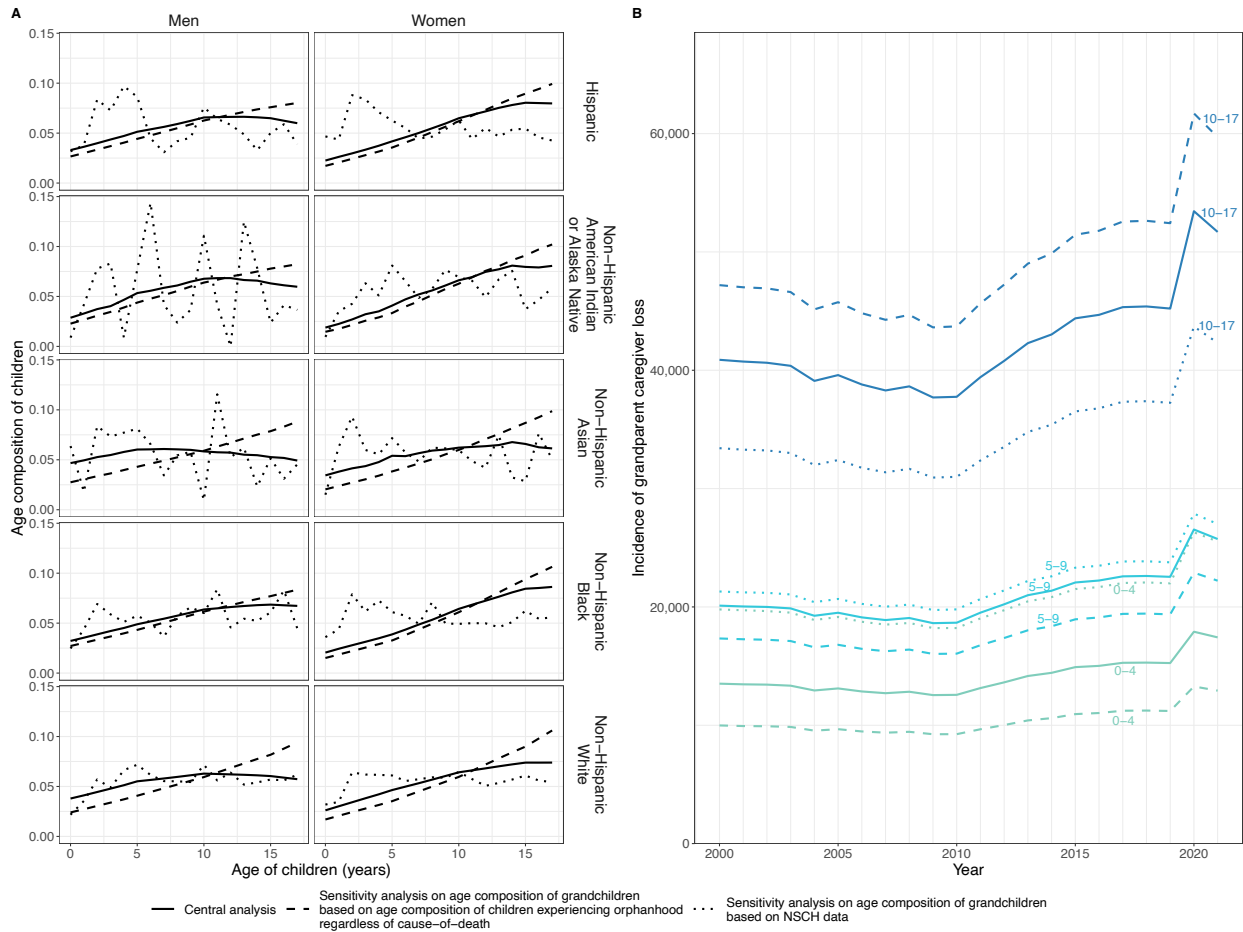

Supplementary Fig. S22: Sensitivity in national-level grandparent caregiver loss estimates to assumptions on the age of children experiencing loss of a grandparent caregiver. (A) Proxies for the age distribution of children who lost grandparent caregivers in two sensitivity analyses. In the first sensitivity analysis (dashed line), we computed the age distribution of children experiencing the death of a parent aged 30+ years across all causes-of-death and by race & ethnicity of the decedent parent. In the second sensitivity analysis (dotted line), we computed the age distribution of randomly selected children living with a grandparent caregiver by race & ethnicity of the child from NSCH surveys in 2016-2021. For comparison, we show the age distribution of children experiencing the death of a parent aged 30+ years due to drug overdose (solid line). (B) Estimated national-level grandparent caregivers loss incidence by age of child (colours) in the two sensitivity analyses (dashed, dotted line) and central analysis (solid line). Labels in colour represent the age of child.



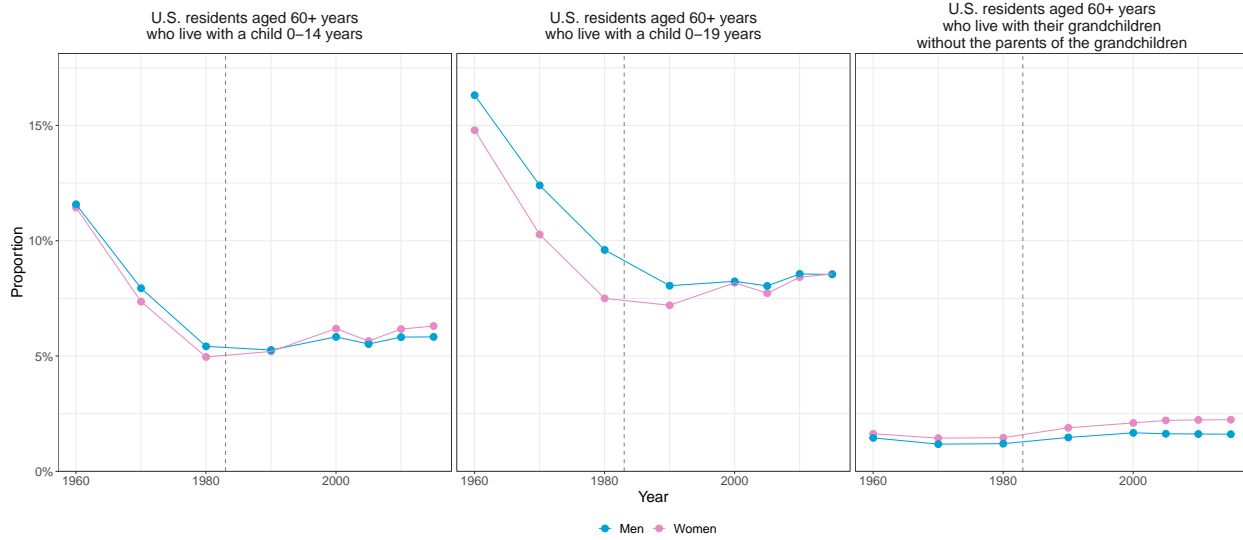

Supplementary Fig. S23: Time trends in the proportion of U.S. residents older than 60 years who are living or caring for children. Data were obtained from United Nations Population Division, data on Households and Living Arrangements of Older Persons between 1960 and 2015. The dashed line represents the year since when grandparent caregiver loss estimates were generated, 1983.

544 national-level grandparent caregiver loss estimates. First, we repeated calculations using as proxy the age  
 545 composition of children experiencing orphanhood across all causes of caregiver loss, i.e.

$$G_{y,s,r,b,c}^{\text{new}} = G_{y,s,r,c}^{\text{new}} \times \frac{\sum_{c,a' \geq 30} O_{a',s,r,b,c}^{\text{new}}}{\sum_{c,b=0}^{17} \sum_{a' \geq 30} O_{a',s,r,b,c}^{\text{new}}} \quad (19)$$

546 Second, we used data from the ‘Topical survey’ of the National Survey of Children’s Health (NSCH) [US  
 547 Census Bureau, 2023a], filtered to respondents reporting to be grandparents and living with at least one  
 548 child in the household. Respondents were asked to report on demographic characteristics including the age  
 549 and race & ethnicity of one randomly selected child. We pooled these data across six years from 2016 to  
 550 2021 to characterise the age composition of children who live with grandparents due to small sample sizes in  
 551 each survey after filtering (approximately 2,500 grandparents per survey round). Supplementary Fig. S22A  
 552 compares the age compositions used in the central analysis to those in the two sensitivity analyses. The  
 553 comparison of the grandparent caregivers prevalence estimates are shown between the central estimate and  
 554 two sensitivity analyses by age of child in Supplementary Fig. S22B. We found that grandparent caregiver  
 555 incidence estimates deviated by up to  $\pm 0.028\%$  and  $\pm 0.032\%$  of the central estimate in the two sensitivity  
 556 analyses due to the rounding numbers, respectively. Additionally, in the two sensitivity analyses, grandparent  
 557 caregiver prevalence estimates were respectively 12.0% fewer and 13.6% higher than in the central analysis.

558 **Sensitivity in national-level caregiver loss estimates to assumptions on historic numbers of**  
 559 **grandparent caregivers.** In the central analysis, we assumed that the proportion of adults aged 30+  
 560 years who live with their grandchildren of age 17 or under (denoted  $\gamma_{y,s,r}$ ) was the same in the years  
 561  $y = 1983, \dots, 2009$  as in 2010. This assumption was made because data were not available prior to 2010.  
 562 To investigate the implications of this assumption, we considered longitudinal United Nations Population  
 563 Division data on Households and Living Arrangements of Older Persons for the U.S. since 1960 [United

---

564 [Nationa Population Division](#) [2022](#). These data indicate that the proportion of older persons who live with  
565 children or who are the primary caregivers of children has in the U.S. remained fairly constant since 1980  
566 (Supplementary Fig. [S23](#)), and for this reason suggests that our assumptions on the historic number of  
567 grandparent caregivers is unlikely to have a substantive impact on caregiver loss estimates.

## 568 References

569 R. N. Anderson, A. M. Miniño, D. L. Hoyert, and H. M. Rosenberg. Comparability of cause of death  
570 between ICD-9 and ICD-10: Preliminary estimates. *Natl Vital Stat Rep.*, 49(2):1-32, 2001. URL [https://www.cdc.gov/nchs/data/nvsr/nvsr49/nvsr49\\_02.pdf](https://www.cdc.gov/nchs/data/nvsr/nvsr49/nvsr49_02.pdf).

572 E. Arias, J. Xu, B. Tejada-Vera, S. L. Murphy, B. Bastian, and D. of Vital Statistics. United States life  
573 tables, 2020. *Natl Vital Stat Rep.*, 72(2), Aug. 2022.

574 CDC. Bridged-race population estimates United States, 1990 - 2020, 2021a. URL <https://wonder.cdc.gov/wonder/help/bridged-race.html#About%201990-2020>.

576 CDC. Single-race population estimates United States, 1990 - 2020, 2021b. URL <https://wonder.cdc.gov/wonder/help/single-race.html#About%202020-2021>.

578 CDC. Bridged-race population estimates 1990-2020 request, 2021c. URL <https://wonder.cdc.gov/Bridged-Race-v2020.HTML>.

580 CDC. Single-race population estimates, 2022. URL <https://wonder.cdc.gov/single-race-population.html>.

582 CDC. Deaths by underlying cause, 2023. URL <https://wonder.cdc.gov/Deaths-by-Underlying-Cause.html>.

584 CDC WONDER. Natality information, 2022. URL <https://wonder.cdc.gov/natality.html>.

585 B. B. Curtin SC, Tejada-Vera B. Deaths: Leading causes for 2020. *Hyattsville, MD: National Center for*  
586 *Health Statistics*, (13), 2023. Available from: <https://www.cdc.gov/nchs/data/nvsr/nvsr72/nvsr72-13.pdf>.

587 R. R. Ellis and T. Simmons. Coresident grandparents and their grandchildren: 2012. *Census.gov*, 2014. URL  
588 <https://www.census.gov/library/publications/2014/demo/p20-576.html>. Section: Government.

589 M. Heron. Comparability of race-specific mortality data based on 1977 versus 1997 reporting standards.  
590 *Natl Vital Stat Rep.*, 70(3), Apr. 2021.

591 S. D. Hillis, A. Blenkinsop, A. Villaveces, F. B. Annor, L. Liburd, G. M. Massetti, Z. Demissie, J. A. Mercy,  
592 C. A. Nelson III, L. Cluver, et al. Covid-19-associated orphanhood and caregiver death in the united  
593 states. *Pediatrics*, 148(6):e2021053760, 2021a.

594 S. D. Hillis, H. J. T. Unwin, Y. Chen, L. Cluver, L. Sherr, P. S. Goldman, O. Ratmann, C. A. Donnelly,  
595 S. Bhatt, A. Villaveces, et al. Global minimum estimates of children affected by COVID-19-associated  
596 orphanhood and deaths of caregivers: a modelling study. *The Lancet*, 398(10298):391-402, 2021b.

597 D. D. Ingram, J. D. Parker, N. Schenker, J. A. Weed, B. Hamilton, E. Arias, and J. H. Madans. United  
598 States census 2000 population with bridged race categories. *Vital Health Stat 2*, (135), 2003.

599 E. T. Lee and J. Wang. *Statistical methods for survival data analysis*, volume 476. John Wiley & Sons, 2003.

600 T. Mathews and B. E. Hamilton. Total fertility rates by state and race and hispanic origin: United states,  
601 2017. 2019.

602 National Cancer Institute. SEER single year of age county population estimates - SEER population data,  
603 2023. URL <https://seer.cancer.gov/popdata/singleages.html>.

604 National Center for Health Statistics. 1978 detail natality standard micro-data tape tmnscript tape contents  
605 documentation, 1978. URL <https://data.nber.org/natality/1978/nat11978.pdf>.

606 National Center for Health Statistics. Instruction manual part 9: Icd-9 cause of death lists for tabulating  
607 mortality statistics, effective 1979. *Hyattsville, Maryland: National Center for Health Statistics*, 1979.

608 National Center for Health Statistics. Public use data tape documentation Multiple Cause of Death for  
609 ICD-9 1986 Data, 1988. URL <https://data.nber.org/mortality/1986/dt86icd9.pdf>.

610 National Center for Health Statistics. User guide to the 2006 natality public use file, 2006.

611 National Center for Health Statistics. Instruction manual part 9: ICD-10 cause of death lists for tabulating  
612 mortality statistics (updated October 2020 to include WHO updates to ICD-10 for data year 2020).  
613 *Hyattsville, Maryland: National Center for Health Statistics*, 2020.

614 National Center for Health Statistics. NVSS - public use data file documentation, 2022. URL [https://www.cdc.gov/nchs/nvss/mortality\\_public\\_use\\_data.htm](https://www.cdc.gov/nchs/nvss/mortality_public_use_data.htm). Accessed Aug 3, 2023.

615

616 National Center for Health Statistics. Data access - vital statistics online, 2023. URL [https://www.cdc.gov/nchs/data\\_access/vitalstatsonline.htm](https://www.cdc.gov/nchs/data_access/vitalstatsonline.htm). Accessed Aug 3, 2023.

617

618 National Center for Injury Prevention and Control (U.S.). Division of Unintentional Injury Prevention. Health  
619 Systems and Trauma Systems Branch. Prescription Drug Overdose Team. Prescription drug overdose  
620 data & statistics: guide to ICD-9-CM and ICD-10 codes related to poisoning and pain, 2013. URL  
621 <https://stacks.cdc.gov/view/cdc/59394>.

622 Pew Research Center. Grandparents living with or serving as primary caregivers for their grandchildren,  
623 Sept. 2013. URL <https://www.pewresearch.org/social-trends/2013/09/04/grandparents-living-with-or-serving-as-primary-caregivers-for-their-grandchildren/>.

624

625 J. H. Price, J. Khubchandani, M. McKinney, R. Braun, et al. Racial/ethnic disparities in chronic diseases  
626 of youths and access to health care in the united states. *BioMed Research International*, 2013, 2013.

627 H. M. Rosenberg. *Quality of death rates by race and Hispanic-origin: a summary of current research, 1999*,  
628 volume 128. National Center for Health Statistics, 1999.

629 H. S. Shryock, J. S. Siegel, and E. A. Larmon. *The methods and materials of demography*, volume 2. US  
630 Bureau of the Census, 1975.

631 R. Sowden, E. Borgstrom, and L. E. Selman. It's like being in a war with an invisible enemy: A document  
632 analysis of bereavement due to COVID-19 in UK newspapers. *PLoS one*, 16(3):e0247904, 2021.

633 UNAIDS. National AIDS spending assessment (NASA): Classification taxonomy and definitions, 2009. URL  
634 [https://www.unaids.org/en/resources/documents/2009/20090630\\_20090916\\_nasa\\_classificati](https://www.unaids.org/en/resources/documents/2009/20090630_20090916_nasa_classificati)  
635 [ons\\_edition\\_en.pdf](https://www.unaids.org/en/resources/documents/2009/20090630_20090916_nasa_classificati).

636 United Nations Population Division. Living arrangements of older persons | population division, 2022. URL  
637 <https://www.un.org/development/desa/pd/data/living-arrangements-older-persons>.

638 United Nations Population Division. World Population Prospects - Population Division - United Nations,  
639 2020. URL <https://population.un.org/wpp/Download/Standard/Mortality/>.

640 United States Census bureau. Table S1002, 2015-2019 American Community Survey 5-Year Estimates, 2021.  
641 URL <https://data.census.gov/cedsci/table?tid=ACSST5Y2019.S1002>.

642 H. J. T. Unwin, S. Hillis, L. Cluver, S. Flaxman, P. S. Goldman, A. Butchart, G. Bachman, L. Rawlings, C. A.  
643 Donnelly, O. Ratmann, P. Green, C. A. Nelson, A. Blenkinsop, S. Bhatt, C. Desmond, A. Villaveces, and  
644 L. Sherr. Global, regional, and national minimum estimates of children affected by COVID-19-associated  
645 orphanhood and caregiver death, by age and family circumstance up to Oct 31, 2021: an updated modelling  
646 study. *The Lancet Child & Adolescent Health*, 6(4):249–259, Apr. 2022. ISSN 2352-4642. doi: 10.1016/S2  
647 352-4642(22)00005-0. URL <https://www.sciencedirect.com/science/article/pii/S2352464222000050>  
648 [050](https://www.sciencedirect.com/science/article/pii/S2352464222000050).

649 US Census Bureau. NSCH Datasets, mar 2023a. URL <https://www.census.gov/programs-surveys/nsc>  
650 [h/data/datasets.html](https://www.census.gov/programs-surveys/nsc).

651 US Census Bureau. Presence of parents for children living in the home of a grandparent. 2014, 2023b. URL  
652 [https://www.census.gov/content/dam/Census/library/visualizations/time-series/demo/famil](https://www.census.gov/content/dam/Census/library/visualizations/time-series/demo/families-and-households/ch-7.pdf)  
653 [ies-and-households/ch-7.pdf](https://www.census.gov/content/dam/Census/library/visualizations/time-series/demo/families-and-households/ch-7.pdf).

654 World Health Organization. Manual of the international statistical classification of diseases, injuries, and  
655 causes of death, ninth revision. *Geneva: World Health Organization*, 1977.

656 World Health Organization. International statistical classification of diseases and related health problems,  
657 tenth revision: Volume ii, instruction manual, fifth edition. *Geneva: World Health Organization*, 2016.  
658 Available from: [https://icd.who.int/browse10/Content/statichtml/ICD10Volume2\\_en\\_2019.pdf](https://icd.who.int/browse10/Content/statichtml/ICD10Volume2_en_2019.pdf).
